# Supplementary material for: Rhodium(iii)-catalyzed regio- and stereoselective benzylic α-fluoroalkenylation with gem-difluorostyrenes
Source: Royal Society of Chemistry journal article supplement (doi:10.1039/c7cc06048c), 2017-01-01

## *Electronic Supplementary Information*

### **Rhodium(III)-Catalyzed Regio- and Stereoselective Benzylic**

### **$\alpha$ -Fluoroalkenylation with *gem*-Difluorostyrenes**

Lingheng Kong,<sup>a,b</sup> Bingxian Liu,<sup>c</sup> Xukai Zhou,<sup>a,b</sup> Fen Wang,<sup>\*,a</sup> Xingwei Li<sup>\*,a</sup>

<sup>a</sup> *Dalian Institute of Chemical Physics, Chinese Academy of Sciences, Dalian 116023, China*

<sup>b</sup> *University of Chinese Academy of Sciences, Beijing 100049, China*

<sup>c</sup> *School of Chemistry and Chemical Engineering, Henan Normal University, Xinxiang 453007, China*

Email: [xwli@dicp.ac.cn](mailto:xwli@dicp.ac.cn), [wangfen@dicp.ac.cn](mailto:wangfen@dicp.ac.cn)

## Table of Contents

|             |                                                                   |     |
|-------------|-------------------------------------------------------------------|-----|
| <b>I.</b>   | General Remarks .....                                             | S2  |
| <b>II.</b>  | General procedures for the synthesis of compound <b>3</b> .....   | S2  |
| <b>III.</b> | Derivatization of coupled product <b>3aa</b> and <b>3oa</b> ..... | S18 |
| <b>IV.</b>  | Mechanistic Studies .....                                         | S19 |
|             | (a) H/D Exchange Experiments .....                                | S19 |
|             | (b) Competition Reaction.....                                     | S23 |
|             | (c) KIE Study .....                                               | S25 |
|             | (d) Synthetic method of 2 mmol scale .....                        | S26 |
| <b>V.</b>   | References .....                                                  | S26 |
| <b>VI.</b>  | NMR Spectra of Coupled Products.....                              | S27 |

## I. General Remarks

All chemicals were obtained from commercial sources and were used as received unless otherwise noted. All reactions were carried out using Schlenk techniques or in an N<sub>2</sub>-filled glovebox. NMR Spectra were recorded on a 400 MHz NMR spectrometer in the solvent indicated. The chemical shift is given in dimensionless  $\delta$  values and is frequency referenced relative to TMS in <sup>1</sup>H and <sup>13</sup>C NMR spectroscopy. HRMS data were obtained on a Thermo Scientific LTQ Orbitrap Discovery spectrometer (Bremen, Germany). Column chromatography was performed on silica gel (300-400 mesh) using ethyl acetate/hexanes. 8-Methylquinolines<sup>1</sup> and *gem*-difluoroalkenes<sup>2</sup> were prepared according to literature reports.

## II. General procedures for the synthesis of compound 3

**Typical Reaction Conditions.** 8-Methylquinoline (0.2 mmol), *gem*-difluoroalkene (0.3 mmol), [Cp\*RhCl<sub>2</sub>]<sub>2</sub> (5 mol%), AgNTf<sub>2</sub> (20 mol%), Ca(OH)<sub>2</sub> (3.0 equiv), Zn(OAc)<sub>2</sub> (50 mol%), 4 Å M.S. (100 mg), and TFE (2 mL) were charged into a pressure tube. The reaction mixture was stirred under N<sub>2</sub> at 45 °C for 24 h. After the solvent was removed under reduced pressure, the residue was purified by silica gel chromatography using PE/EA (40:1 to 20:1) to afford the product **3**.

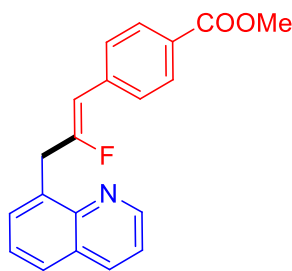

(*Z*)-Methyl 4-(2-fluoro-3-(quinolin-8-yl)prop-1-en-1-yl)benzoate (**3aa**)

**3aa** was obtained according to the general procedure in 81% yield (51.7 mg), white solid, *R*<sub>f</sub> = 0.30 (hexanes/ethyl acetate = 25/1). <sup>1</sup>H NMR (400 MHz, CDCl<sub>3</sub>)  $\delta$  8.95 (dd, *J* = 4.2, 1.7 Hz, 1H), 8.16 (dd, *J* = 8.3, 1.7 Hz, 1H), 7.95 – 7.93 (m, 2H), 7.76 (d, *J* = 8.2 Hz, 1H), 7.73 (d, *J* = 7.0 Hz, 1H), 7.58 – 7.47 (m, 3H), 7.42 (dd, *J* = 8.3, 4.2 Hz, 1H), 5.63 (d, *J* = 38.6 Hz, 1H), 4.41 (d, *J* = 17.0 Hz, 2H), 3.88 (s, 3H). <sup>13</sup>C NMR (100 MHz, CDCl<sub>3</sub>)  $\delta$  167.0, 161.8 (d, *J*<sub>C-F</sub> = 269.7 Hz), 149.9, 146.7, 138.6 (d, *J*<sub>C-F</sub> = 2.8 Hz), 136.5, 134.7, 129.8, 129.8, 128.6, 128.3 (d, *J*<sub>C-F</sub> = 7.8 Hz), 128.1 (d, *J*<sub>C-F</sub> = 2.4 Hz), 127.5, 126.4, 121.4, 107.1 (d, *J*<sub>C-F</sub> = 7.7 Hz), 52.12, 34.6 (d, *J*<sub>C-F</sub> = 27.6 Hz). <sup>19</sup>F NMR (376 MHz, CDCl<sub>3</sub>)  $\delta$  -94.6. HRMS: *m/z*: [M + H]<sup>+</sup> calculated for C<sub>20</sub>H<sub>16</sub>FNO<sub>2</sub>: 322.1238, found 322.1237.

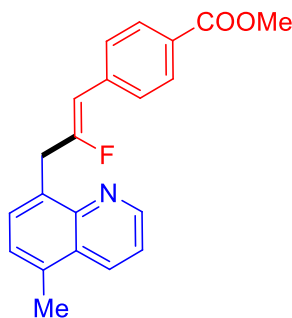

(Z)-Methyl 4-(2-fluoro-3-(5-methylquinolin-8-yl)prop-1-en-1-yl)benzoate (**3ba**)

**3ba** was obtained according to the general procedure in 72% yield (48.0 mg), white solid,  $R_f = 0.30$  (hexanes/ethyl acetate = 25/1).  $^1\text{H}$  NMR (400 MHz,  $\text{CDCl}_3$ )  $\delta$  8.94 (dd,  $J = 4.1, 1.7$  Hz, 1H), 8.32 (dd,  $J = 8.5, 1.7$  Hz, 1H), 7.94 – 7.92 (m, 2H), 7.60 (d,  $J = 7.2$  Hz, 1H), 7.50 – 7.48 (m, 2H), 7.43 (dd,  $J = 8.5, 4.1$  Hz, 1H), 7.34 (d,  $J = 7.2$  Hz, 1H), 5.59 (d,  $J = 38.6$  Hz, 1H), 4.37 (d,  $J = 16.6$  Hz, 2H), 3.88 (s, 3H), 2.67 (s, 3H).  $^{13}\text{C}$  NMR (100 MHz,  $\text{CDCl}_3$ )  $\delta$  167.0, 162.1 (d,  $J_{\text{C-F}} = 269.8$  Hz), 149.3, 146.8, 138.7 (d,  $J_{\text{C-F}} = 2.8$  Hz), 134.2, 132.8, 132.6 (d,  $J_{\text{C-F}} = 1.9$  Hz), 129.7, 129.5, 128.3 (d,  $J_{\text{C-F}} = 7.8$  Hz), 128.0 (d,  $J_{\text{C-F}} = 2.4$  Hz), 127.9, 126.9, 120.9, 106.9 (d,  $J_{\text{C-F}} = 7.7$  Hz), 52.1, 34.6 (d,  $J_{\text{C-F}} = 27.6$  Hz), 18.7.  $^{19}\text{F}$  NMR (376 MHz,  $\text{CDCl}_3$ )  $\delta$  -94.5. HRMS:  $m/z$ :  $[\text{M} + \text{H}]^+$  calculated for  $\text{C}_{21}\text{H}_{18}\text{FNO}_2$ : 336.1394, found 336.1398.

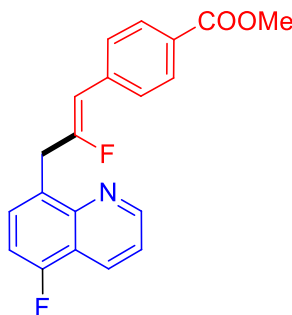

(Z)-Methyl 4-(2-fluoro-3-(5-fluoroquinolin-8-yl)prop-1-en-1-yl)benzoate (**3ca**)

**3ca** was obtained according to the general procedure in 68% yield (46.1 mg), white solid,  $R_f = 0.35$  (hexanes/ethyl acetate = 25/1).  $^1\text{H}$  NMR (400 MHz,  $\text{CDCl}_3$ )  $\delta$  8.98 (dd,  $J = 4.2, 1.8$  Hz, 1H), 8.43 (dd,  $J = 8.4, 1.8$  Hz, 1H), 7.99 – 7.90 (m, 2H), 7.66 – 7.63 (m, 1H), 7.54 – 7.45 (m, 3H), 7.20 (dd,  $J = 9.5, 8.1$  Hz, 1H), 5.62 (d,  $J = 38.5$  Hz, 1H), 4.34 (d,  $J = 16.9$  Hz, 2H), 3.88 (s, 3H).  $^{13}\text{C}$  NMR (100 MHz,  $\text{CDCl}_3$ )  $\delta$  167.0, 161.5 (dd,  $J_{\text{C-F}} = 269.4, 0.9$  Hz), 157.2 (d,  $J_{\text{C-F}} = 253.3$  Hz), 150.7, 147.0 (d,  $J_{\text{C-F}} = 2.8$  Hz), 138.5 (d,  $J_{\text{C-F}} = 2.8$  Hz), 130.6 (dd,  $J_{\text{C-F}} = 4.6, 1.5$  Hz), 129.8, 129.6 (d,  $J_{\text{C-F}} = 4.8$  Hz), 129.2 (d,  $J_{\text{C-F}} = 8.6$  Hz), 128.3 (d,  $J_{\text{C-F}} = 7.8$  Hz), 128.2 (d,  $J_{\text{C-F}} = 2.4$  Hz), 121.4 (d,  $J_{\text{C-F}} = 2.9$  Hz), 119.4 (d,  $J_{\text{C-F}} = 16.2$  Hz), 109.9 (d,  $J_{\text{C-F}} = 19.1$  Hz), 107.1 (d,  $J_{\text{C-F}} = 7.7$  Hz), 52.1, 34.2 (d,  $J_{\text{C-F}} = 27.7$  Hz).  $^{19}\text{F}$  NMR (376 MHz,  $\text{CDCl}_3$ )  $\delta$  -95.2, -123.7. HRMS:  $m/z$ :  $[\text{M} + \text{H}]^+$  calculated for  $\text{C}_{20}\text{H}_{15}\text{F}_2\text{NO}_2$ : 340.1144, found 340.1143.

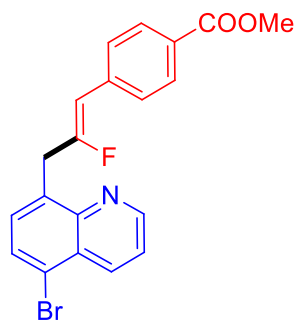

(Z)-Methyl 4-(3-(5-bromoquinolin-8-yl)-2-fluoroprop-1-en-1-yl)benzoate (**3da**)

**3da** was obtained according to the general procedure in 60% yield (48.2 mg), white solid,  $R_f = 0.30$  (hexanes/ethyl acetate = 15/1).  $^1\text{H}$  NMR (400 MHz,  $\text{CDCl}_3$ )  $\delta$  8.96 (dd,  $J = 4.1, 1.6$  Hz, 1H), 8.55 (dd,  $J = 8.5, 1.6$  Hz, 1H), 7.95 – 7.93 (m, 2H), 7.81 (d,  $J = 7.7$  Hz, 1H), 7.58 (d,  $J = 7.7$  Hz, 1H), 7.55 – 7.47 (m, 3H), 5.63 (d,  $J = 38.5$  Hz, 1H), 4.36 (d,  $J = 17.1$  Hz, 2H), 3.89 (s, 3H).  $^{13}\text{C}$  NMR (100 MHz,  $\text{CDCl}_3$ )  $\delta$  167.0, 161.1 (d,  $J_{\text{C-F}} = 269.5$  Hz), 150.5, 147.3, 138.4 (d,  $J_{\text{C-F}} = 2.7$  Hz), 135.9, 134.9 (d,  $J_{\text{C-F}} = 1.2$  Hz), 130.2, 130.0, 129.8, 128.4, 128.3, 127.9, 122.5, 121.2, 107.3 (d,  $J_{\text{C-F}} = 7.6$  Hz), 52.2, 34.5 (d,  $J_{\text{C-F}} = 27.6$  Hz).  $^{19}\text{F}$  NMR (376 MHz,  $\text{CDCl}_3$ )  $\delta$  -95.2. HRMS:  $m/z$ :  $[\text{M} + \text{H}]^+$  calculated for  $\text{C}_{20}\text{H}_{15}\text{BrFNO}_2$ : 400.0343, found 400.0343.

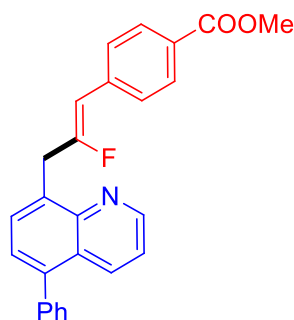

(Z)-Methyl 4-(2-fluoro-3-(5-phenylquinolin-8-yl)prop-1-en-1-yl)benzoate (**3ea**),  $Z/E = 15/1$

**3ea** was obtained according to the general procedure in 71% yield (56.7 mg), white solid,  $R_f = 0.3$  (hexanes/ethyl acetate = 15/1).  $^1\text{H}$  NMR (400 MHz,  $\text{CDCl}_3$ )  $\delta$  8.95 (d,  $J = 2.5$  Hz, 1H), 8.25 (dd,  $J = 8.5, 1.1$  Hz, 1H), 7.96 – 7.94 (m, 2H), 7.76 (d,  $J = 7.2$  Hz, 1H), 7.54 – 7.44 (m, 8H), 7.36 (dd,  $J = 8.5, 4.1$  Hz, 1H), 5.70 (d,  $J = 38.6$  Hz, 1H), 4.45 (d,  $J = 17.4$  Hz, 2H), 3.88 (s, 3H).  $^{13}\text{C}$  NMR (100 MHz,  $\text{CDCl}_3$ )  $\delta$  167.0, 161.7 (d,  $J_{\text{C-F}} = 269.7$  Hz), 149.6, 146.8, 140.1, 139.4, 138.6 (d,  $J_{\text{C-F}} = 2.7$  Hz), 134.8, 134.0 (d,  $J_{\text{C-F}} = 0.9$  Hz), 130.2, 129.8, 129.2, 128.6, 128.3 (d,  $J_{\text{C-F}} = 7.7$  Hz), 128.1 (d,  $J_{\text{C-F}} = 2.4$  Hz), 127.8, 127.04, 127.0, 121.2, 107.2 (d,  $J_{\text{C-F}} = 7.6$  Hz), 52.1, 34.8 (d,  $J_{\text{C-F}} = 27.4$  Hz).  $^{19}\text{F}$  NMR (376 MHz,  $\text{CDCl}_3$ )  $\delta$  -94.7. HRMS:  $m/z$ :  $[\text{M} + \text{H}]^+$  calculated for  $\text{C}_{26}\text{H}_{20}\text{FNO}_2$ : 398.1551, found 398.1555.

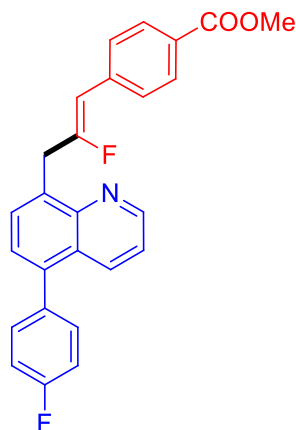

(Z)-Methyl 4-(2-fluoro-3-(5-(4-fluorophenyl)quinolin-8-yl)prop-1-en-1-yl)benzoate (**3fa**)

**3fa** was obtained according to the general procedure in 62% yield (51.3 mg), white solid,  $R_f = 0.3$  (hexanes/ethyl acetate = 15/1).  $^1\text{H}$  NMR (400 MHz,  $\text{CDCl}_3$ )  $\delta$  8.96 (dd,  $J = 4.1, 1.7$  Hz, 1H), 8.19 (dd,  $J = 8.6, 1.7$  Hz, 1H), 7.96 – 7.94 (m, 2H), 7.76 (d,  $J = 7.3$  Hz, 1H), 7.53 – 7.51 (m, 2H), 7.45 (d,  $J = 7.3$  Hz, 1H), 7.44 – 7.36 (m, 3H), 7.23 – 7.16 (m, 2H), 5.71 (d,  $J = 38.6$  Hz, 1H), 4.45 (d,  $J = 17.5$  Hz, 2H), 3.89 (s, 3H).  $^{13}\text{C}$  NMR (100 MHz,  $\text{CDCl}_3$ )  $\delta$  167.0, 162.6 (d,  $J_{\text{C-F}} = 245.6$  Hz), 161.7 (d,  $J_{\text{C-F}} = 269.7$  Hz), 149.7, 146.8, 138.9, 138.6 (d,  $J_{\text{C-F}} = 2.8$  Hz), 135.3 (d,  $J_{\text{C-F}} = 3.4$  Hz), 134.5, 134.3 (d,  $J_{\text{C-F}} = 0.9$  Hz), 131.7 (d,  $J_{\text{C-F}} = 8.0$  Hz), 129.8, 129.2, 128.3 (d,  $J_{\text{C-F}} = 7.8$  Hz), 128.2 (d,  $J_{\text{C-F}} = 2.3$  Hz), 127.2, 127.0, 121.4, 115.6 (d,  $J_{\text{C-F}} = 21.3$  Hz), 107.2 (d,  $J_{\text{C-F}} = 7.7$  Hz), 52.13, 34.8 (d,  $J_{\text{C-F}} = 27.5$  Hz).  $^{19}\text{F}$  NMR (376 MHz,  $\text{CDCl}_3$ )  $\delta$  -94.8, -114.5. HRMS:  $m/z$ :  $[\text{M} + \text{H}]^+$  calculated for  $\text{C}_{26}\text{H}_{19}\text{F}_2\text{NO}_2$ : 416.1457, found 416.1458.

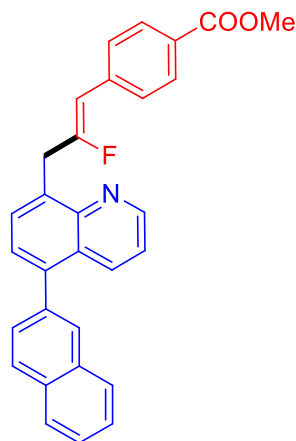

(Z)-Methyl 4-(2-fluoro-3-(5-(naphthalen-2-yl)quinolin-8-yl)prop-1-en-1-yl)benzoate (**3ga**)

**3ga** was obtained according to the general procedure in 63% yield (56.8 mg), white solid,  $R_f = 0.4$  (hexanes/ethyl acetate = 15/1).  $^1\text{H}$  NMR (400 MHz,  $\text{CDCl}_3$ )  $\delta$  8.97 (dd,  $J = 4.1, 1.7$  Hz, 1H), 8.28 (dd,  $J = 8.6, 1.7$  Hz, 1H), 7.98 – 7.86 (m, 6H), 7.80 (d,  $J = 7.3$  Hz, 1H), 7.58 – 7.52 (m, 6H), 7.36 (dd,  $J = 8.6, 4.1$  Hz, 1H), 5.71 (d,  $J = 38.6$  Hz, 1H), 4.48 (d,  $J = 17.2$  Hz, 2H), 3.88 (s, 3H).  $^{13}\text{C}$  NMR (100 MHz,  $\text{CDCl}_3$ )  $\delta$  167.1, 161.8 (d,  $J_{\text{C-F}} = 269.7$  Hz), 149.7, 146.8, 140.0, 138.7 (d,  $J_{\text{C-F}} = 2.8$  Hz), 136.9, 134.9, 134.2 (d,  $J_{\text{C-F}} = 0.65$  Hz), 133.5, 132.8, 129.8, 129.3, 129.1, 128.4, 128.3 (d,  $J_{\text{C-F}} = 3.2$  Hz), 128.2,

128.16, 128.1, 127.9, 127.4, 127.2, 126.7, 126.5, 121.3, 107.2 (d,  $J_{C-F}$  = 7.7 Hz), 52.1, 34.8 (d,  $J_{C-F}$  = 27.5 Hz).  $^{19}\text{F}$  NMR (376 MHz,  $\text{CDCl}_3$ )  $\delta$  -94.6. HRMS:  $m/z$ :  $[\text{M} + \text{H}]^+$  calculated for  $\text{C}_{30}\text{H}_{22}\text{FNO}_2$ : 448.1707, found 448.1707.

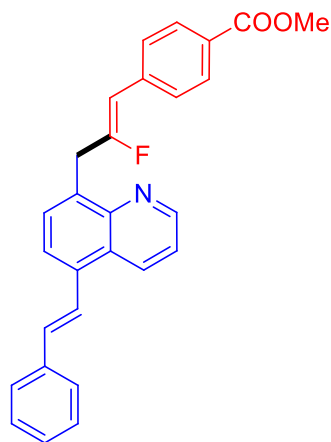

Methyl 4-((*Z*)-2-fluoro-3-(5-((*E*)-styryl)quinolin-8-yl)prop-1-en-1-yl)benzoate (**3ha**)

**3ha** was obtained according to the general procedure in 53% yield (45.0 mg), white solid,  $R_f$  = 0.40 (hexanes/ethyl acetate = 15/1).  $^1\text{H}$  NMR (400 MHz,  $\text{CDCl}_3$ )  $\delta$  8.96 (dd,  $J$  = 4.1, 1.6 Hz, 1H), 8.55 (dd,  $J$  = 8.6, 1.6 Hz, 1H), 7.95 – 7.93 (m, 2H), 7.82 – 7.67 (m, 3H), 7.59 – 7.58 (m, 2H), 7.51 – 7.49 (m, 2H), 7.45 (dd,  $J$  = 8.6, 4.1 Hz, 1H), 7.42 – 7.38 (m, 2H), 7.33 – 7.29 (m, 1H), 7.17 – 7.13 (m, 1H), 5.63 (d,  $J$  = 38.6 Hz, 1H), 4.41 (d,  $J$  = 16.8 Hz, 2H), 3.88 (s, 3H).  $^{13}\text{C}$  NMR (100 MHz,  $\text{CDCl}_3$ )  $\delta$  167.0, 161.8 (d,  $J_{C-F}$  = 269.7 Hz), 149.7, 146.8, 138.6 (d,  $J_{C-F}$  = 2.7 Hz), 137.3, 135.0, 134.3 (d,  $J_{C-F}$  = 1.5 Hz), 132.8, 132.5, 129.8, 129.7, 128.9, 128.3, 128.26, 128.1 (d,  $J_{C-F}$  = 2.2 Hz), 126.9, 126.7, 124.2, 123.7, 121.1, 107.1 (d,  $J_{C-F}$  = 7.6 Hz), 52.1, 34.8 (d,  $J_{C-F}$  = 27.5 Hz).  $^{19}\text{F}$  NMR (376 MHz,  $\text{CDCl}_3$ )  $\delta$  -94.5. HRMS:  $m/z$ :  $[\text{M} + \text{H}]^+$  calculated for  $\text{C}_{28}\text{H}_{22}\text{FNO}_2$ : 424.1707, found 424.1711.

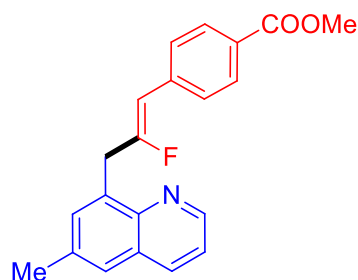

(*Z*)-Methyl 4-(2-fluoro-3-(6-methylquinolin-8-yl)prop-1-en-1-yl)benzoate (**3ia**)

**3ia** was obtained according to the general procedure in 79% yield (52.9 mg), white solid,  $R_f$  = 0.30 (hexanes/ethyl acetate = 25/1).  $^1\text{H}$  NMR (400 MHz,  $\text{CDCl}_3$ )  $\delta$  8.87 (dd,  $J$  = 4.2, 1.7 Hz, 1H), 8.04 (dd,  $J$  = 8.3, 1.7 Hz, 1H), 7.95 – 7.93 (m, 2H), 7.54 (s, 1H), 7.51 – 7.49 (m, 3H), 7.36 (dd,  $J$  = 8.2, 4.2 Hz, 1H), 5.62 (d,  $J$  = 38.6 Hz, 1H), 4.37 (d,  $J$  = 17.1 Hz, 2H), 3.88 (s, 3H), 2.51 (s, 3H).  $^{13}\text{C}$  NMR (100 MHz,  $\text{CDCl}_3$ )  $\delta$  167.0, 161.8 (d,  $J_{C-F}$  = 269.8 Hz), 149.0, 145.2, 138.7 (d,  $J_{C-F}$  = 2.8 Hz), 136.2, 135.7, 134.2 (d,  $J_{C-F}$  = 1.4 Hz), 132.0, 129.7, 128.7, 128.3 (d,  $J_{C-F}$  = 7.8 Hz), 128.1 (d,  $J_{C-F}$  = 2.3 Hz), 126.3, 121.3, 107.0 (d,  $J_{C-F}$  = 7.7 Hz), 52.1, 34.5 (d,  $J_{C-F}$  = 27.5 Hz), 21.7.  $^{19}\text{F}$  NMR (376 MHz,  $\text{CDCl}_3$ )  $\delta$  -94.5.

HRMS:  $m/z$ :  $[M + H]^+$  calculated for  $C_{21}H_{18}FNO_2$ : 336.1394, found 336.1396.

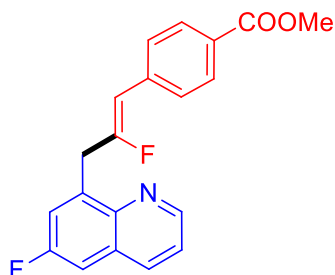

(Z)-Methyl 4-(2-fluoro-3-(6-fluoroquinolin-8-yl)prop-1-en-1-yl)benzoate (**3ja**)

**3ja** was obtained according to the general procedure in 67% yield (45.4 mg), white solid,  $R_f$  = 0.30 (hexanes/ethyl acetate = 25/1).  $^1H$  NMR (400 MHz,  $CDCl_3$ )  $\delta$  8.90 (dd,  $J$  = 4.2, 1.6 Hz, 1H), 8.10 (dd,  $J$  = 8.3, 1.7 Hz, 1H), 7.99 – 7.91 (m, 2H), 7.56 – 7.48 (m, 3H), 7.43 (dd,  $J$  = 8.3, 4.2 Hz, 1H), 7.37 (dd,  $J$  = 8.6, 2.8 Hz, 1H), 5.69 (d,  $J$  = 38.4 Hz, 1H), 4.40 (d,  $J$  = 17.9 Hz, 2H), 3.89 (s, 3H).  $^{13}C$  NMR (100 MHz,  $CDCl_3$ )  $\delta$  167.0, 160.7 (d,  $J_{C-F}$  = 269.4 Hz), 160.1 (d,  $J_{C-F}$  = 246.8 Hz), 149.1 (d,  $J_{C-F}$  = 2.7 Hz), 143.8, 138.3 (d,  $J_{C-F}$  = 2.9 Hz), 138.0 (d,  $J_{C-F}$  = 8.6 Hz), 135.9 (d,  $J_{C-F}$  = 5.5 Hz), 129.8, 129.4 (d,  $J_{C-F}$  = 10.1 Hz), 128.4 (d,  $J_{C-F}$  = 7.7 Hz), 128.36, 122.2, 119.8 (d,  $J_{C-F}$  = 26.2 Hz), 110.1 (d,  $J_{C-F}$  = 21.1 Hz), 107.6 (d,  $J_{C-F}$  = 7.6 Hz), 52.2, 34.5 (d,  $J_{C-F}$  = 27.7 Hz).  $^{19}F$  NMR (376 MHz,  $CDCl_3$ )  $\delta$  -95.6, -113.0.

HRMS:  $m/z$ :  $[M + H]^+$  calculated for  $C_{20}H_{15}FNO_2$ : 340.1144, found 340.1145.

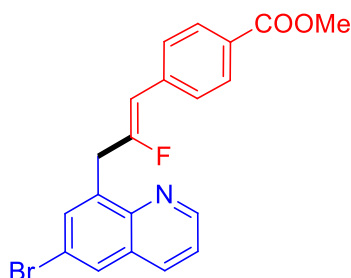

(Z)-Methyl 4-(3-(6-bromoquinolin-8-yl)-2-fluoroprop-1-en-1-yl)benzoate (**3ka**)

**3ka** was obtained according to the general procedure in 63% yield (50.4 mg), white solid,  $R_f$  = 0.30 (hexanes/ethyl acetate = 25/1).  $^1H$  NMR (400 MHz,  $CDCl_3$ )  $\delta$  8.94 (dd,  $J$  = 4.2, 1.7 Hz, 1H), 8.05 (dd,  $J$  = 8.3, 1.7 Hz, 1H), 7.96 – 7.94 (m, 2H), 7.91 (d,  $J$  = 2.1 Hz, 1H), 7.79 (d,  $J$  = 1.1 Hz, 1H), 7.52 – 7.50 (m, 2H), 7.43 (dd,  $J$  = 8.3, 4.2 Hz, 1H), 5.67 (d,  $J$  = 38.4 Hz, 1H), 4.36 (d,  $J$  = 17.6 Hz, 2H), 3.89 (s, 3H).  $^{13}C$  NMR (100 MHz,  $CDCl_3$ )  $\delta$  167.0, 160.7 (d,  $J_{C-F}$  = 269.5 Hz), 150.1, 145.3, 138.3 (d,  $J_{C-F}$  = 2.9 Hz), 137.0, 135.5, 132.9, 129.8, 129.7, 129.4, 128.4 (d,  $J_{C-F}$  = 7.7 Hz), 128.3, 122.2, 120.3, 107.6 (d,  $J_{C-F}$  = 7.6 Hz), 52.1, 34.3 (d,  $J_{C-F}$  = 27.7 Hz).  $^{19}F$  NMR (376 MHz,  $CDCl_3$ )  $\delta$  -95.5. HRMS:  $m/z$ :  $[M + H]^+$  calculated for  $C_{20}H_{15}BrFNO_2$ : 400.0343, found 400.0341.

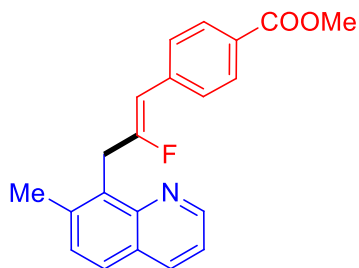

(Z)-Methyl 4-(2-fluoro-3-(7-methylquinolin-8-yl)prop-1-en-1-yl)benzoate (**3la**)

**3la** was obtained according to the general procedure in 30% yield (20.1 mg), white solid,  $R_f = 0.30$  (hexanes/ethyl acetate = 25/1).  $^1\text{H}$  NMR (400 MHz,  $\text{CDCl}_3$ )  $\delta$  8.93 (dd,  $J = 4.2, 1.8$  Hz, 1H), 8.13 (dd,  $J = 8.2, 1.8$  Hz, 1H), 7.90 – 7.88 (m, 2H), 7.71 (d,  $J = 8.4$  Hz, 1H), 7.45 – 7.40 (m, 3H), 7.37 (dd,  $J = 8.2, 4.2$  Hz, 1H), 5.24 (d,  $J = 39.2$  Hz, 1H), 4.50 (d,  $J = 10.1$  Hz, 2H), 3.87 (s, 3H), 2.61 (s, 3H).  $^{13}\text{C}$  NMR (100 MHz,  $\text{CDCl}_3$ )  $\delta$  167.1, 161.8 (d,  $J_{\text{C-F}} = 270.6$  Hz), 150.0, 147.1, 138.8 (d,  $J_{\text{C-F}} = 2.7$  Hz), 138.8, 136.2, 131.6 (d,  $J_{\text{C-F}} = 6.9$  Hz), 129.9, 129.7, 128.2 (d,  $J_{\text{C-F}} = 7.8$  Hz), 127.9 (d,  $J_{\text{C-F}} = 2.4$  Hz), 126.9, 126.9, 120.5, 105.5 (d,  $J_{\text{C-F}} = 7.6$  Hz), 52.1, 30.8 (d,  $J_{\text{C-F}} = 28.9$  Hz), 20.4.  $^{19}\text{F}$  NMR (376 MHz,  $\text{CDCl}_3$ )  $\delta$  -93.1. HRMS:  $m/z$ :  $[\text{M} + \text{H}]^+$  calculated for  $\text{C}_{21}\text{H}_{18}\text{FNO}_2$ : 336.1394, found 336.1394.

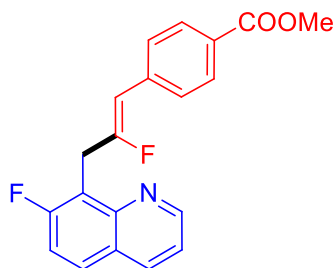

(Z)-Methyl 4-(2-fluoro-3-(7-fluoroquinolin-8-yl)prop-1-en-1-yl)benzoate (**3ma**)

**3ma** was obtained according to the general procedure in 90% yield (61.0 mg), white solid,  $R_f = 0.30$  (hexanes/ethyl acetate = 25/1).  $^1\text{H}$  NMR (400 MHz,  $\text{CDCl}_3$ )  $\delta$  8.96 (dd,  $J = 4.2, 1.7$  Hz, 1H), 8.13 (dd,  $J = 8.3, 1.7$  Hz, 1H), 7.91 – 7.89 (m, 2H), 7.76 (dd,  $J = 9.0, 6.1$  Hz, 1H), 7.45 – 7.43 (m, 2H), 7.41 – 7.34 (m, 2H), 5.51 (d,  $J = 38.5$  Hz, 1H), 4.41 (d,  $J = 13.1$  Hz, 2H), 3.86 (s, 3H).  $^{13}\text{C}$  NMR (100 MHz,  $\text{CDCl}_3$ )  $\delta$  167.0, 161.3 (d,  $J_{\text{C-F}} = 248.2$  Hz), 160.7 (dd,  $J_{\text{C-F}} = 270.3, 1.0$  Hz), 150.9, 147.5 (d,  $J_{\text{C-F}} = 8.9$  Hz), 138.6 (d,  $J_{\text{C-F}} = 2.8$  Hz), 136.3 (d,  $J_{\text{C-F}} = 1.2$  Hz), 129.7, 128.9 (d,  $J_{\text{C-F}} = 10.5$  Hz), 128.2 (d,  $J_{\text{C-F}} = 7.8$  Hz), 128.0 (d,  $J_{\text{C-F}} = 2.4$  Hz), 125.5 (d,  $J_{\text{C-F}} = 0.8$  Hz), 120.6 (d,  $J_{\text{C-F}} = 2.5$  Hz), 118.9 (dd,  $J_{\text{C-F}} = 14.6, 4.2$  Hz), 117.0 (d,  $J_{\text{C-F}} = 26.3$  Hz), 106.0 (d,  $J_{\text{C-F}} = 7.4$  Hz), 52.1, 27.4 (dd,  $J_{\text{C-F}} = 29.9, 3.2$  Hz).  $^{19}\text{F}$  NMR (376 MHz,  $\text{CDCl}_3$ )  $\delta$  -95.0 (d,  $J = 5.5$  Hz, 1F), -110.9 (d,  $J = 5.5$  Hz, 1F). HRMS:  $m/z$ :  $[\text{M} + \text{H}]^+$  calculated for  $\text{C}_{20}\text{H}_{15}\text{F}_2\text{NO}_2$ : 340.1144, found 340.1146.



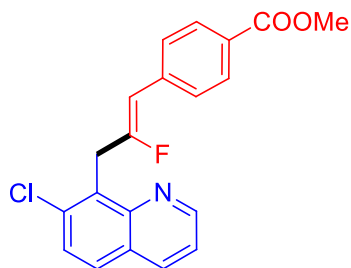

(Z)-Methyl 4-(3-(7-chloroquinolin-8-yl)-2-fluoroprop-1-en-1-yl)benzoate (**3na**)

**3na** was obtained according to the general procedure in 92% yield (65.2 mg), white solid,  $R_f = 0.3$  (hexanes/ethyl acetate = 25/1).  $^1\text{H}$  NMR (400 MHz,  $\text{CDCl}_3$ )  $\delta$  8.87 (dd,  $J = 4.2, 1.7$  Hz, 1H), 8.03 (dd,  $J = 8.3, 1.7$  Hz, 1H), 7.81 – 7.79 (m, 2H), 7.62 – 7.60 (m, 1H), 7.48 – 7.46 (m, 1H), 7.37 – 7.29 (m, 3H), 5.26 (d,  $J = 38.8$  Hz, 1H), 4.49 (d,  $J = 11.1$  Hz, 2H), 3.77 (s, 3H).  $^{13}\text{C}$  NMR (100 MHz,  $\text{CDCl}_3$ )  $\delta$  167.0, 160.5 (d,  $J_{\text{C-F}} = 270.6$  Hz), 150.9, 147.4, 138.6 (d,  $J_{\text{C-F}} = 2.8$  Hz), 136.3, 136.1, 132.1 (d,  $J_{\text{C-F}} = 6.0$  Hz), 129.7, 128.3, 128.24, 128.2, 128.0 (d,  $J_{\text{C-F}} = 2.3$  Hz), 127.1, 121.4, 106.1 (d,  $J_{\text{C-F}} = 7.4$  Hz), 52.1, 31.7 (d,  $J_{\text{C-F}} = 30.1$  Hz).  $^{19}\text{F}$  NMR (376 MHz,  $\text{CDCl}_3$ )  $\delta$  -94.5. HRMS:  $m/z$ :  $[\text{M} + \text{H}]^+$  calculated for  $\text{C}_{20}\text{H}_{15}\text{ClFNO}_2$ : 356.0848, found 356.0849.

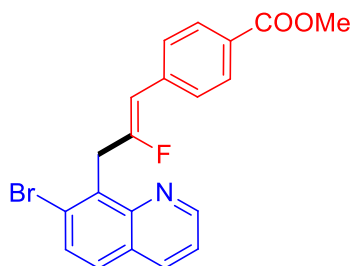

(Z)-Methyl 4-(3-(7-bromoquinolin-8-yl)-2-fluoroprop-1-en-1-yl)benzoate (**3oa**)

**3oa** was obtained according to the general procedure in 94% yield (75.0 mg), white solid,  $R_f = 0.30$  (hexanes/ethyl acetate = 15/1).  $^1\text{H}$  NMR (400 MHz,  $\text{CDCl}_3$ )  $\delta$  8.94 (dd,  $J = 4.2, 1.7$  Hz, 1H), 8.11 (dd,  $J = 8.3, 1.6$  Hz, 1H), 7.90 – 7.89 (m, 2H), 7.73 – 7.71 (m, 1H), 7.63 – 7.61 (m, 1H), 7.43 – 7.40 (m, 3H), 5.32 (d,  $J = 38.9$  Hz, 1H), 4.61 (d,  $J = 10.5$  Hz, 2H), 3.86 (s, 3H).  $^{13}\text{C}$  NMR (100 MHz,  $\text{CDCl}_3$ )  $\delta$  167.0, 160.5 (d,  $J_{\text{C-F}} = 270.7$  Hz), 150.8, 147.4, 138.6 (d,  $J_{\text{C-F}} = 2.7$  Hz), 136.3, 134.2 (d,  $J_{\text{C-F}} = 6.7$  Hz), 131.1, 129.6, 128.4, 128.2 (d,  $J_{\text{C-F}} = 7.8$  Hz), 127.9 (d,  $J_{\text{C-F}} = 2.4$  Hz), 127.4, 126.9, 121.6, 106.2 (d,  $J_{\text{C-F}} = 7.3$  Hz), 52.1, 34.4 (d,  $J_{\text{C-F}} = 30.0$  Hz).  $^{19}\text{F}$  NMR (376 MHz,  $\text{CDCl}_3$ )  $\delta$  -94.5. HRMS:  $m/z$ :  $[\text{M} + \text{H}]^+$  calculated for  $\text{C}_{20}\text{H}_{15}\text{BrFNO}_2$ : 400.0343, found 400.0344.

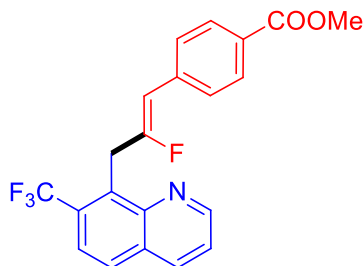

(Z)-Methyl 4-(2-fluoro-3-(7-(trifluoromethyl)quinolin-8-yl)prop-1-en-1-yl)benzoate (**3pa**)

**3pa** was obtained according to the general procedure in 74% yield (57.6 mg), white solid,  $R_f = 0.40$  (hexanes/ethyl acetate = 15/1).  $^1\text{H}$  NMR (400 MHz,  $\text{CDCl}_3$ )  $\delta$  9.03 (dd,  $J = 3.9, 1.5$  Hz, 1H), 8.20 (dd,  $J = 8.3, 1.3$  Hz, 1H), 7.91 – 7.82 (m, 4H), 7.52 (dd,  $J = 8.3, 4.1$  Hz, 1H), 7.39 – 7.37 (m, 2H), 5.15 (d,  $J = 38.8$  Hz, 1H), 4.67 (d,  $J = 9.0$  Hz, 2H), 3.86 (s, 3H).  $^{13}\text{C}$  NMR (100 MHz,  $\text{CDCl}_3$ )  $\delta$  167.0, 161.5 (d,  $J_{\text{C-F}} = 270.5$  Hz), 151.2, 146.7, 138.6 (d,  $J_{\text{C-F}} = 2.6$  Hz), 136.3, 134.5 (m), 130.1 (q,  $J_{\text{C-F}} = 30.0$  Hz), 129.8, 129.6, 128.2, 128.1, 128.0 (d,  $J_{\text{C-F}} = 2.3$  Hz), 124.4 (q,  $J_{\text{C-F}} = 273.3$  Hz), 123.1, 122.9 (q,  $J_{\text{C-F}} = 5.4$  Hz), 106.4 (d,  $J_{\text{C-F}} = 7.6$  Hz), 52.1, 30.9 (dq,  $J_{\text{C-F}} = 30.9, 1.9$  Hz).  $^{19}\text{F}$  NMR (376 MHz,  $\text{CDCl}_3$ )  $\delta$  -58.5 (d,  $J = 3.5$  Hz, 3F), -93.3 (q,  $J = 3.5$  Hz, 1F). HRMS:  $m/z$ :  $[\text{M} + \text{H}]^+$  calculated for  $\text{C}_{21}\text{H}_{15}\text{F}_4\text{NO}_2$ : 390.1112, found 390.1115.

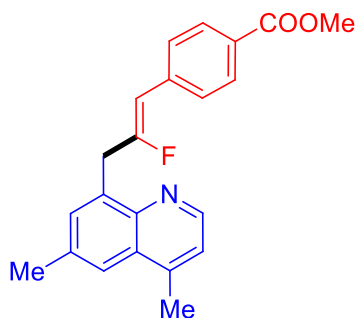

(Z)-Methyl 4-(3-(4,6-dimethylquinolin-8-yl)-2-fluoroprop-1-en-1-yl)benzoate (**3pa**)

**3qa** was obtained according to the general procedure in 42% yield (29.1 mg), white solid,  $R_f = 0.30$  (hexanes/ethyl acetate = 15/1).  $^1\text{H}$  NMR (400 MHz,  $\text{CDCl}_3$ )  $\delta$  8.73 (d,  $J = 4.3$  Hz, 1H), 7.95 – 7.93 (m, 2H), 7.72 (s, 1H), 7.55 (s, 1H), 7.51 – 7.49 (m, 2H), 7.22 (d,  $J = 4.3$  Hz, 1H), 5.61 (d,  $J = 38.6$  Hz, 1H), 4.38 (d,  $J = 17.0$  Hz, 2H), 3.89 (s, 3H), 2.69 (s, 3H), 2.56 (s, 3H).  $^{13}\text{C}$  NMR (100 MHz,  $\text{CDCl}_3$ )  $\delta$  167.1, 162.0 (d,  $J_{\text{C-F}} = 269.8$  Hz), 148.6, 144.9, 143.9, 138.8 (d,  $J_{\text{C-F}} = 2.7$  Hz), 135.9, 134.7 (d,  $J_{\text{C-F}} = 1.3$  Hz), 134.2, 131.7, 129.8, 128.7, 128.3 (d,  $J_{\text{C-F}} = 7.8$  Hz), 128.1 (d,  $J_{\text{C-F}} = 2.4$  Hz), 122.3 (d,  $J_{\text{C-F}} = 21.3$  Hz), 107.0 (d,  $J_{\text{C-F}} = 7.7$  Hz), 52.1, 34.9 (d,  $J_{\text{C-F}} = 27.4$  Hz), 22.1, 19.1.  $^{19}\text{F}$  NMR (376 MHz,  $\text{CDCl}_3$ )  $\delta$  -94.5. HRMS:  $m/z$ :  $[\text{M} + \text{H}]^+$  calculated for  $\text{C}_{22}\text{H}_{20}\text{FNO}_2$ : 350.1551, found 350.1550.

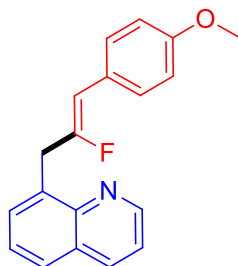

(Z)-8-(2-Fluoro-3-(4-methoxyphenyl)allyl)quinoline (**3ab**)

**3ab** was obtained according to the general procedure in 63% yield (37.2 mg), white solid,  $R_f = 0.20$  (hexanes/ethyl acetate = 25/1).  $^1\text{H}$  NMR (400 MHz,  $\text{CDCl}_3$ )  $\delta$  8.95 (dd,  $J = 4.2, 1.7$  Hz, 1H), 8.14 (dd,  $J = 8.3, 1.7$  Hz, 1H), 7.74 (d,  $J = 7.8$  Hz, 2H), 7.56 – 7.47 (m, 1H), 7.45 – 7.35 (m, 3H), 6.83 – 6.80 (m, 2H), 5.55 (d,  $J = 39.4$  Hz, 1H), 4.38 (d,  $J = 17.9$  Hz, 2H), 3.77 (s, 3H).  $^{13}\text{C}$  NMR (100 MHz,  $\text{CDCl}_3$ )  $\delta$

158.41 (d,  $J_{\text{C-F}} = 2.8$  Hz), 158.4 (d,  $J_{\text{C-F}} = 263.1$  Hz), 149.8, 146.7, 136.5, 135.4, 129.7 (d,  $J_{\text{C-F}} = 7.5$  Hz), 129.5, 128.6, 127.2, 126.7 (d,  $J_{\text{C-F}} = 2.6$  Hz), 126.5, 121.2, 113.9, 107.2 (d,  $J_{\text{C-F}} = 8.5$  Hz), 55.3, 34.4 (d,  $J_{\text{C-F}} = 28.0$  Hz).  $^{19}\text{F}$  NMR (376 MHz,  $\text{CDCl}_3$ )  $\delta$  -101.9. HRMS:  $m/z$ :  $[\text{M} + \text{H}]^+$  calculated for  $\text{C}_{19}\text{H}_{16}\text{FNO}$ : 294.1289, found 294.1286.

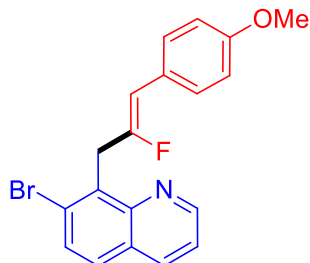

(*Z*)-7-Bromo-8-(2-fluoro-3-(4-methoxyphenyl)allyl)quinoline (**3ob**)

**3ob** was obtained according to the general procedure in 74% yield (54.7 mg), white solid,  $R_f = 0.30$  (hexanes/ethyl acetate = 25/1).  $^1\text{H}$  NMR (400 MHz,  $\text{CDCl}_3$ )  $\delta$  8.95 (dd,  $J = 4.1, 1.6$  Hz, 1H), 8.11 (dd,  $J = 8.2, 1.5$  Hz, 1H), 7.73 – 7.71 (m, 1H), 7.62 – 7.60 (m, 1H), 7.42 (dd,  $J = 8.2, 4.2$  Hz, 1H), 7.33 – 7.31 (m, 2H), 6.78 – 6.76 (m, 2H), 5.23 (d,  $J = 39.8$  Hz, 1H), 4.58 (d,  $J = 10.9$  Hz, 2H), 3.74 (s, 3H).  $^{13}\text{C}$  NMR (100 MHz,  $\text{CDCl}_3$ )  $\delta$  158.3 (d,  $J_{\text{C-F}} = 2.7$  Hz), 157.2 (d,  $J_{\text{C-F}} = 264.2$  Hz), 150.7, 147.6, 136.3, 134.9 (d,  $J_{\text{C-F}} = 6.2$  Hz), 131.2, 129.7 (d,  $J_{\text{C-F}} = 7.5$  Hz), 128.2, 127.5, 126.9, 126.8 (d,  $J_{\text{C-F}} = 2.5$  Hz), 121.5, 113.8, 106.3 (d,  $J_{\text{C-F}} = 8.2$  Hz), 55.3, 34.3 (d,  $J_{\text{C-F}} = 30.5$  Hz).  $^{19}\text{F}$  NMR (376 MHz,  $\text{CDCl}_3$ )  $\delta$  -101.7. HRMS:  $m/z$ :  $[\text{M} + \text{H}]^+$  calculated for  $\text{C}_{19}\text{H}_{15}\text{BrFNO}$ : 372.0394, found 372.0397.

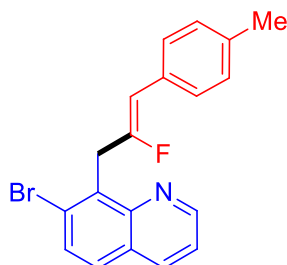

(*Z*)-7-Bromo-8-(2-fluoro-3-(p-tolyl)allyl)quinoline (**3oc**)

**3oc** was obtained according to the general procedure in 98% yield (69.5 mg), white solid,  $R_f = 0.30$  (hexanes/ethyl acetate = 25/1).  $^1\text{H}$  NMR (400 MHz,  $\text{CDCl}_3$ )  $\delta$  8.94 (dd,  $J = 4.2, 1.8$  Hz, 1H), 8.09 (dd,  $J = 8.3, 1.8$  Hz, 1H), 7.72 – 7.70 (m, 1H), 7.61 – 7.58 (m, 1H), 7.40 (dd,  $J = 8.2, 4.2$  Hz, 1H), 7.28 – 7.26 (m, 2H), 7.04 – 7.02 (m, 2H), 5.25 (d,  $J = 39.8$  Hz, 1H), 4.58 (d,  $J = 10.8$  Hz, 2H), 2.26 (s, 3H).  $^{13}\text{C}$  NMR (100 MHz,  $\text{CDCl}_3$ )  $\delta$  157.9 (d,  $J_{\text{C-F}} = 265.6$  Hz), 150.7, 147.6, 136.4 (d,  $J_{\text{C-F}} = 2.4$  Hz), 136.3, 134.8 (d,  $J_{\text{C-F}} = 6.2$  Hz), 131.2, 131.1 (d,  $J_{\text{C-F}} = 2.5$  Hz), 129.1, 128.3 (d,  $J_{\text{C-F}} = 7.3$  Hz), 128.2, 127.4, 126.9, 121.5, 106.7 (d,  $J_{\text{C-F}} = 8.0$  Hz), 34.3 (d,  $J_{\text{C-F}} = 30.5$  Hz), 21.3.  $^{19}\text{F}$  NMR (376 MHz,  $\text{CDCl}_3$ )  $\delta$  -99.8. HRMS:  $m/z$ :  $[\text{M} + \text{H}]^+$  calculated for  $\text{C}_{19}\text{H}_{15}\text{BrFN}$ : 356.0445, found 372.0442.

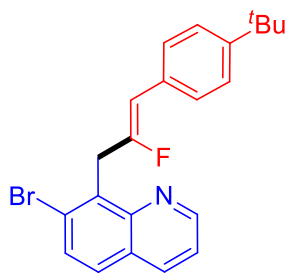

(Z)-7-Bromo-8-(3-(4-(tert-butyl)phenyl)-2-fluoroallyl)quinoline (**3od**)

**3od** was obtained according to the general procedure in 97% yield (77.0 mg), white solid,  $R_f = 0.30$  (hexanes/ethyl acetate = 25/1).  $^1\text{H}$  NMR (400 MHz,  $\text{CDCl}_3$ )  $\delta$  8.93 (dd,  $J = 4.2, 1.7$  Hz, 1H), 8.09 (dd,  $J = 8.2, 1.7$  Hz, 1H), 7.72 – 7.70 (m, 1H), 7.61 – 7.58 (m, 1H), 7.39 (dd,  $J = 8.2, 4.2$  Hz, 1H), 7.33 – 7.31 (m, 2H), 7.26 – 7.24 (m, 2H), 5.27 (d,  $J = 39.8$  Hz, 1H), 4.59 (d,  $J = 10.9$  Hz, 2H), 1.26 (s, 9H).  $^{13}\text{C}$  NMR (100 MHz,  $\text{CDCl}_3$ )  $\delta$  158.1 (d,  $J_{\text{C-F}} = 265.8$  Hz), 150.7, 149.6 (d,  $J_{\text{C-F}} = 2.1$  Hz), 147.6, 136.3, 134.8 (d,  $J_{\text{C-F}} = 6.1$  Hz), 131.2, 131.17, 128.2 (d,  $J_{\text{C-F}} = 1.6$  Hz), 128.1, 127.4, 126.9, 125.3, 121.5, 106.6 (d,  $J_{\text{C-F}} = 8.0$  Hz), 34.6, 34.4 (d,  $J_{\text{C-F}} = 30.4$  Hz), 31.4.  $^{19}\text{F}$  NMR (376 MHz,  $\text{CDCl}_3$ )  $\delta$  -99.8. HRMS:  $m/z$ :  $[\text{M} + \text{H}]^+$  calculated for  $\text{C}_{22}\text{H}_{21}\text{BrFN}$ : 398.0914, found 398.0912.

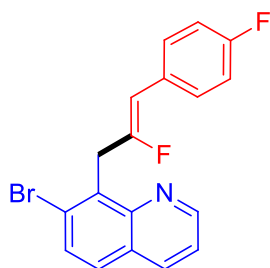

(Z)-7-Bromo-8-(2-fluoro-3-(4-fluorophenyl)allyl)quinoline (**3oe**)

**3oe** was obtained according to the general procedure in 75% yield (54.1 mg), white solid,  $R_f = 0.30$  (hexanes/ethyl acetate = 25/1).  $^1\text{H}$  NMR (400 MHz,  $\text{CDCl}_3$ )  $\delta$  8.96 (d,  $J = 2.7$  Hz, 1H), 8.13 (d,  $J = 8.1$  Hz, 1H), 7.75 – 7.72 (m, 1H), 7.64 – 7.62 (m, 1H), 7.43 (dd,  $J = 8.2, 4.1$  Hz, 1H), 7.34 – 7.32 (m, 2H), 6.93 – 6.89 (m, 2H), 5.24 (d,  $J = 39.1$  Hz, 1H), 4.59 (d,  $J = 10.7$  Hz, 2H).  $^{13}\text{C}$  NMR (100 MHz,  $\text{CDCl}_3$ )  $\delta$  161.5 (dd,  $J_{\text{C-F}} = 244.7, 3.3$  Hz), 158.3 (dd,  $J_{\text{C-F}} = 266.0, 2.3$  Hz), 150.8, 147.5, 136.4, 134.6 (d,  $J_{\text{C-F}} = 6.5$  Hz), 131.2, 130.02, 130.0 (d,  $J_{\text{C-F}} = 15.4$  Hz), 128.3, 127.5, 126.9, 121.6, 115.2 (d,  $J_{\text{C-F}} = 21.2$  Hz), 105.8 (d,  $J_{\text{C-F}} = 8.0$  Hz), 34.3 (d,  $J_{\text{C-F}} = 30.4$  Hz).  $^{19}\text{F}$  NMR (376 MHz,  $\text{CDCl}_3$ )  $\delta$  -100.0 (d,  $J = 1.0$  Hz, 1F), -115.2 (d,  $J = 1.0$  Hz, 1F). HRMS:  $m/z$ :  $[\text{M} + \text{H}]^+$  calculated for  $\text{C}_{18}\text{H}_{12}\text{BrF}_2\text{N}$ : 360.0194, found 360.0193.

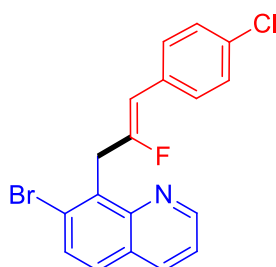

(Z)-7-bromo-8-(3-(4-chlorophenyl)-2-fluoroallyl)quinoline (**3of**)

**3of** was obtained according to the general procedure in 97% yield (73.2 mg), white solid,  $R_f = 0.30$  (hexanes/ethyl acetate = 25/1).  $^1\text{H}$  NMR (400 MHz,  $\text{CDCl}_3$ )  $\delta$  8.95 (d,  $J = 2.7$  Hz, 1H), 8.12 (d,  $J = 8.1$  Hz, 1H), 7.74 – 7.71 (m, 1H), 7.64 – 7.61 (m, 1H), 7.42 (dd,  $J = 8.1, 4.1$  Hz, 1H), 7.30 – 7.28 (m, 2H), 7.19 – 7.17 (d,  $J = 8.3$  Hz, 2H), 5.23 (d,  $J = 38.9$  Hz, 1H), 4.59 (d,  $J = 10.6$  Hz, 2H).  $^{13}\text{C}$  NMR (100 MHz,  $\text{CDCl}_3$ )  $\delta$  159.0 (d,  $J_{\text{C-F}} = 267.6$  Hz), 150.7, 147.4, 136.3, 134.4 (d,  $J_{\text{C-F}} = 6.5$  Hz), 132.4 (d,  $J_{\text{C-F}} = 2.5$  Hz), 132.1 (d,  $J_{\text{C-F}} = 3.4$  Hz), 131.1, 129.6 (d,  $J_{\text{C-F}} = 7.6$  Hz), 128.4, 128.2, 127.4, 126.8, 121.5, 105.7 (d,  $J_{\text{C-F}} = 7.8$  Hz), 34.3 (d,  $J_{\text{C-F}} = 30.2$  Hz).  $^{19}\text{F}$  NMR (376 MHz,  $\text{CDCl}_3$ )  $\delta$  -97.7. HRMS:  $m/z$ :  $[\text{M} + \text{H}]^+$  calculated for  $\text{C}_{18}\text{H}_{12}\text{BrClFN}$ : 375.9898, found 375.9898.

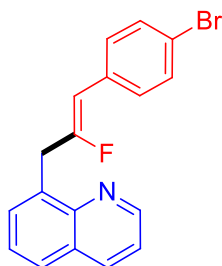

(Z)-8-(3-(4-Bromophenyl)-2-fluoroallyl)quinoline (**3ag**)

**3ag** was obtained according to the general procedure in 67% yield (46.1 mg), white solid,  $R_f = 0.40$  (hexanes/ethyl acetate = 25/1).  $^1\text{H}$  NMR (400 MHz,  $\text{CDCl}_3$ )  $\delta$  8.94 (dd,  $J = 4.2, 1.7$  Hz, 1H), 8.15 (dd,  $J = 8.3, 1.7$  Hz, 1H), 7.76 – 7.70 (m, 2H), 7.55 – 7.48 (m, 1H), 7.44 – 7.35 (m, 3H), 7.31 – 7.29 (m, 2H), 5.52 (d,  $J = 38.6$  Hz, 1H), 4.37 (d,  $J = 17.2$  Hz, 2H).  $^{13}\text{C}$  NMR (100 MHz,  $\text{CDCl}_3$ )  $\delta$  160.5 (d,  $J_{\text{C-F}} = 266.9$  Hz), 149.9, 146.6, 136.5, 134.9 (d,  $J_{\text{C-F}} = 1.2$  Hz), 132.9 (d,  $J_{\text{C-F}} = 2.7$  Hz), 131.5, 130.0 (d,  $J_{\text{C-F}} = 7.7$  Hz), 129.7, 128.6, 127.4, 126.4, 121.3, 120.5 (d,  $J_{\text{C-F}} = 3.5$  Hz), 106.7 (d,  $J_{\text{C-F}} = 8.0$  Hz), 34.5 (d,  $J_{\text{C-F}} = 27.7$  Hz).  $^{19}\text{F}$  NMR (376 MHz,  $\text{CDCl}_3$ )  $\delta$  -97.5. HRMS:  $m/z$ :  $[\text{M} + \text{H}]^+$  calculated for  $\text{C}_{18}\text{H}_{13}\text{BrFN}$ : 342.0288, found 342.0288.

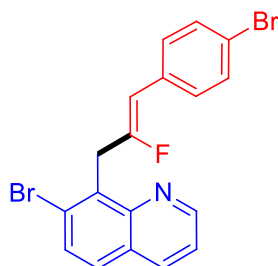

(Z)-7-bromo-8-(3-(4-bromophenyl)-2-fluoroallyl)quinoline (**3og**)

**3og** was obtained according to the general procedure in 96% yield (80.8 mg), white solid,  $R_f = 0.30$  (hexanes/ethyl acetate = 25/1).  $^1\text{H}$  NMR (400 MHz,  $\text{CDCl}_3$ )  $\delta$  8.94 (dd,  $J = 4.2, 1.7$  Hz, 1H), 8.10 (dd,  $J = 8.3, 1.7$  Hz, 1H), 7.72 – 7.70 (m, 1H), 7.62 – 7.60 (m, 1H), 7.41 (dd,  $J = 8.2, 4.2$  Hz, 1H), 7.33 – 7.31 (m, 2H), 7.23 – 7.21 (m, 2H), 5.22 (d,  $J = 38.9$  Hz, 1H), 4.57 (d,  $J = 10.7$  Hz, 2H).  $^{13}\text{C}$  NMR (100 MHz,  $\text{CDCl}_3$ )  $\delta$  159.2 (d,  $J_{\text{C-F}} = 267.9$  Hz), 150.8, 147.5, 136.4, 134.4 (d,  $J_{\text{C-F}} = 6.6$  Hz), 132.9 (d,  $J_{\text{C-F}}$

= 2.5 Hz), 131.4, 131.2, 130.0 (d,  $J_{\text{C-F}} = 7.6$  Hz), 128.3, 127.4, 126.9, 121.6, 120.3 (d,  $J_{\text{C-F}} = 3.4$  Hz), 105.9 (d,  $J_{\text{C-F}} = 7.7$  Hz), 34.4 (d,  $J_{\text{C-F}} = 30.1$  Hz).  $^{19}\text{F}$  NMR (376 MHz,  $\text{CDCl}_3$ )  $\delta$  -97.3. HRMS:  $m/z$ :  $[\text{M} + \text{H}]^+$  calculated for  $\text{C}_{18}\text{H}_{12}\text{Br}_2\text{FN}$ : 419.9393, found 419.9393.

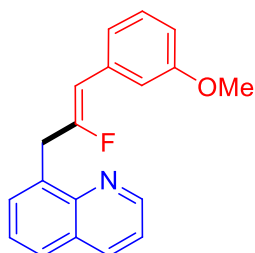

(*Z*)-8-(2-fluoro-3-(3-methoxyphenyl)allyl)quinoline (**3ah**)

**3ah** was obtained according to the general procedure in 79% yield (46.4 mg), white solid,  $R_f = 0.30$  (hexanes/ethyl acetate = 25/1).  $^1\text{H}$  NMR (400 MHz,  $\text{CDCl}_3$ )  $\delta$  8.94 (dd,  $J = 4.2, 1.7$  Hz, 1H), 8.14 (dd,  $J = 8.3, 1.7$  Hz, 1H), 7.75 – 7.732 (m, 2H), 7.53 – 7.49 (m, 1H), 7.40 (dd,  $J = 8.3, 4.2$  Hz, 1H), 7.21 – 7.17 (m, 1H), 7.07 – 7.06 (m, 1H), 7.03 (d,  $J = 7.7$  Hz, 1H), 6.74 (dd,  $J = 8.0, 2.2$  Hz, 1H), 5.59 (d,  $J = 38.9$  Hz, 1H), 4.39 (d,  $J = 17.7$  Hz, 2H), 3.76 (s, 3H).  $^{13}\text{C}$  NMR (100 MHz,  $\text{CDCl}_3$ )  $\delta$  160.0 (d,  $J_{\text{C-F}} = 266.3$  Hz), 158.6, 149.8, 146.7, 136.4, 135.2 (d,  $J_{\text{C-F}} = 2.6$  Hz), 135.1 (d,  $J_{\text{C-F}} = 1.0$  Hz), 129.6, 129.4, 128.6, 127.3, 126.4, 121.3, 121.1 (d,  $J_{\text{C-F}} = 6.9$  Hz), 113.6 (d,  $J_{\text{C-F}} = 8.2$  Hz), 112.8 (d,  $J_{\text{C-F}} = 2.0$  Hz), 107.7 (d,  $J_{\text{C-F}} = 7.8$  Hz), 55.3, 34.5 (d,  $J_{\text{C-F}} = 27.8$  Hz).  $^{19}\text{F}$  NMR (376 MHz,  $\text{CDCl}_3$ )  $\delta$  -98.1. HRMS:  $m/z$ :  $[\text{M} + \text{H}]^+$  calculated for  $\text{C}_{19}\text{H}_{16}\text{FNO}$ : 294.1289, found 294.1290.

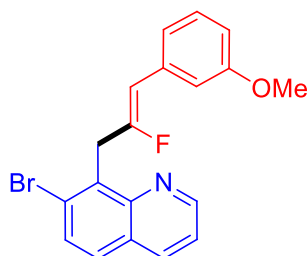

(*Z*)-7-Bromo-8-(2-fluoro-3-(3-methoxyphenyl)allyl)quinoline (**3oh**)

**3oh** was obtained according to the general procedure in 86% yield (63.8 mg), white solid,  $R_f = 0.30$  (hexanes/ethyl acetate = 25/1).  $^1\text{H}$  NMR (400 MHz,  $\text{CDCl}_3$ )  $\delta$  8.95 (dd,  $J = 4.2, 1.7$  Hz, 1H), 8.11 (dd,  $J = 8.3, 1.7$  Hz, 1H), 7.73 – 7.71 (m, 1H), 7.63 – 7.61 (m, 1H), 7.42 (dd,  $J = 8.2, 4.2$  Hz, 1H), 7.16 – 7.12 (m, 1H), 6.98 – 6.97 (m, 1H), 6.94 (d,  $J = 7.8$  Hz, 1H), 6.70 (dd,  $J = 8.0, 2.2$  Hz, 1H), 5.27 (d,  $J = 39.2$  Hz, 1H), 4.60 (d,  $J = 10.9$  Hz, 2H), 3.73 (s, 3H).  $^{13}\text{C}$  NMR (100 MHz,  $\text{CDCl}_3$ )  $\delta$  159.6, 158.7 (d,  $J_{\text{C-F}} = 267.2$  Hz), 150.8, 147.6, 136.3, 135.2 (d,  $J_{\text{C-F}} = 2.5$  Hz), 134.6 (d,  $J_{\text{C-F}} = 6.2$  Hz), 131.2, 129.2, 128.3, 127.5, 126.9, 121.5, 121.1 (d,  $J_{\text{C-F}} = 6.9$  Hz), 113.5 (d,  $J_{\text{C-F}} = 8.6$  Hz), 112.8 (d,  $J_{\text{C-F}} = 2.0$  Hz), 106.8 (d,  $J_{\text{C-F}} = 7.4$  Hz), 55.3, 34.4 (d,  $J_{\text{C-F}} = 30.3$  Hz).  $^{19}\text{F}$  NMR (376 MHz,  $\text{CDCl}_3$ )  $\delta$  -98.0. HRMS:  $m/z$ :  $[\text{M} + \text{H}]^+$  calculated for  $\text{C}_{19}\text{H}_{15}\text{BrFNO}$ : 372.0394, found 372.0393.

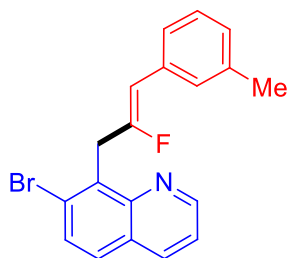

(Z)-7-Bromo-8-(2-fluoro-3-(m-tolyl)allyl)quinoline (**3oi**)

**3oi** was obtained according to the general procedure in 90% yield (64.3 mg), white solid,  $R_f = 0.30$  (hexanes/ethyl acetate = 25/1).  $^1\text{H}$  NMR (400 MHz,  $\text{CDCl}_3$ )  $\delta$  8.94 (dd,  $J = 4.2, 1.8$  Hz, 1H), 8.09 (dd,  $J = 8.3, 1.7$  Hz, 1H), 7.72 – 7.70 (m, 1H), 7.61 – 7.59 (m, 1H), 7.40 (dd,  $J = 8.2, 4.2$  Hz, 1H), 7.20 – 7.19 (m, 2H), 7.14 – 7.10 (m, 1H), 6.94 (d,  $J = 7.4$  Hz, 1H), 5.26 (d,  $J = 39.7$  Hz, 1H), 4.59 (d,  $J = 10.8$  Hz, 2H), 2.25 (s, 3H).  $^{13}\text{C}$  NMR (100 MHz,  $\text{CDCl}_3$ )  $\delta$  158.4 (d,  $J_{\text{C-F}} = 266.5$  Hz), 150.7, 147.6, 137.8, 136.3, 134.8 (d,  $J_{\text{C-F}} = 6.3$  Hz), 133.9 (d,  $J_{\text{C-F}} = 2.6$  Hz), 131.2, 129.1 (d,  $J_{\text{C-F}} = 7.1$  Hz), 128.3, 128.2, 127.5 (d,  $J_{\text{C-F}} = 2.2$  Hz), 127.4, 126.9, 125.6 (d,  $J_{\text{C-F}} = 7.4$  Hz), 121.5, 106.9 (d,  $J_{\text{C-F}} = 7.5$  Hz), 34.4 (d,  $J_{\text{C-F}} = 30.4$  Hz), 21.5.  $^{19}\text{F}$  NMR (376 MHz,  $\text{CDCl}_3$ )  $\delta$  -98.9. HRMS:  $m/z$ :  $[\text{M} + \text{H}]^+$  calculated for  $\text{C}_{19}\text{H}_{15}\text{BrFN}$ : 356.0445, found 356.0442.

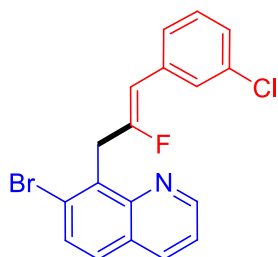

(Z)-7-bromo-8-(3-(3-chlorophenyl)-2-fluoroallyl)quinoline (**3oj**)

**3oj** was obtained according to the general procedure in 91% yield (68.7 mg), white solid,  $R_f = 0.30$  (hexanes/ethyl acetate = 25/1).  $^1\text{H}$  NMR (400 MHz,  $\text{CDCl}_3$ )  $\delta$  8.95 (dd,  $J = 4.1, 1.7$  Hz, 1H), 8.12 (dd,  $J = 8.2, 1.6$  Hz, 1H), 7.74 – 7.72 (m, 1H), 7.64 – 7.62 (m, 1H), 7.43 (dd,  $J = 8.2, 4.2$  Hz, 1H), 7.37 (s, 1H), 7.24 – 7.22 (m, 1H), 7.16 – 7.12 (m, 1H), 7.11 – 7.04 (m, 1H), 5.22 (d,  $J = 38.7$  Hz, 1H), 4.60 (d,  $J = 10.6$  Hz, 2H).  $^{13}\text{C}$  NMR (100 MHz,  $\text{CDCl}_3$ )  $\delta$  159.7 (d,  $J_{\text{C-F}} = 268.8$  Hz), 150.8, 147.5, 136.4, 135.7 (d,  $J_{\text{C-F}} = 2.5$  Hz), 134.4 (d,  $J_{\text{C-F}} = 6.5$  Hz), 134.2, 131.2, 129.5, 128.4, 128.3, 127.5, 126.9, 126.7 (d,  $J_{\text{C-F}} = 2.0$  Hz), 126.5 (d,  $J_{\text{C-F}} = 7.5$  Hz), 121.6, 105.8 (d,  $J_{\text{C-F}} = 7.5$  Hz), 34.4 (d,  $J_{\text{C-F}} = 30.1$  Hz).  $^{19}\text{F}$  NMR (376 MHz,  $\text{CDCl}_3$ )  $\delta$  -96.4. HRMS:  $m/z$ :  $[\text{M} + \text{H}]^+$  calculated for  $\text{C}_{18}\text{H}_{12}\text{BrClFN}$ : 375.9898, found 375.9896.

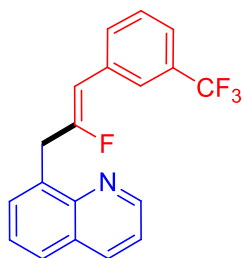

(Z)-8-(2-Fluoro-3-(3-(trifluoromethyl)phenyl)allyl)quinoline (**3ak**)

**3ak** was obtained according to the general procedure in 58% yield (38.5 mg), white solid,  $R_f = 0.40$  (hexanes/ethyl acetate = 25/1).  $^1\text{H}$  NMR (400 MHz,  $\text{CDCl}_3$ )  $\delta$  8.95 (dd,  $J = 4.2, 1.7$  Hz, 1H), 8.16 (dd,  $J = 8.3, 1.7$  Hz, 1H), 7.78 – 7.72 (m, 2H), 7.68 (s, 1H), 7.62 (d,  $J = 7.6$  Hz, 1H), 7.56 – 7.50 (m, 1H), 7.46 – 7.32 (m, 3H), 5.61 (d,  $J = 38.2$  Hz, 1H), 4.41 (d,  $J = 17.0$  Hz, 2H).  $^{13}\text{C}$  NMR (100 MHz,  $\text{CDCl}_3$ )  $\delta$  161.2 (d,  $J_{\text{C-F}} = 268.1$  Hz), 149.8, 146.6, 136.4, 134.61 (d,  $J_{\text{C-F}} = 4.5$  Hz), 134.6, 131.4 (dq,  $J_{\text{C-F}} = 7.8, 1.4$  Hz), 130.7 (q,  $J_{\text{C-F}} = 31.8$  Hz), 129.7, 128.7, 128.5, 127.4, 126.3, 125.0 (m), 124.2 (q,  $J_{\text{C-F}} = 270.6$  Hz), 123.2 (m), 121.3, 106.4 (d,  $J_{\text{C-F}} = 7.8$  Hz), 34.4 (d,  $J_{\text{C-F}} = 27.6$  Hz).  $^{19}\text{F}$  NMR (376 MHz,  $\text{CDCl}_3$ )  $\delta$  -62.7, -96.4. HRMS:  $m/z$ :  $[\text{M} + \text{H}]^+$  calculated for  $\text{C}_{19}\text{H}_{13}\text{F}_4\text{N}$ : 332.1057, found 332.1057.

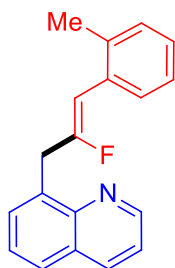

(Z)-8-(2-Fluoro-3-(o-tolyl)allyl)quinoline (**3al**)

**3al** was obtained according to the general procedure (60 °C) in 34% yield (15.5 mg), white solid,  $R_f = 0.40$  (hexanes/ethyl acetate = 25/1).  $^1\text{H}$  NMR (400 MHz,  $\text{CDCl}_3$ )  $\delta$  8.96 (dd,  $J = 4.1, 1.6$  Hz, 1H), 8.17 (dd,  $J = 8.3, 1.6$  Hz, 1H), 7.77 – 7.75 (m, 2H), 7.64 (d,  $J = 7.5$  Hz, 1H), 7.57 – 7.49 (m, 1H), 7.43 (dd,  $J = 8.3, 4.2$  Hz, 1H), 7.21 – 7.03 (m, 3H), 5.76 (d,  $J = 38.2$  Hz, 1H), 4.41 (d,  $J = 17.8$  Hz, 2H), 2.22 (s, 3H).  $^{13}\text{C}$  NMR (100 MHz,  $\text{CDCl}_3$ )  $\delta$  159.3 (d,  $J_{\text{C-F}} = 264.6$  Hz), 149.8, 146.8, 136.5, 135.6, 135.4, 132.5 (d,  $J_{\text{C-F}} = 1.8$  Hz), 130.0, 129.5, 129.3 (d,  $J_{\text{C-F}} = 9.5$  Hz), 128.6, 127.3, 127.0 (d,  $J_{\text{C-F}} = 0.9$  Hz), 126.5, 125.9, 121.3, 105.4 (d,  $J_{\text{C-F}} = 9.1$  Hz), 34.7 (d,  $J_{\text{C-F}} = 28.1$  Hz), 20.2.  $^{19}\text{F}$  NMR (376 MHz,  $\text{CDCl}_3$ )  $\delta$  -101.9. HRMS:  $m/z$ :  $[\text{M} + \text{H}]^+$  calculated for  $\text{C}_{19}\text{H}_{16}\text{FN}$ : 278.1340, found 278.1340.

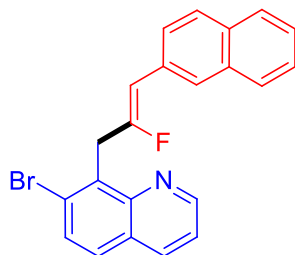

(Z)-7-Bromo-8-(2-fluoro-3-(naphthalen-2-yl)allyl)quinoline (**3om**)



**3om** was obtained according to the general procedure in 97% yield (76.2 mg), white solid,  $R_f = 0.30$  (hexanes/ethyl acetate = 25/1).  $^1\text{H}$  NMR (400 MHz,  $\text{CDCl}_3$ )  $\delta$  8.94 (dd,  $J = 4.2, 1.7$  Hz, 1H), 8.06 (dd,  $J = 8.3, 1.6$  Hz, 1H), 7.76 (s, 1H), 7.73 – 7.64 (m, 4H), 7.61 – 7.54 (m, 2H), 7.41 – 7.32 (m, 3H), 5.44 (d,  $J = 39.5$  Hz, 1H), 4.64 (d,  $J = 10.8$  Hz, 2H).  $^{13}\text{C}$  NMR (100 MHz,  $\text{CDCl}_3$ )  $\delta$  158.9 (d,  $J_{\text{C-F}} = 267.3$  Hz), 150.8, 147.5, 136.3, 134.7 (d,  $J_{\text{C-F}} = 6.4$  Hz), 133.5, 132.3 (d,  $J_{\text{C-F}} = 1.6$  Hz), 131.6 (d,  $J_{\text{C-F}} = 2.8$  Hz), 131.2, 128.3, 128.0, 127.8, 127.6, 127.5, 127.2 (d,  $J_{\text{C-F}} = 7.3$  Hz), 126.9, 126.7 (d,  $J_{\text{C-F}} = 7.7$  Hz), 126.0, 125.7, 121.5, 107.0 (d,  $J_{\text{C-F}} = 7.6$  Hz), 34.5 (d,  $J_{\text{C-F}} = 30.3$  Hz).  $^{19}\text{F}$  NMR (376 MHz,  $\text{CDCl}_3$ )  $\delta$  -98.1. HRMS:  $m/z$ :  $[\text{M} + \text{H}]^+$  calculated for  $\text{C}_{22}\text{H}_{15}\text{BrFN}$ : 392.0445, found 392.0441.

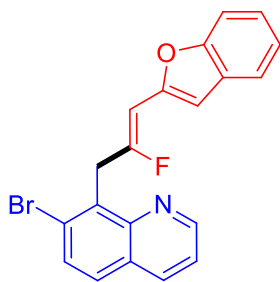

(Z)-8-(3-(benzofuran-2-yl)-2-fluoroallyl)-7-bromoquinoline (**3on**)

**3on** was obtained according to the general procedure in 35% yield (26.8 mg), white solid,  $R_f = 0.30$  (hexanes/ethyl acetate = 25/1).  $^1\text{H}$  NMR (400 MHz,  $\text{CDCl}_3$ )  $\delta$  8.96 (dd,  $J = 4.2, 1.7$  Hz, 1H), 8.15 (dd,  $J = 8.3, 1.7$  Hz, 1H), 7.76 – 7.74 (m, 1H), 7.68 – 7.66 (m, 1H), 7.51 – 7.42 (m, 2H), 7.32 – 7.31 (m, 1H), 7.16 – 7.13 (m, 2H), 6.82 (s, 1H), 5.43 (d,  $J = 37.5$  Hz, 1H), 4.66 (d,  $J = 9.3$  Hz, 2H).  $^{13}\text{C}$  NMR (100 MHz,  $\text{CDCl}_3$ )  $\delta$  160.7 (d,  $J_{\text{C-F}} = 271.5$  Hz), 153.8 (d,  $J_{\text{C-F}} = 1.0$  Hz), 151.0 (d,  $J_{\text{C-F}} = 2.3$  Hz), 150.9, 147.5, 136.4, 134.0 (d,  $J_{\text{C-F}} = 7.3$  Hz), 131.2, 129.4, 128.5, 127.5, 127.0, 124.0, 122.8, 121.7, 120.8, 110.8, 105.1 (d,  $J_{\text{C-F}} = 11.3$  Hz), 98.0 (d,  $J_{\text{C-F}} = 10.1$  Hz), 34.2 (d,  $J_{\text{C-F}} = 28.9$  Hz).  $^{19}\text{F}$  NMR (376 MHz,  $\text{CDCl}_3$ )  $\delta$  -89.5. HRMS:  $m/z$ :  $[\text{M} + \text{H}]^+$  calculated for  $\text{C}_{20}\text{H}_{13}\text{BrFNO}$ : 382.0237, found 382.0240.

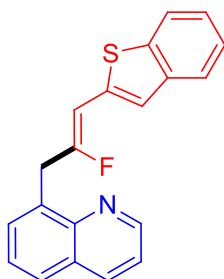

(Z)-8-(3-(Benzo[b]thiophen-2-yl)-2-fluoroallyl)quinoline (**3ao**)

**3al** was obtained according to the general procedure (60 °C) in 32% yield (20.1 mg), white solid,  $R_f = 0.40$  (hexanes/ethyl acetate = 25/1).  $^1\text{H}$  NMR (400 MHz,  $\text{CDCl}_3$ )  $\delta$  8.95 (dd,  $J = 4.2, 1.7$  Hz, 1H), 8.16 (dd,  $J = 8.3, 1.7$  Hz, 1H), 7.78 – 7.73 (m, 3H), 7.69 – 7.62 (m, 1H), 7.57 – 7.50 (m, 1H), 7.42 (dd,  $J = 8.3, 4.2$  Hz, 1H), 7.31 – 7.22 (m, 2H), 7.15 (s, 1H), 5.95 (d,  $J = 37.7$  Hz, 1H), 4.44 (d,  $J = 16.6$  Hz, 2H).  $^{13}\text{C}$  NMR (100 MHz,  $\text{CDCl}_3$ )  $\delta$  160.4 (d,  $J_{\text{C-F}} = 267.9$  Hz), 149.9, 146.7, 140.1 (d,  $J_{\text{C-F}} = 7.5$  Hz), 139.5, 136.5, 134.6 (d,  $J_{\text{C-F}} = 1.5$  Hz), 132.7 (d,  $J_{\text{C-F}} = 2.8$  Hz), 129.9, 128.6, 127.5, 126.5, 124.3, 124.2, 123.2

(d,  $J_{\text{C-F}} = 1.5$  Hz), 122.4 (d,  $J_{\text{C-F}} = 4.2$  Hz), 122.1, 121.4, 102.8 (d,  $J_{\text{C-F}} = 11.4$  Hz), 34.0 (d,  $J_{\text{C-F}} = 26.7$  Hz).  $^{19}\text{F}$  NMR (376 MHz,  $\text{CDCl}_3$ )  $\delta$  -93.7. HRMS:  $m/z$ :  $[\text{M} + \text{H}]^+$  calculated for  $\text{C}_{20}\text{H}_{14}\text{FNS}$ : 320.0904, found 320.0903.

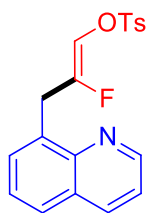

**(Z)-2-Fluoro-3-(quinolin-8-yl)prop-1-en-1-yl 4-methylbenzenesulfonate (3aq)**

**3ap** was obtained according to the general procedure (100 °C, DCE) in 61% yield (43.8 mg), white solid,  $R_f = 0.30$  (hexanes/ethyl acetate = 8/1).  $^1\text{H}$  NMR (400 MHz,  $\text{CDCl}_3$ )  $\delta$  8.90 (dd,  $J = 4.2, 1.8$  Hz, 1H), 8.16 (dd,  $J = 8.3, 1.8$  Hz, 1H), 7.75 – 7.73 (m, 1H), 7.70 – 7.67 (m, 2H), 7.48 – 7.38 (m, 3H), 7.18 – 7.16 (m, 2H), 6.18 (d,  $J = 19.1$  Hz, 1H), 4.09 (d,  $J = 19.3$  Hz, 2H), 2.38 (s, 3H).  $^{13}\text{C}$  NMR (100 MHz,  $\text{CDCl}_3$ )  $\delta$  153.4 (d,  $J_{\text{C-F}} = 262.2$  Hz), 149.8, 146.4, 145.3, 136.5, 133.3, 131.9, 129.7, 129.4, 128.5, 128.4, 127.6, 126.3, 121.4, 119.0 (d,  $J_{\text{C-F}} = 11.6$  Hz), 30.1 (d,  $J_{\text{C-F}} = 23.2$  Hz), 21.8.  $^{19}\text{F}$  NMR (376 MHz,  $\text{CDCl}_3$ )  $\delta$  -117.8. HRMS:  $m/z$ :  $[\text{M} + \text{H}]^+$  calculated for  $\text{C}_{19}\text{H}_{16}\text{FNO}_3\text{S}$ : 358.0908, found 358.0907.

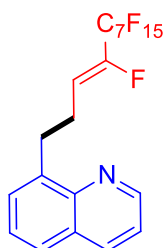

**3aq** was obtained according to the general procedure (80 °C) in 94% yield (108.7 mg), white solid,  $R_f = 0.30$  (hexanes/ethyl acetate = 50/1).  $^1\text{H}$  NMR (400 MHz,  $\text{CDCl}_3$ )  $\delta$  8.83 (dd,  $J = 4.2, 1.8$  Hz, 1H), 8.04 (dd,  $J = 8.3, 1.7$  Hz, 1H), 7.60 (dd,  $J = 8.1, 1.3$  Hz, 1H), 7.44 – 7.43 (m, 1H), 7.40 – 7.34 (m, 1H), 7.31 – 7.28 (m, 1H), 5.62 (dt,  $J = 34.0, 7.8$  Hz, 1H), 3.33 (t,  $J = 7.5$  Hz, 2H), 2.76 – 2.63 (m, 2H).  $^{13}\text{C}$  NMR (100 MHz,  $\text{CDCl}_3$ )  $\delta$  149.4, 146.9 (t,  $J = 28.6$  Hz), 146.7, 144.3 (t,  $J = 22.5$  Hz), 138.9, 136.4, 129.1, 128.5, 126.7, 126.2, 121.0, 118.6 (m), 116.0 (m), 112.8 (m), 110.6 (m), 108.2 (m), 30.3, 24.5 (d,  $J_{\text{C-F}} = 2.4$  Hz).  $^{19}\text{F}$  NMR (376 MHz,  $\text{CDCl}_3$ )  $\delta$  -80.9 (m), -117.4 (m), -122.1 (m), -122.8 (m), -123.2 (m), -126.2 (m), -132.2 (m). HRMS:  $m/z$ :  $[\text{M} + \text{H}]^+$  calculated for  $\text{C}_{29}\text{H}_{11}\text{F}_{16}\text{N}$ : 570.0709, found 570.0705.

### III. Derivatization of coupled product 3aa and 3oa

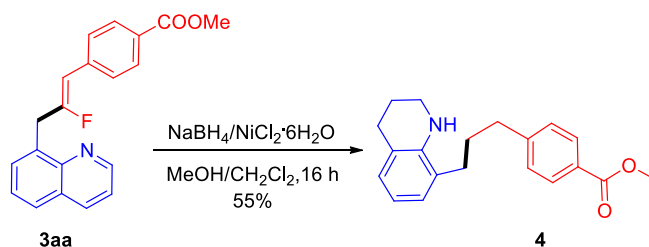

Olefin **3aa** (0.2 mmol, 64.2 mg) and  $\text{NiCl}_2 \cdot 6\text{H}_2\text{O}$  (10 mol%, 5.0 mg, 0.02 mmol) were dissolved in MeOH (2 mL), to which was added  $\text{CH}_2\text{Cl}_2$  (1 mL) and  $\text{NaBH}_4$  (3 mmol, 114 mg) in portions with stirring under cooling for 1 h. Then the stirring was continued for another 16 h at rt. After the removal of the solvents, the residue was absorbed onto small amounts of silica. The purification was performed by flash column chromatography on silica gel (eluent: EtOAc/petroleum ether = 1:8) to afford compound **4** as a white solid (55%).  $^1\text{H}$  NMR (400 MHz,  $\text{CDCl}_3$ )  $\delta$  7.96 (d,  $J$  = 8.1 Hz, 2H), 7.28 (d,  $J$  = 8.1 Hz, 2H), 6.89 – 6.80 (m, 2H), 6.59 – 6.57 (m,  $J$  = 7.4 Hz, 1H), 3.90 (s, 3H), 3.34 – 3.26 (m, 2H), 2.79 – 2.73 (m, 4H), 2.45 – 2.37 (m, 2H), 1.98 – 1.88 (m, 4H). The NH was not visible due to exchange.  $^{13}\text{C}$  NMR (100 MHz,  $\text{CDCl}_3$ )  $\delta$  167.3, 147.9, 142.3, 129.8, 128.6, 128.0, 127.7, 126.8, 124.9, 121.5, 116.6, 52.1, 42.4, 35.9, 30.3, 29.6, 27.6, 22.2. HRMS:  $m/z$ :  $[\text{M} + \text{H}]^+$  calculated for  $\text{C}_{20}\text{H}_{23}\text{NO}_2$ : 310.1802, found 310.1806.

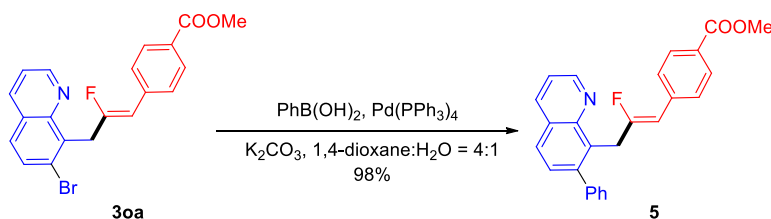

Olefin **3oa** (0.1 mmol, 40.0 mg),  $\text{PhB(OH)}_2$  (0.15 mmol, 18.3 mg),  $\text{Pd(PPh}_3)_4$  (5 mol%, 6.0 mg),  $\text{K}_2\text{CO}_3$  (0.2 mmol, 34.0 mg), 1,4-dioxane (0.8 mL), and  $\text{H}_2\text{O}$  (0.2 mL) were charged into a pressure tube. The reaction mixture was stirred under  $\text{N}_2$  at 90 °C for 12 h. After the removal of the solvents, the residue was absorbed onto small amounts of silica. The purification was performed by flash column chromatography on silica gel (eluent: EtOAc/petroleum ether = 1:25) to afford compound **5** as a white solid (39.0 mg, 98%).  $^1\text{H}$  NMR (400 MHz,  $\text{CDCl}_3$ )  $\delta$  8.99 (dd,  $J$  = 4.2, 1.8 Hz, 1H), 8.19 (dd,  $J$  = 8.2, 1.7 Hz, 1H), 7.89 – 7.87 (m, 2H), 7.83 (d,  $J$  = 8.4 Hz, 1H), 7.52 (d,  $J$  = 8.4 Hz, 1H), 7.48 – 7.38 (m, 6H), 7.36 – 7.34 (m, 2H), 5.09 (d,  $J$  = 39.1 Hz, 1H), 4.37 (d,  $J$  = 10.0 Hz, 2H), 3.86 (s, 3H).  $^{13}\text{C}$  NMR (100 MHz,  $\text{CDCl}_3$ )  $\delta$  167.1, 162.7 (d,  $J_{\text{C-F}}$  = 270.6 Hz), 150.4, 147.0, 143.9, 141.2, 138.9 (d,  $J_{\text{C-F}}$  = 2.6 Hz), 136.3, 131.3 (d,  $J_{\text{C-F}}$  = 7.0 Hz), 129.6, 129.2, 129.15, 128.5, 128.2 (d,  $J_{\text{C-F}}$  = 7.7 Hz), 127.8 (d,  $J_{\text{C-F}}$  = 2.3 Hz), 127.7, 127.6, 127.1, 121.3, 106.3 (d,  $J_{\text{C-F}}$  = 7.7 Hz), 52.1, 32.0 (d,  $J_{\text{C-F}}$  = 29.4 Hz).  $^{19}\text{F}$  NMR (376 MHz,  $\text{CDCl}_3$ )  $\delta$  -93.1. HRMS:  $m/z$ :  $[\text{M} + \text{H}]^+$  calculated for  $\text{C}_{26}\text{H}_{20}\text{FNO}_2$ : 398.1551, found 398.1555.

#### IV. Mechanistic Studies

##### (a) H/D Exchange Experiments

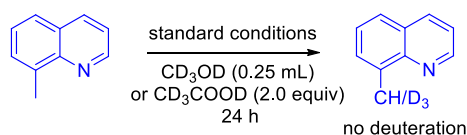

8-Methylquinoline (0.2 mmol), [Cp\*RhCl<sub>2</sub>]<sub>2</sub> (5 mol%), AgNTf<sub>2</sub> (20 mol%), Ca(OH)<sub>2</sub> (3.0 equiv), Zn(OAc)<sub>2</sub> (50 mol%), and 4 Å M.S. (100 mg) were added to TFE (2 mL) in a pressure tube, and CD<sub>3</sub>OD (0.25 mL) or CD<sub>3</sub>COOD (2.0 equiv) was then introduced under N<sub>2</sub> atmosphere. The reaction mixture was stirred at 45 °C for 24 h. After that, the solvent was removed under reduced pressure and the residue was purified by silica gel chromatography using PE/EA to afford an oil, which was characterized by <sup>1</sup>H NMR spectroscopy. The methyl group was not be deuterated.

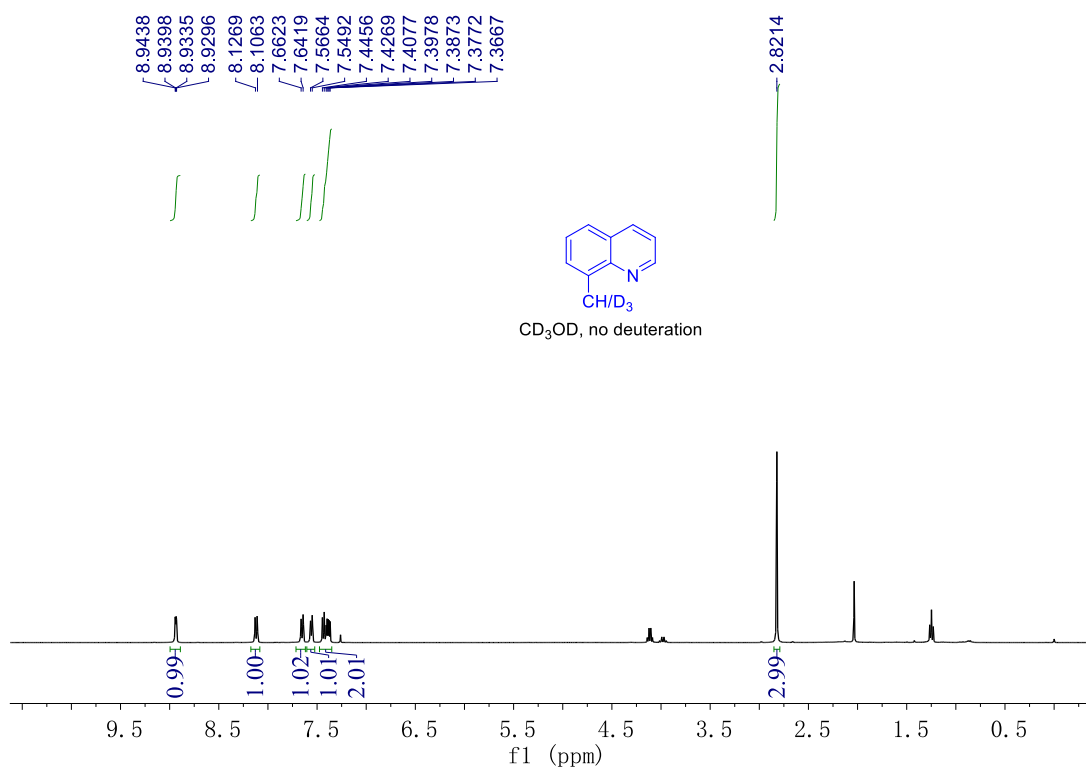

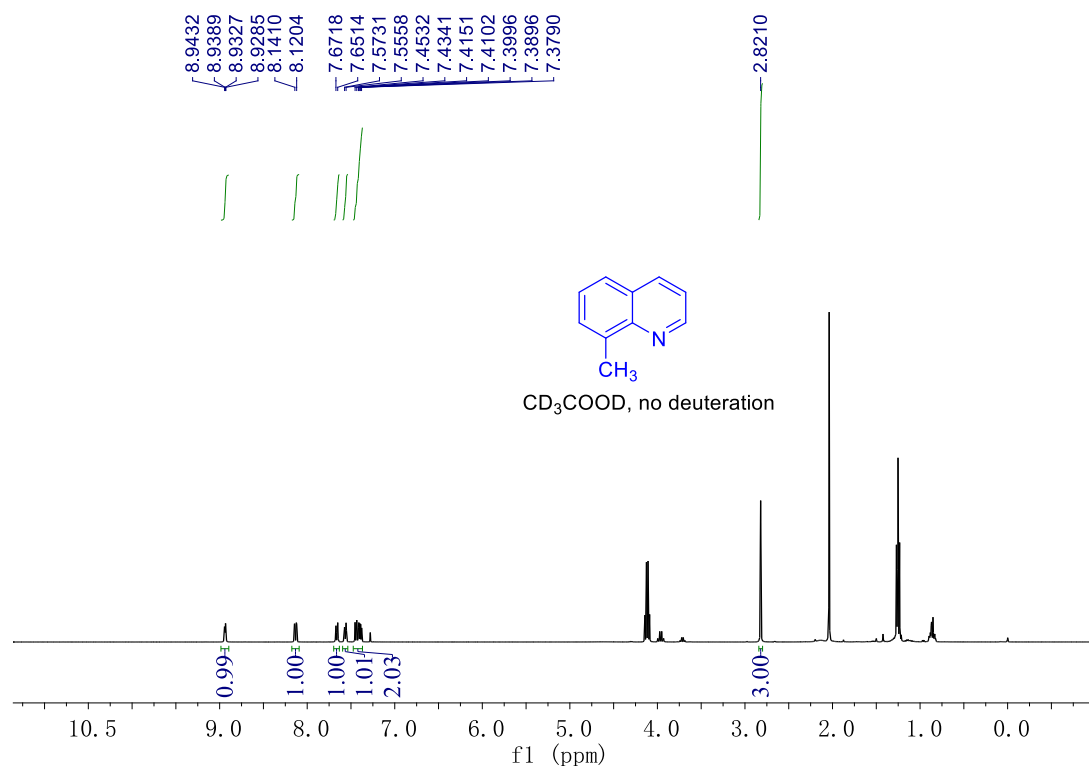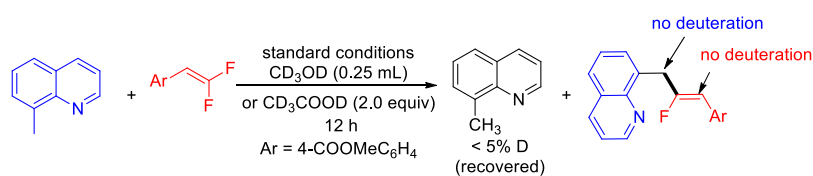

8-Methylquinoline (0.2 mmol), *gem*-difluoroalkene **2a** (0.3 mmol), [Cp\**Rh*Cl<sub>2</sub>]<sub>2</sub> (5 mol%), AgNTf<sub>2</sub> (20 mol%), Ca(OH)<sub>2</sub> (3.0 equiv), Zn(OAc)<sub>2</sub> (50 mol%), and 4 Å M.S. (100 mg) were dissolved in TFE (2 mL), and CD<sub>3</sub>OD (0.25 mL) or CD<sub>3</sub>COOD (2.0 equiv) in a pressure tube under N<sub>2</sub> atmosphere. The reaction mixture was stirred at 45 °C for 12 h. After that, the solvent was removed under reduced pressure and the residue was purified by silica gel chromatography using PE/EA to afford the recovered 8-methyl-quinoline and the product **3aa**, which were characterized by <sup>1</sup>H NMR spectroscopy.

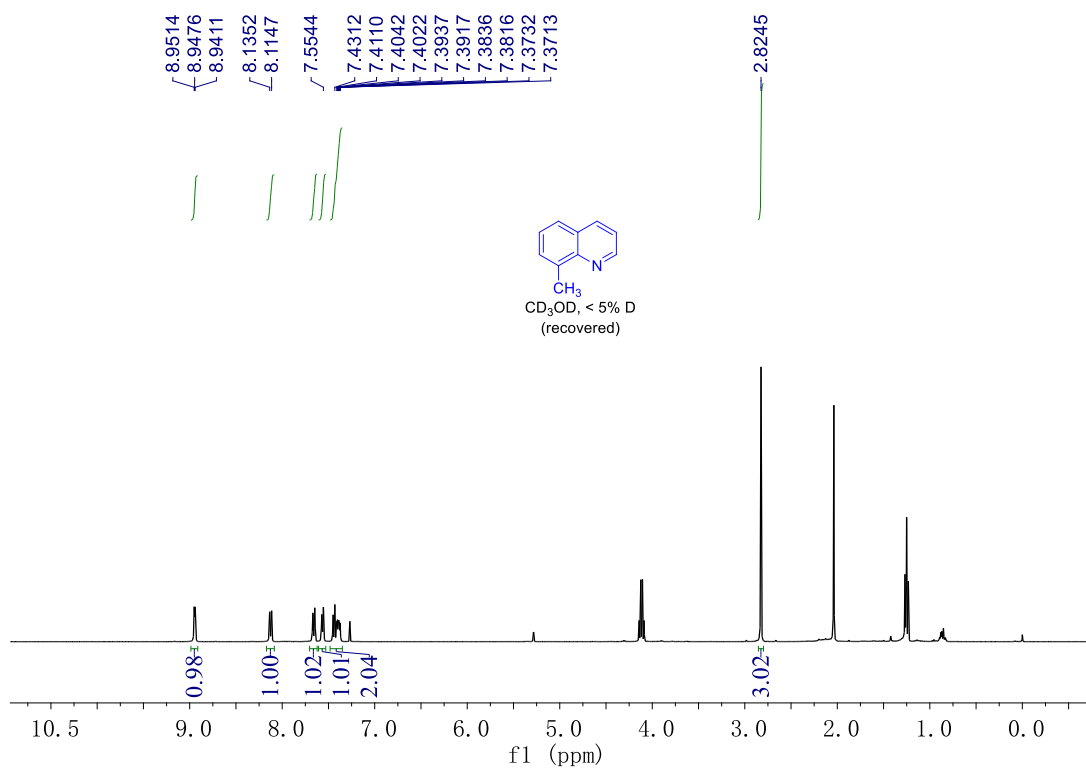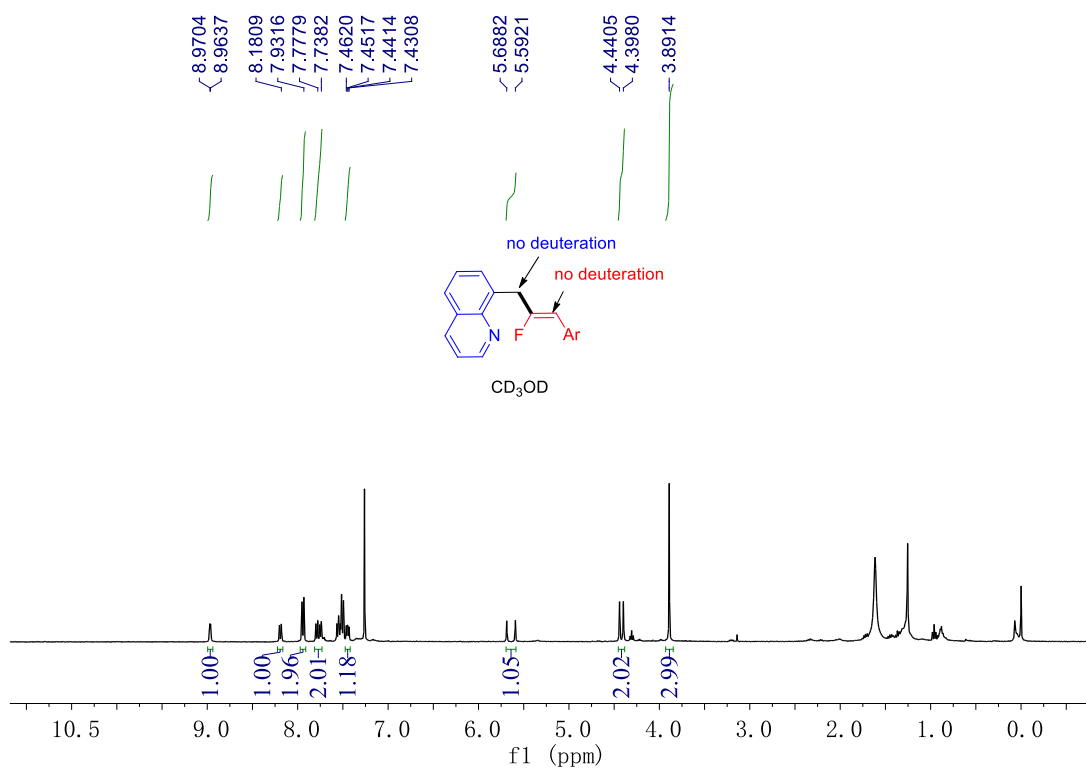

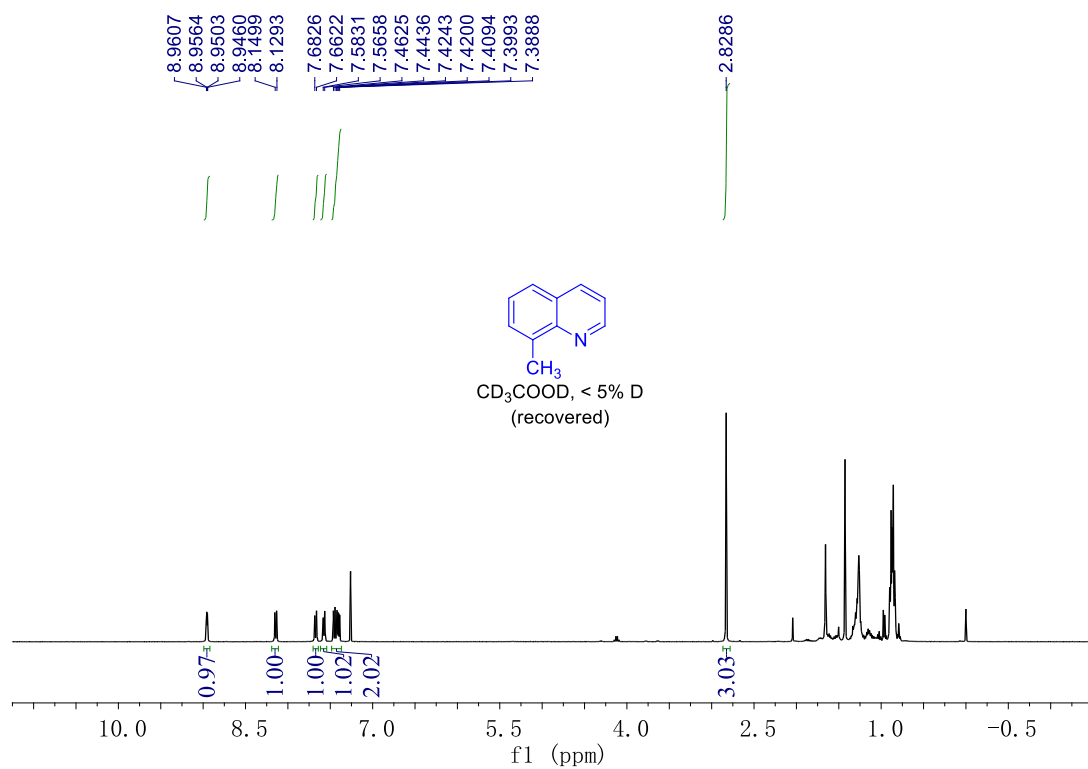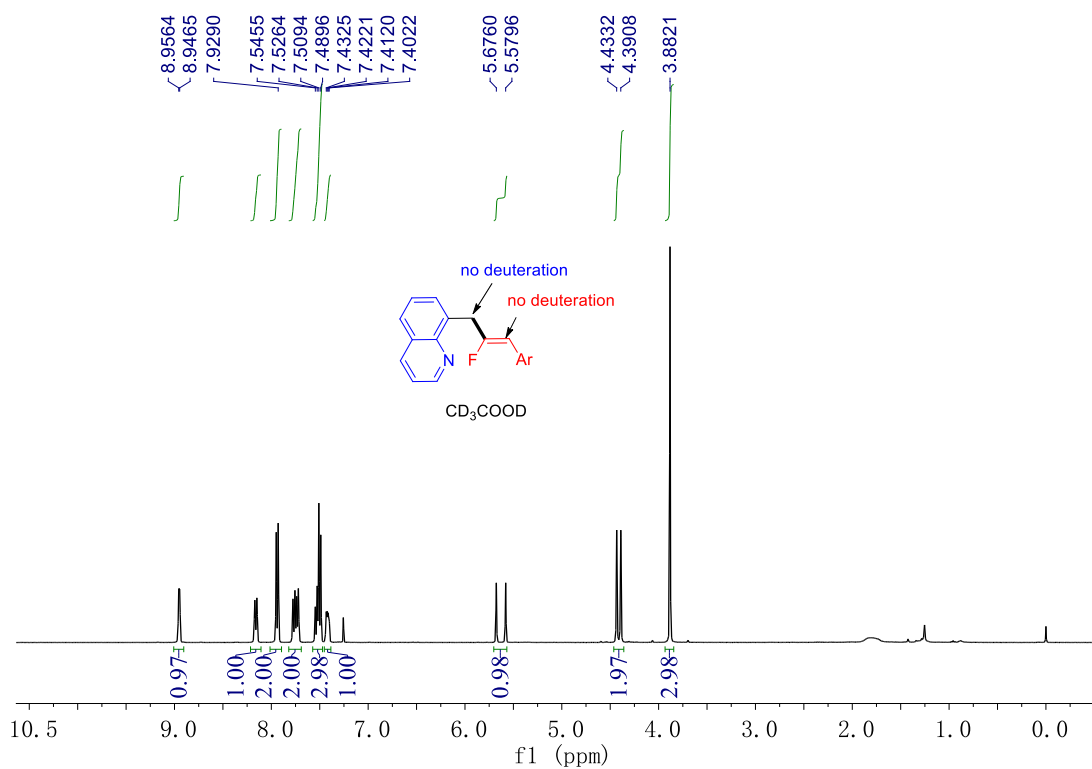

**(b) Competition Reaction**

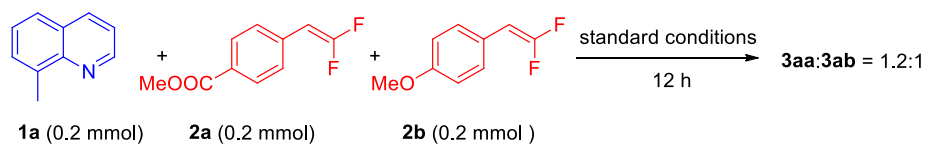

8-Methylquinoline **1a** (0.2 mmol), *gem*-difluoroalkene **2a** (0.2 mmol), **2b** (0.2 mmol), [Cp\*RhCl<sub>2</sub>]<sub>2</sub> (5 mol%), AgNTf<sub>2</sub> (20 mol%), Ca(OH)<sub>2</sub> (3.0 equiv), Zn(OAc)<sub>2</sub> (50 mol%), and 4 Å M.S. (100 mg) were dissolved in TFE (2 mL) in a pressure tube under N<sub>2</sub> atmosphere. The reaction mixture was stirred at 45 °C for 12 h. After that, the solvent was removed under reduced pressure and the residue was purified by silica gel chromatography using PE/EA to afford **3aa** and **3ab**, which were characterized by <sup>1</sup>H NMR spectroscopy.

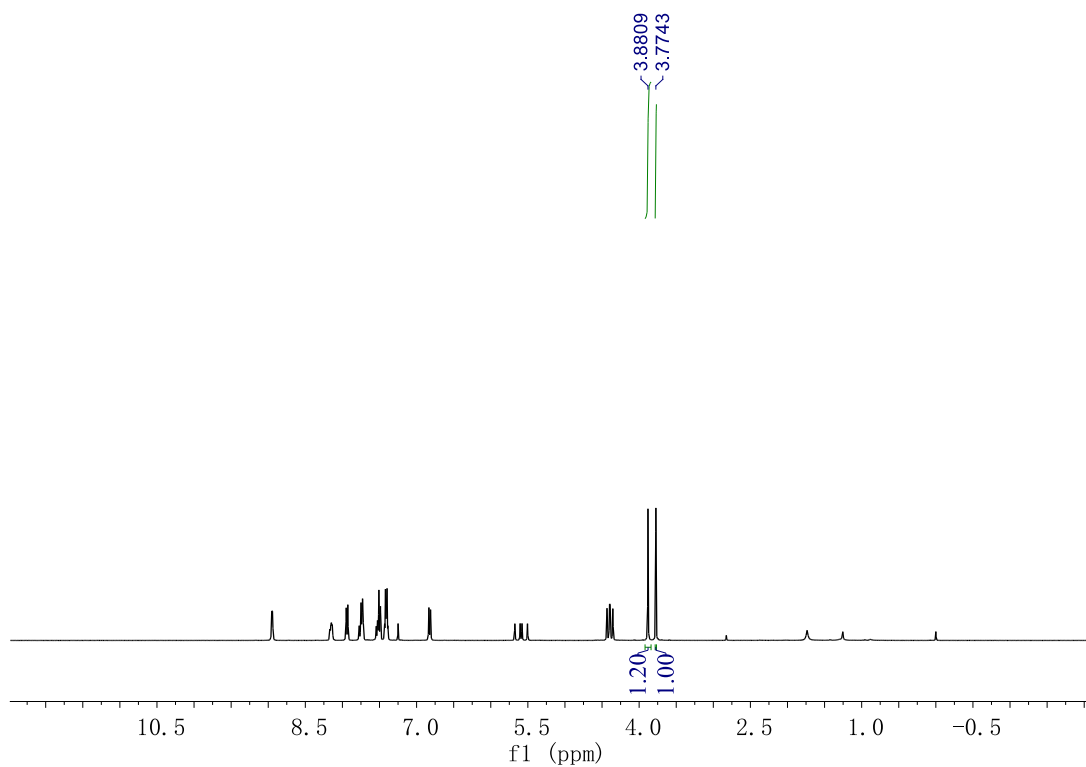



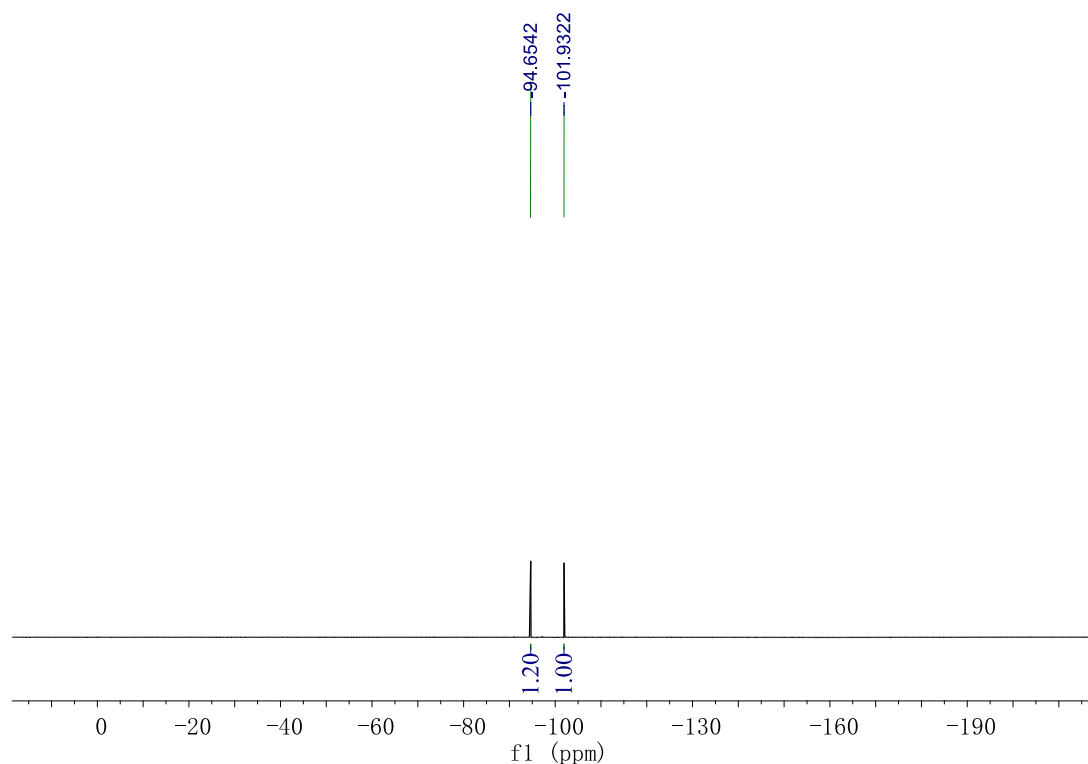

### (c) KIE Study

Two pressure tubes were separately charged with **1a** or **1a-*d*<sub>3</sub>** (0.1 mmol), and to each tube was added *gem*-difluoroalkene **2a** (0.15 mmol) [ $\text{Cp}^*\text{RhCl}_2$ ]<sub>2</sub> (5 mol%),  $\text{AgNTf}_2$  (20 mol%),  $\text{Ca}(\text{OH})_2$  (3.0 equiv),  $\text{Zn}(\text{OAc})_2$  (50 mol%), and 4 Å M.S. (50 mg) were dissolved in TFE (1 mL) in a pressure tube under  $\text{N}_2$  atmosphere. The two reaction mixtures were stirred side by side in an oil bath preheated at 45 °C for 5 min. The resulting mixtures in the two tubes were rapidly combined and the solvent was rapidly removed under reduced pressure. The resulting residue was purified by silica gel chromatography using EA/PE to afford the crude products. The KIE value was determined to be  $k_{\text{H}}/k_{\text{D}} = 5.9$  on the basis of  $^1\text{H}$  NMR analysis.

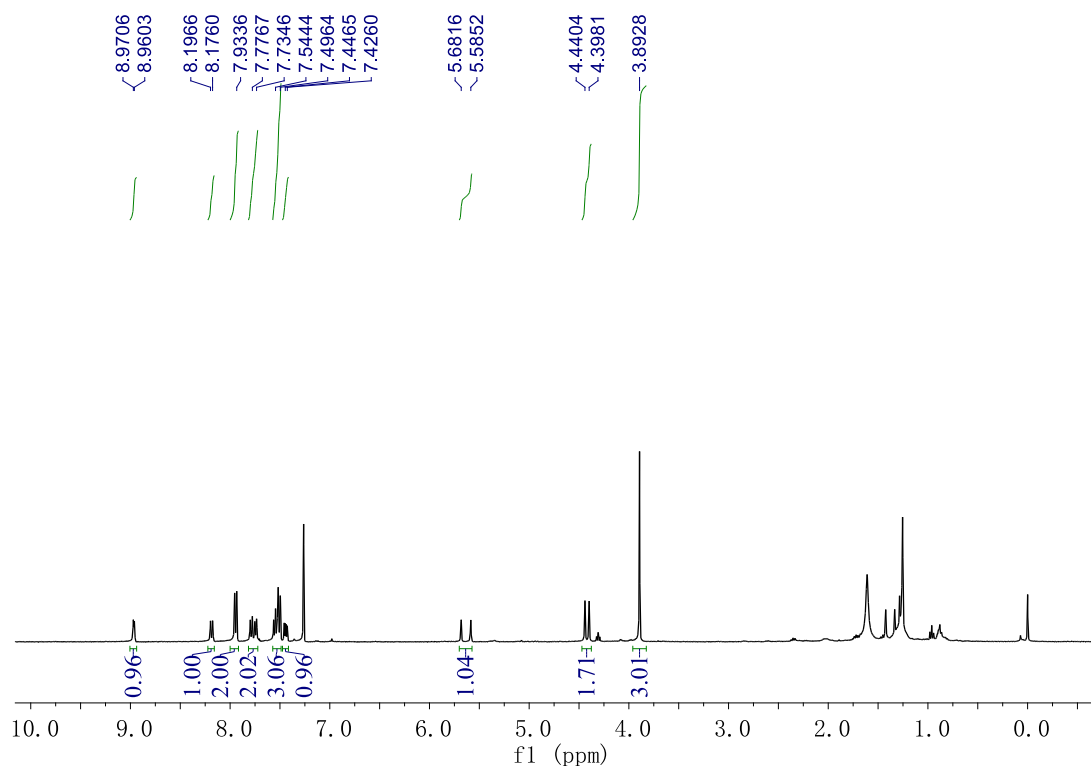

#### (d) Synthetic method of 2 mmol scale

7-Bromo-8-methylquinoline **1q** (2.0 mmol), *gem*-difluoroalkene **2a** (3.0 mmol), [Cp\*RhCl<sub>2</sub>]<sub>2</sub> (3 mol%), AgNTf<sub>2</sub> (12 mol%), Ca(OH)<sub>2</sub> (3.0 equiv), Zn(OAc)<sub>2</sub> (50 mol%), and 4 Å M.S. (1.0 g), and TFE (20 mL) were charged into a pressure tube. The reaction mixture was stirred under N<sub>2</sub> at 45 °C for 24 h. After the solvent was removed under reduced pressure, the residue was purified by silica gel chromatography using PE/EA (40:1) to afford the product **3qa** in 60% (480.6 mg).

#### V. References

- (1) (a) P. Evans, P. Hogg, R. Grigg, M. Nurnabi, J. Hinsley, V. Sridharan, S. Suganthan, S. Korn, S. Collard and J. E. Muir, *Tetrahedron*, 2005, **61**, 9696; (b) N. Gandhamsetty, S. Joung, S.-W. Park, S. Park and S. Chang, *J. Am. Chem. Soc.*, 2014, **48**, 16780. (c) T. M. Heidelbaugh, P. X. Nguyen, K. Chow and M. E. Garst, WO2008/88937 A1, 2008.
- (2) C. S. Thomason, H. Martinez and W. R. D. Jr, *J. Fluorine Chem.*, 2013, **150**, 53.

## VI. NMR Spectra of Coupled Products

### 3aa

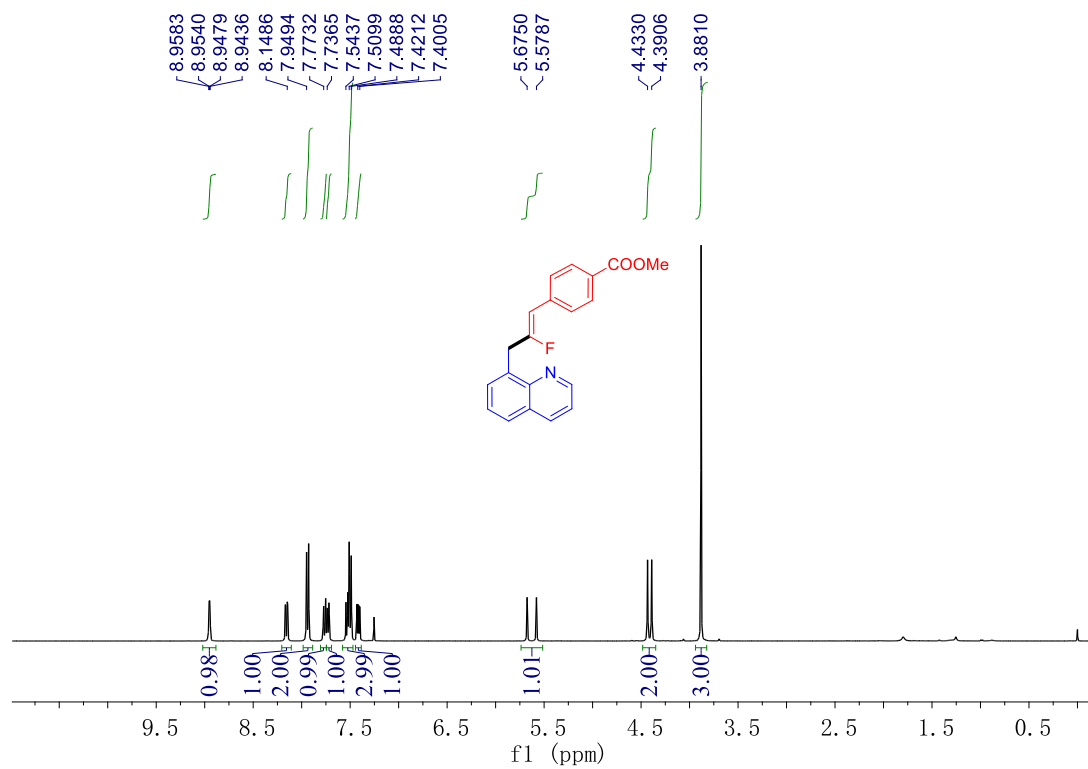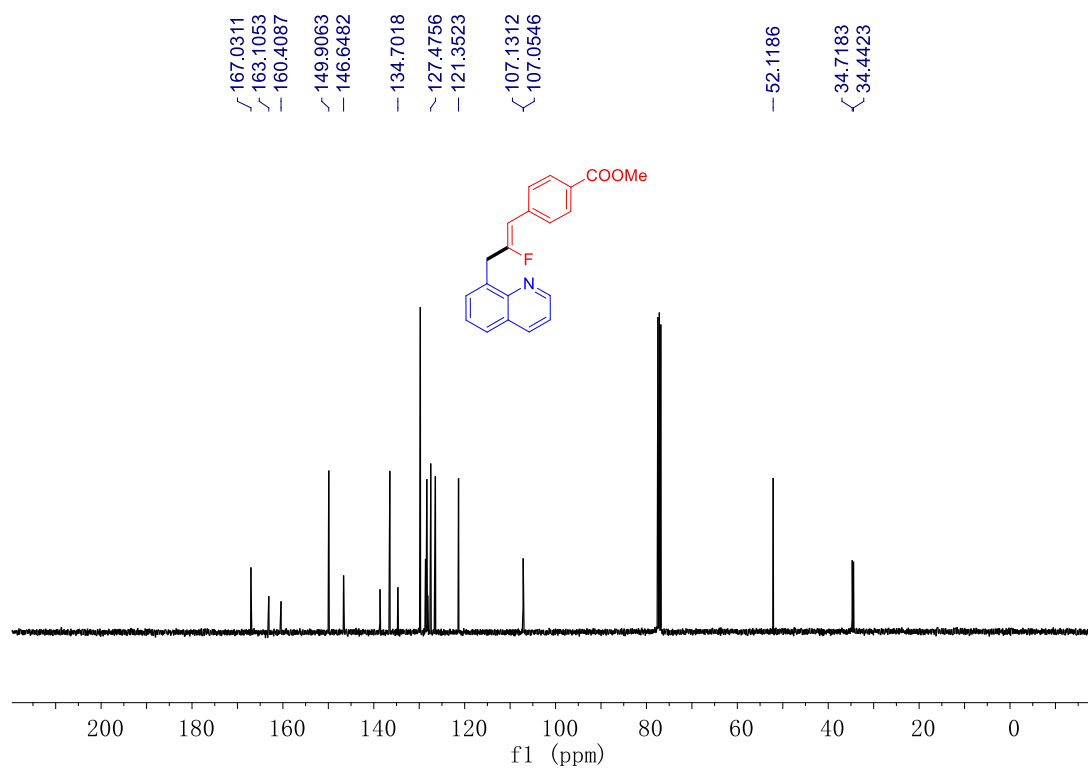

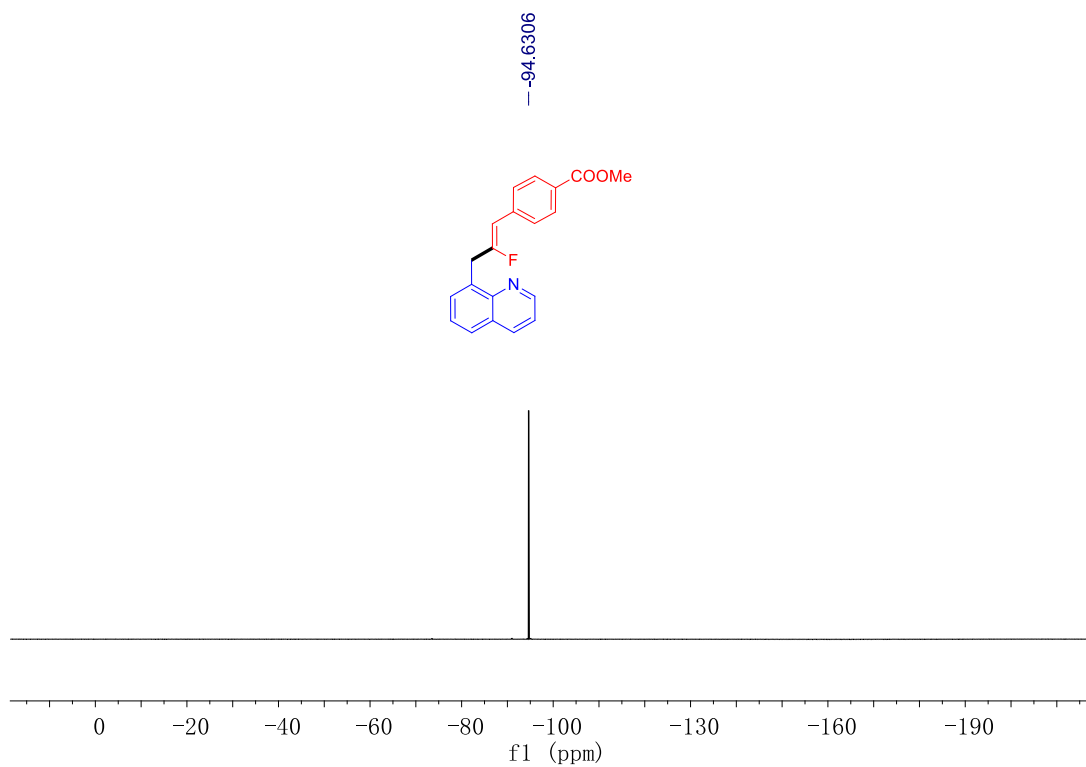

**3ba**

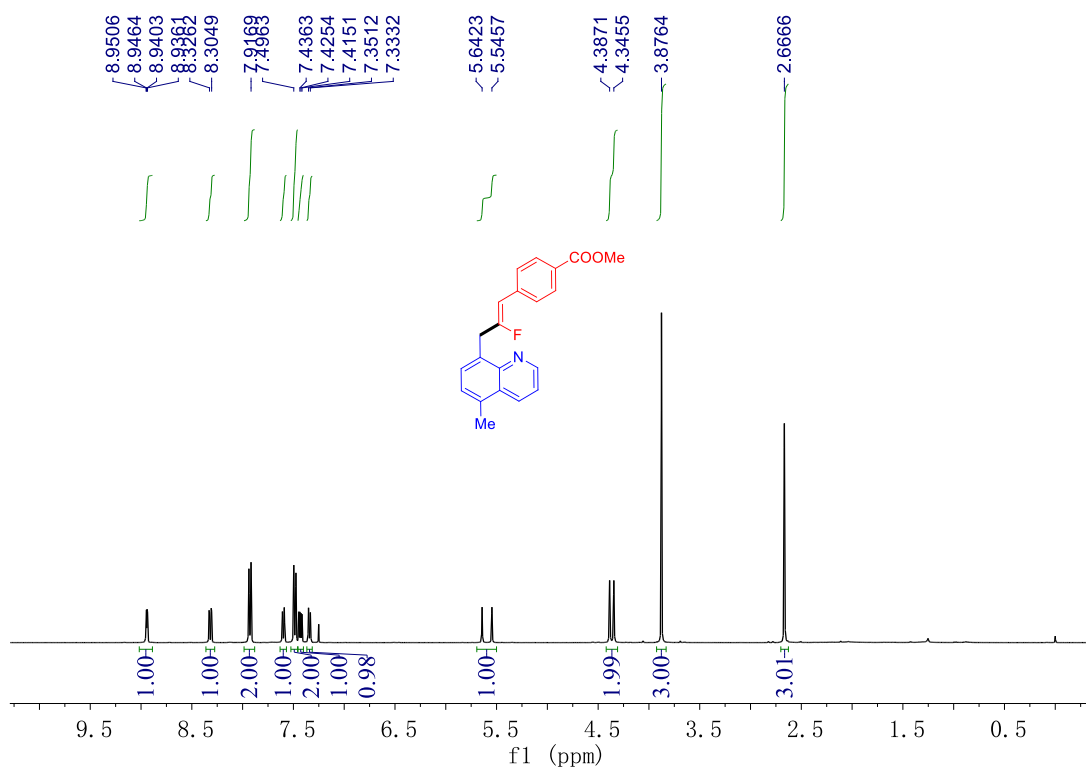

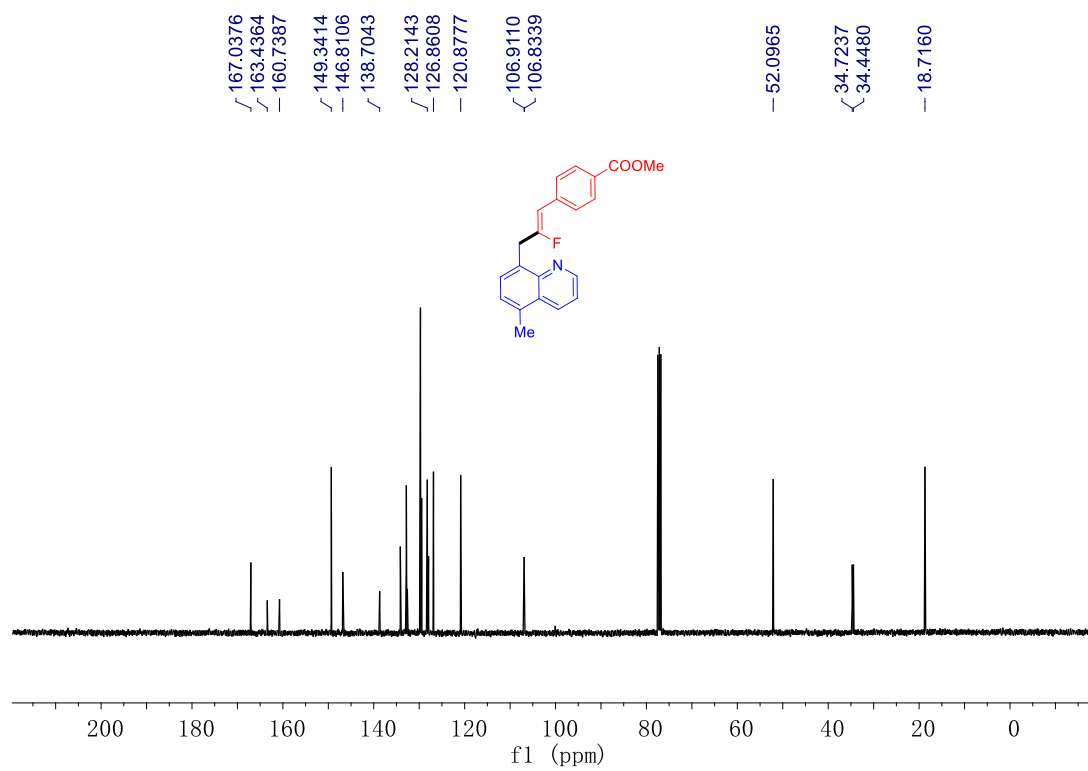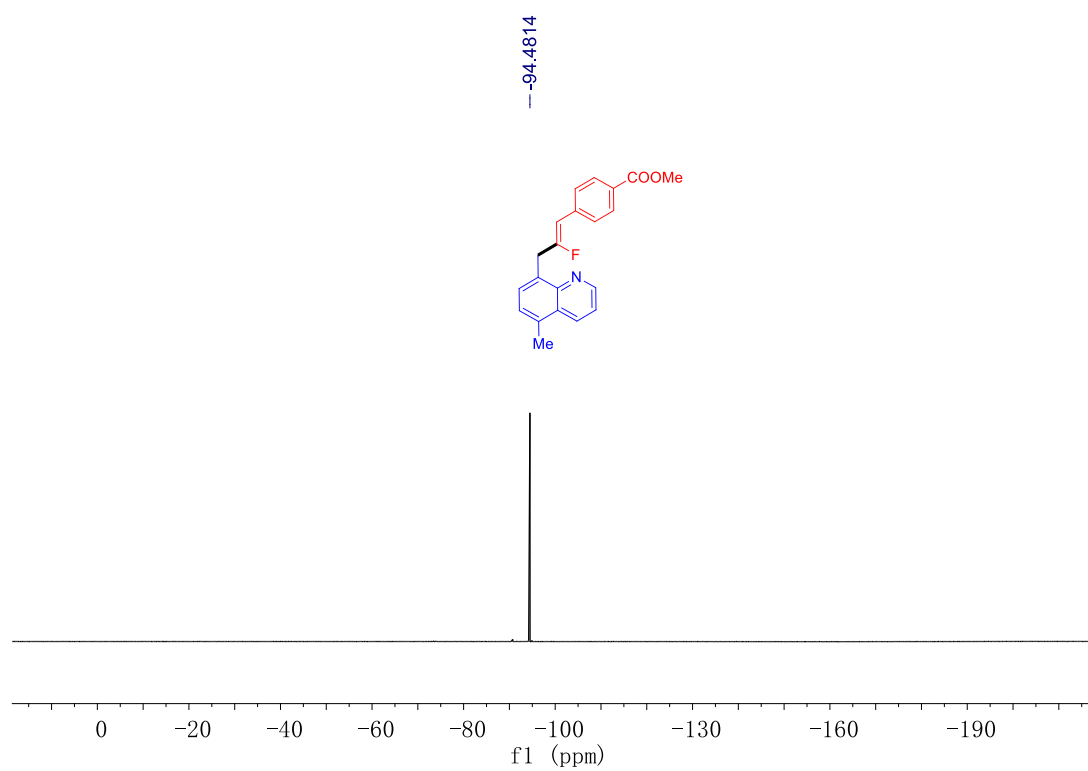

3ca

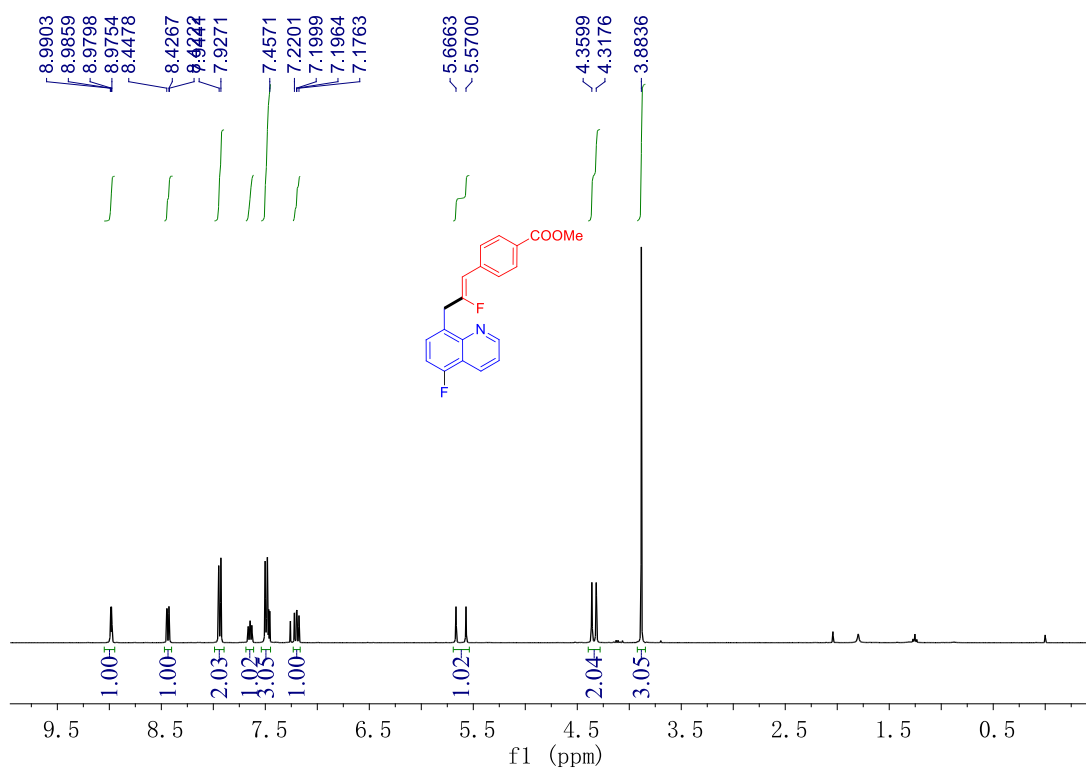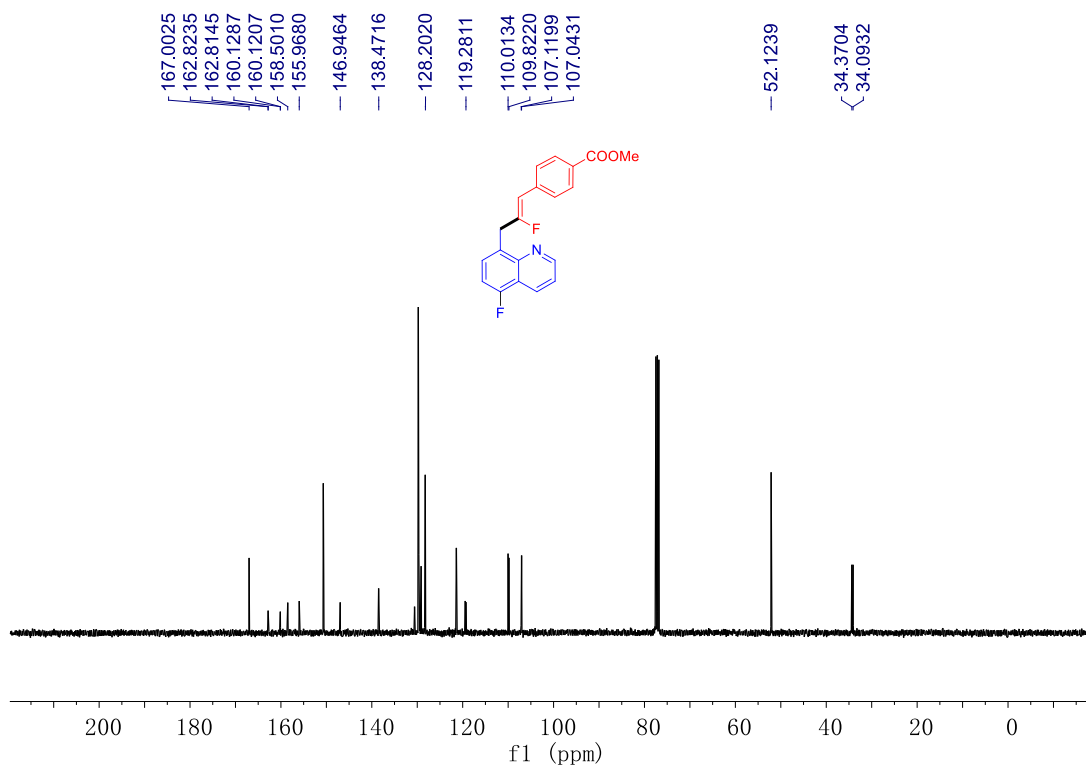

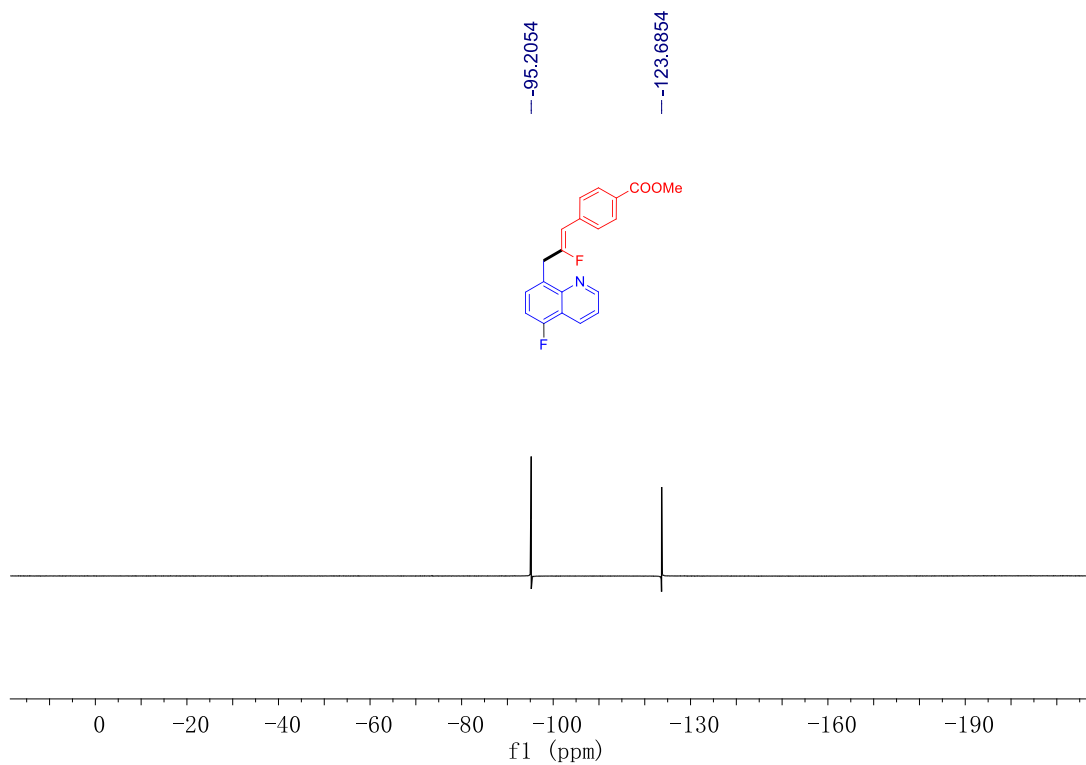

### 3da

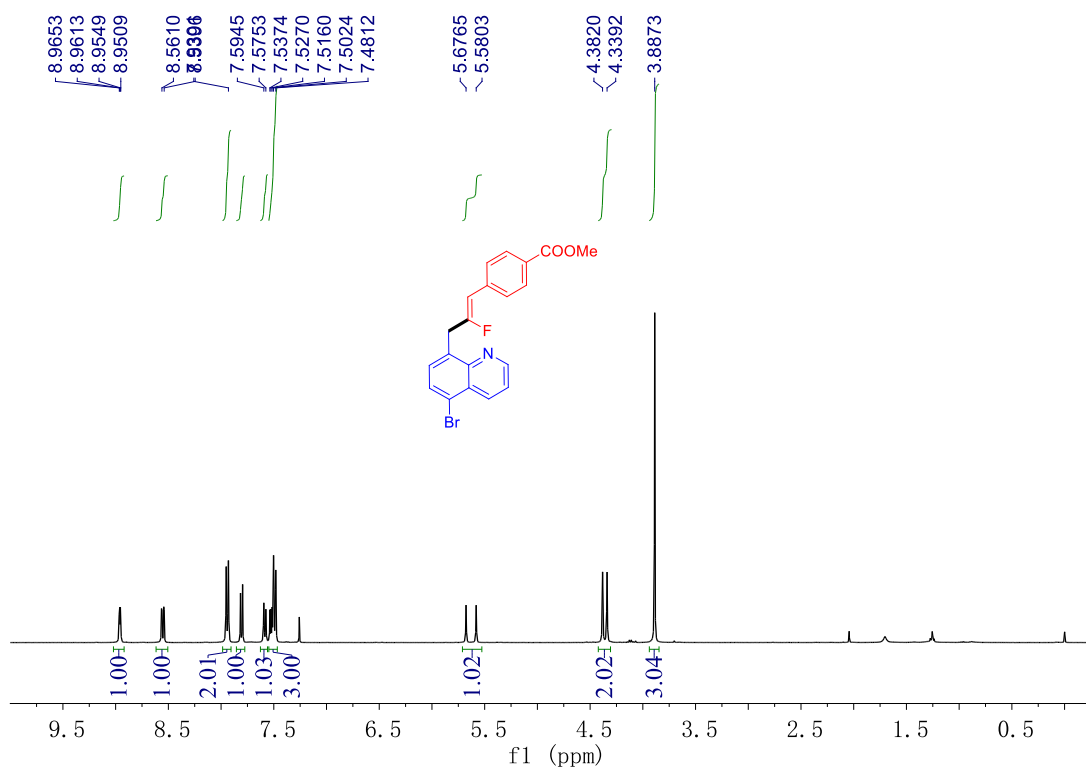

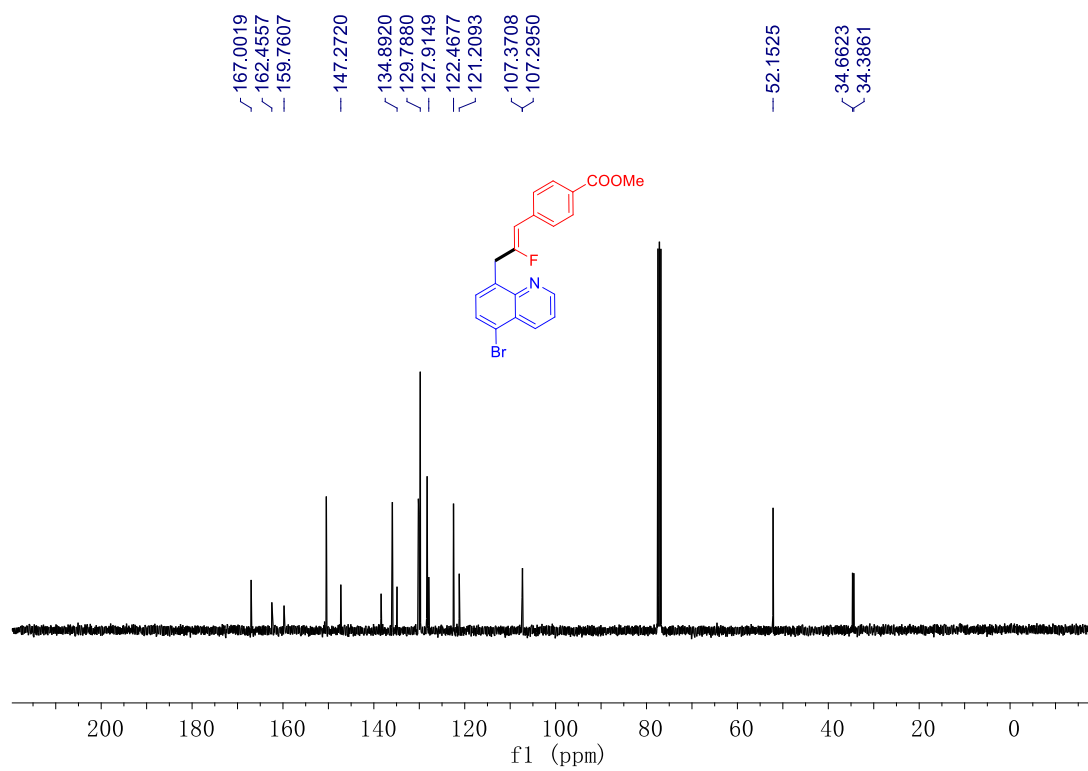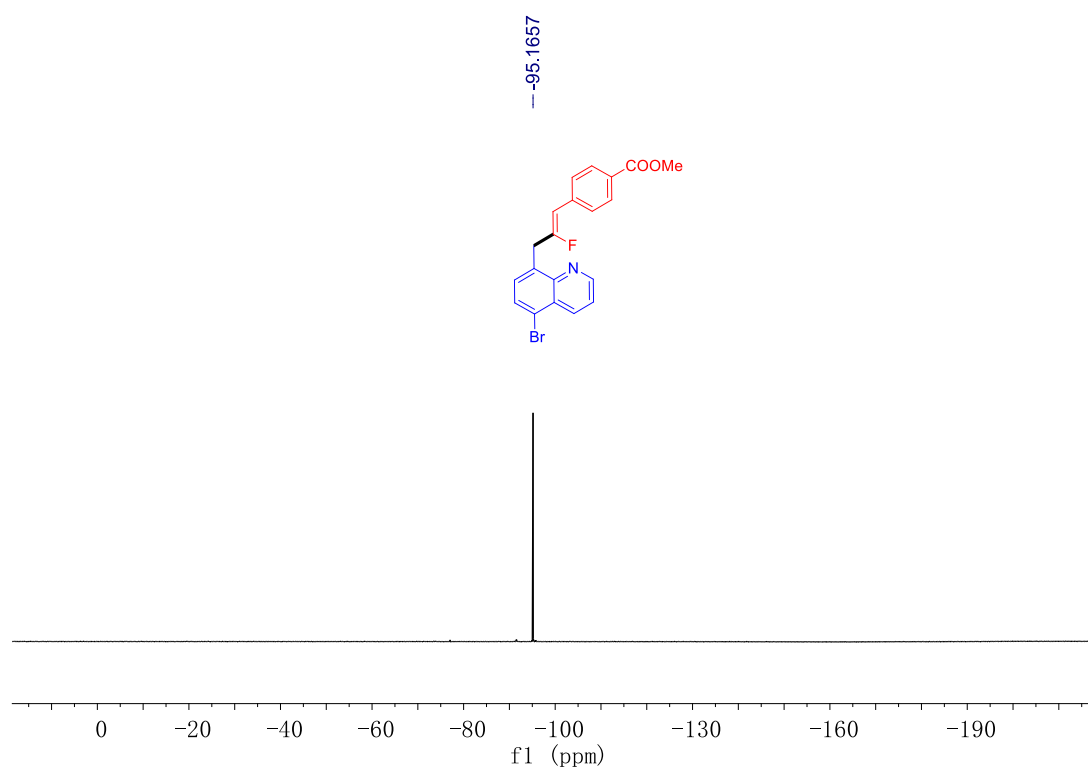



3ea

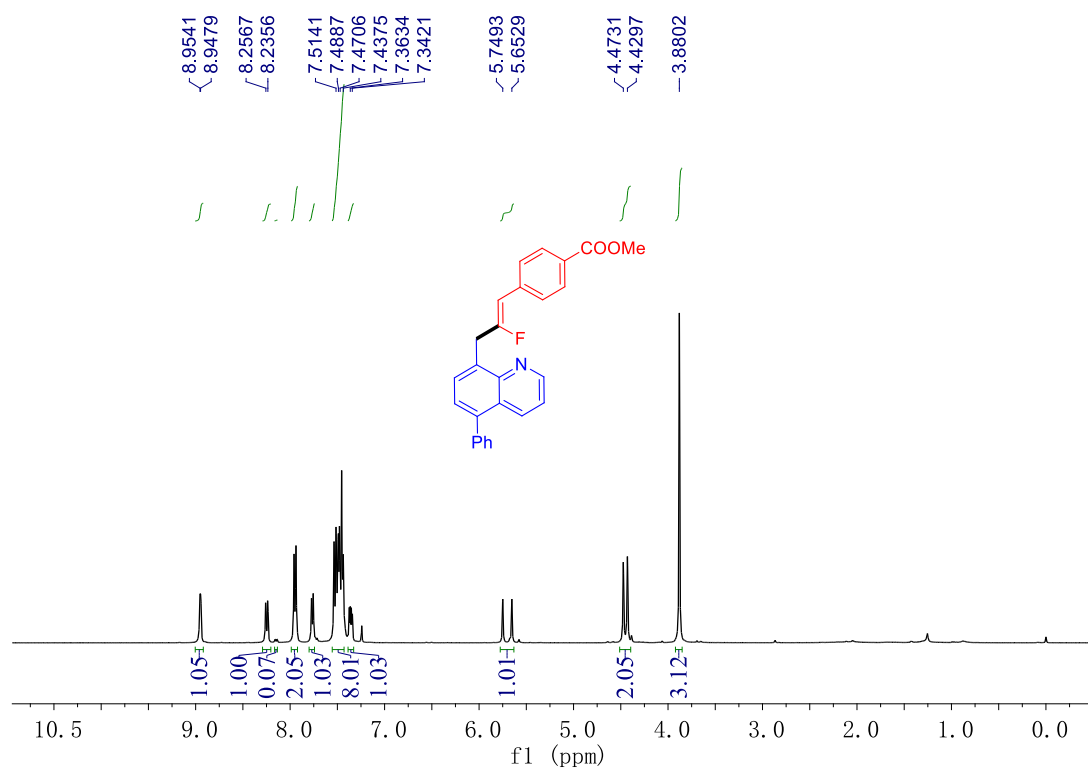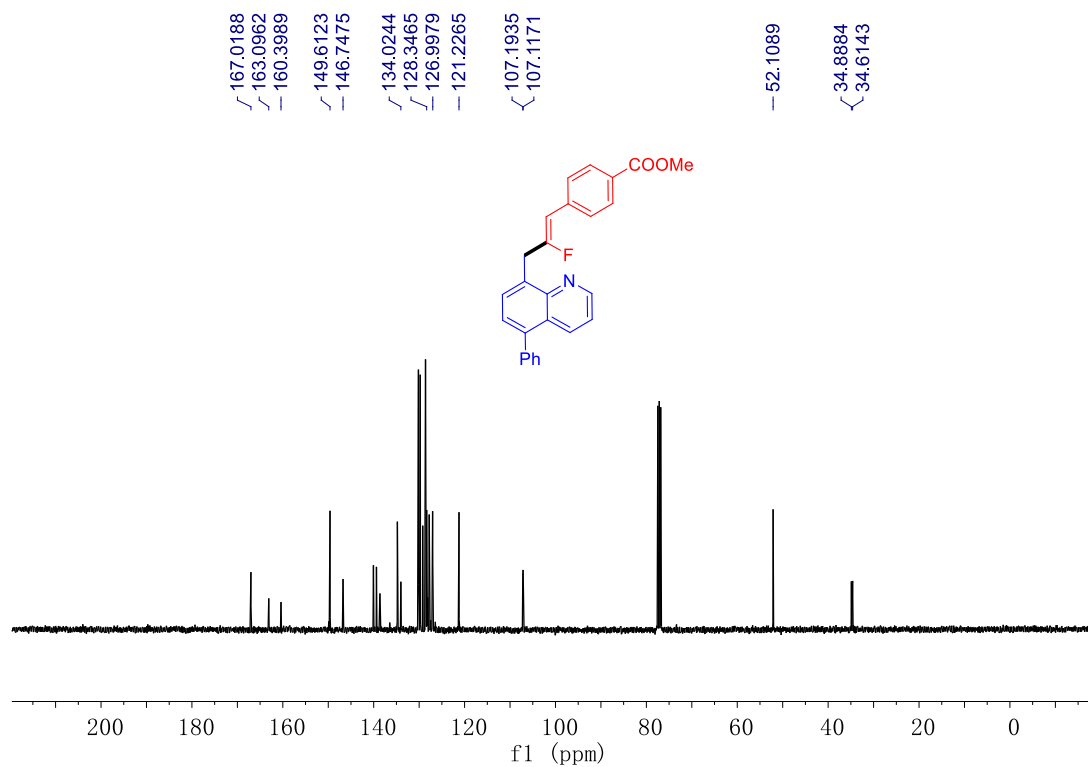

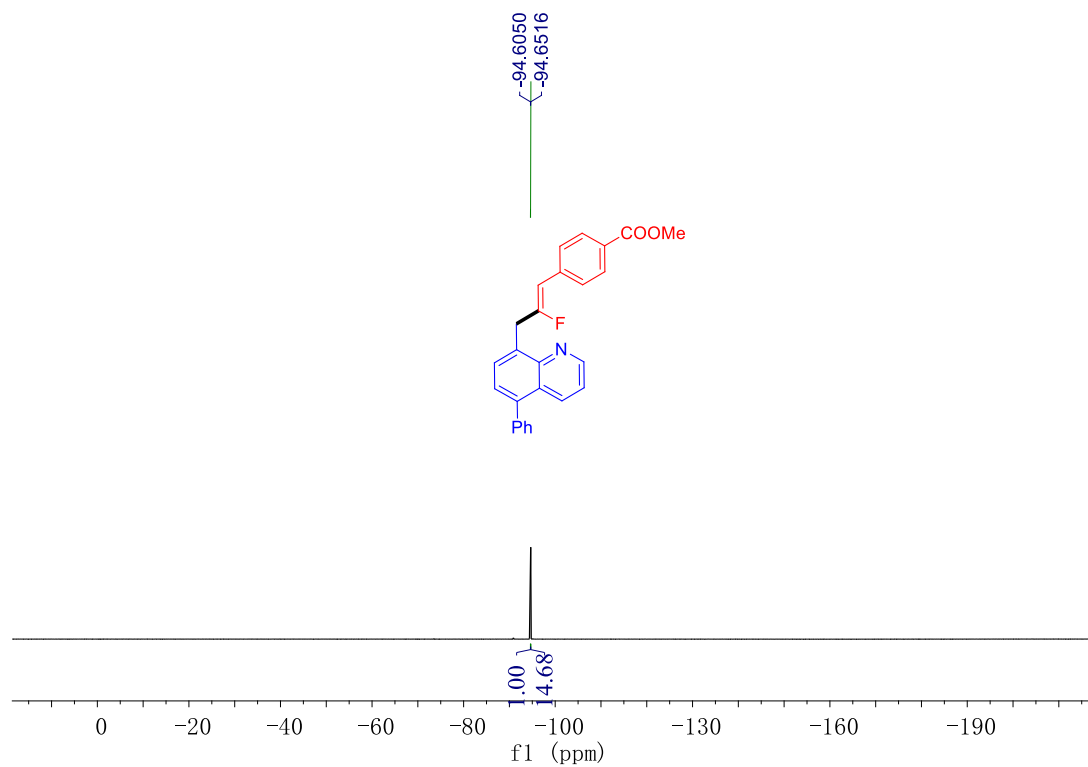

**3fa**

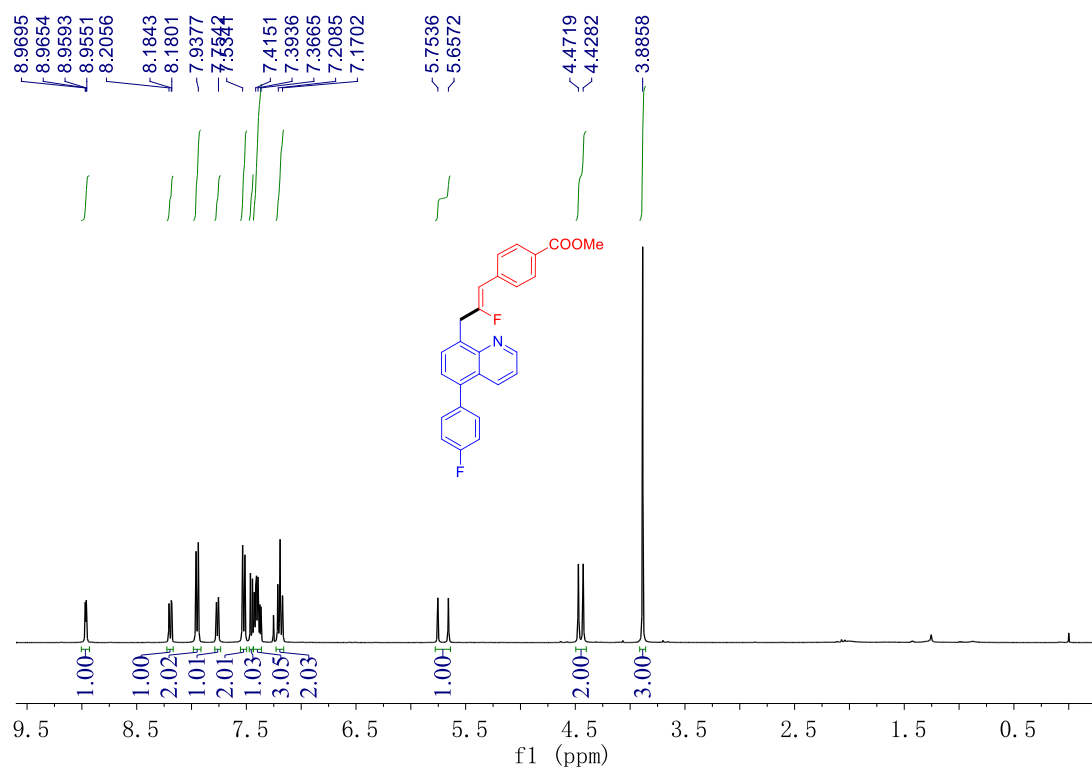

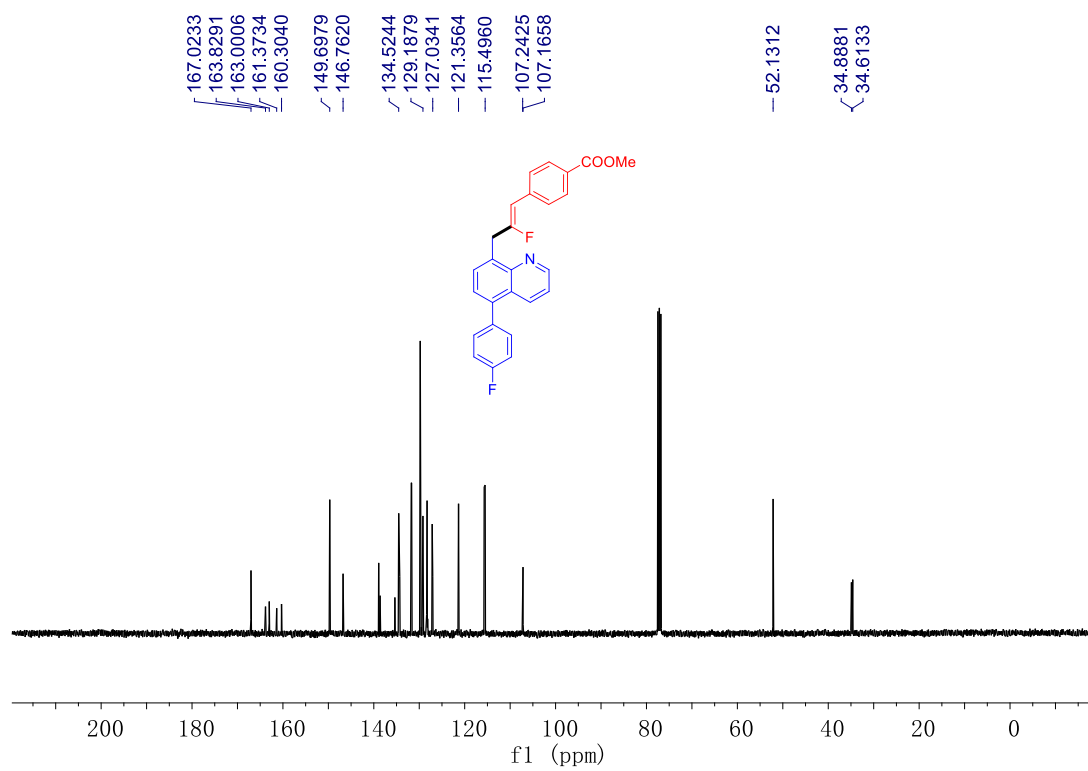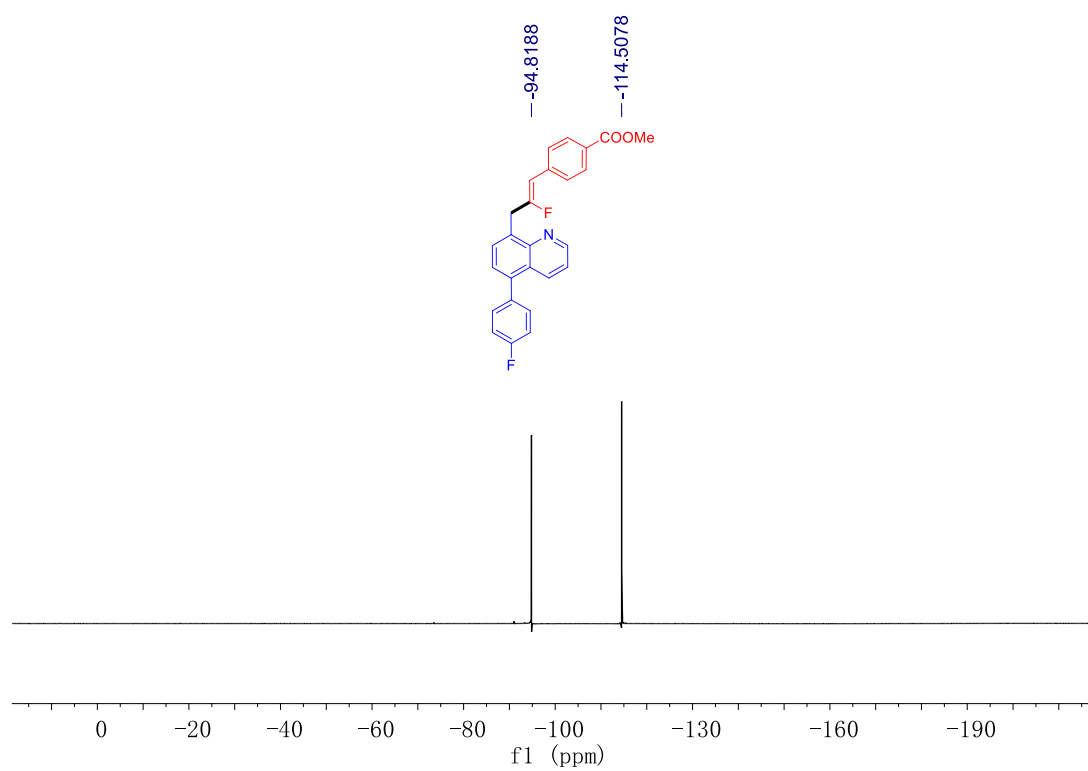

<sup>1</sup>H NMR spectrum (CDCl<sub>3</sub>) of compound 10. The x-axis represents the chemical shift in ppm (f1), ranging from 0 to 10. The spectrum shows several peaks corresponding to the structure of compound 10, which is a 2-(4-(methoxycarbonyl)benzylidene)-2-fluoro-1-(naphthalen-1-yl)ethane. The peaks are labeled with their chemical shifts (ppm) and integration values.

Chemical structure of compound 10 is shown above the spectrum:

COC(=O)c1ccc(cc1)/C=C/C(F)c2cnc3ccccc3c2

Peak list (ppm): 8.9738, 8.9696, 8.9636, 8.9594, 8.2890, 8.2676, 7.9652, 7.8820, 7.7887, 7.5597, 7.5393, 7.3738, 7.3421, 5.7582, 5.6618, 4.4972, 4.4541, 3.8844.

Integration values (from left to right): 1.00, 1.00, 6.05, 1.02, 6.01, 1.01, 1.01, 2.00, 3.00.

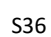

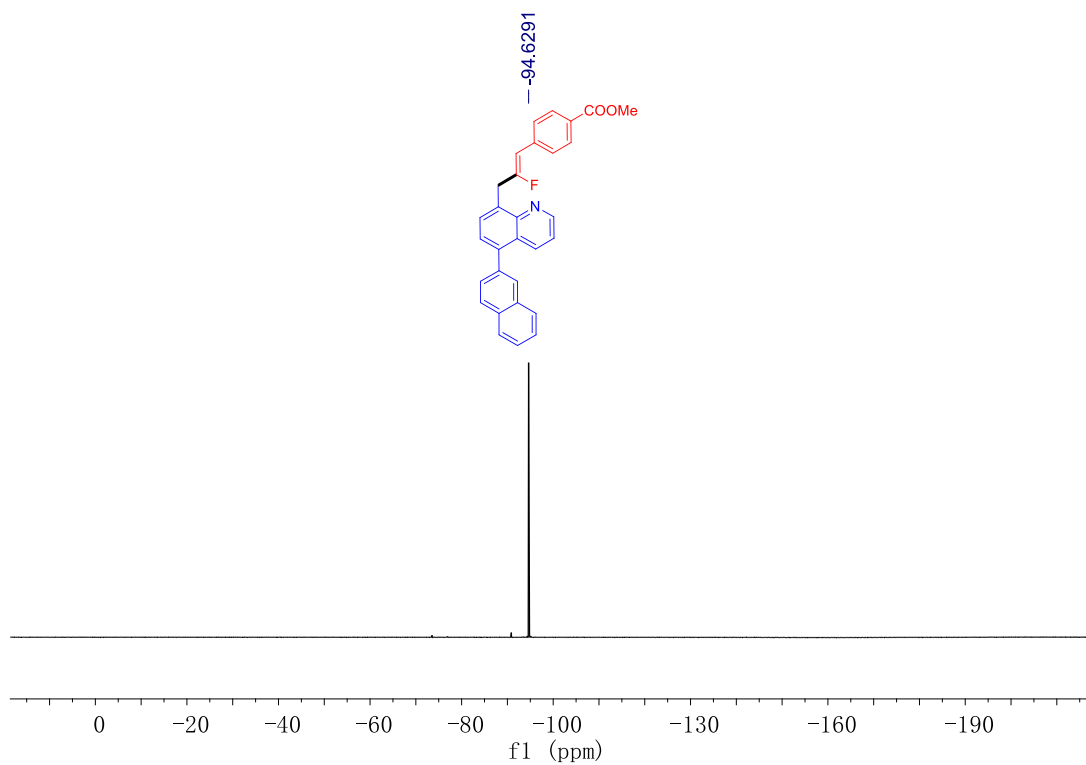

### 3ha

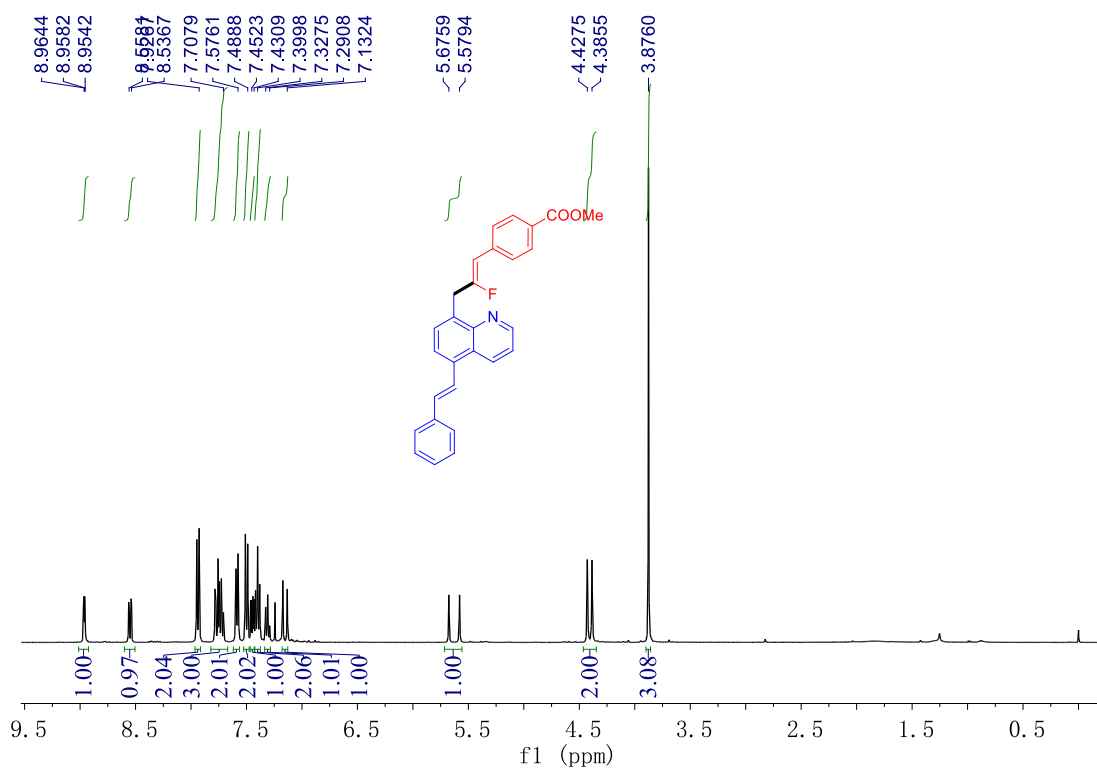

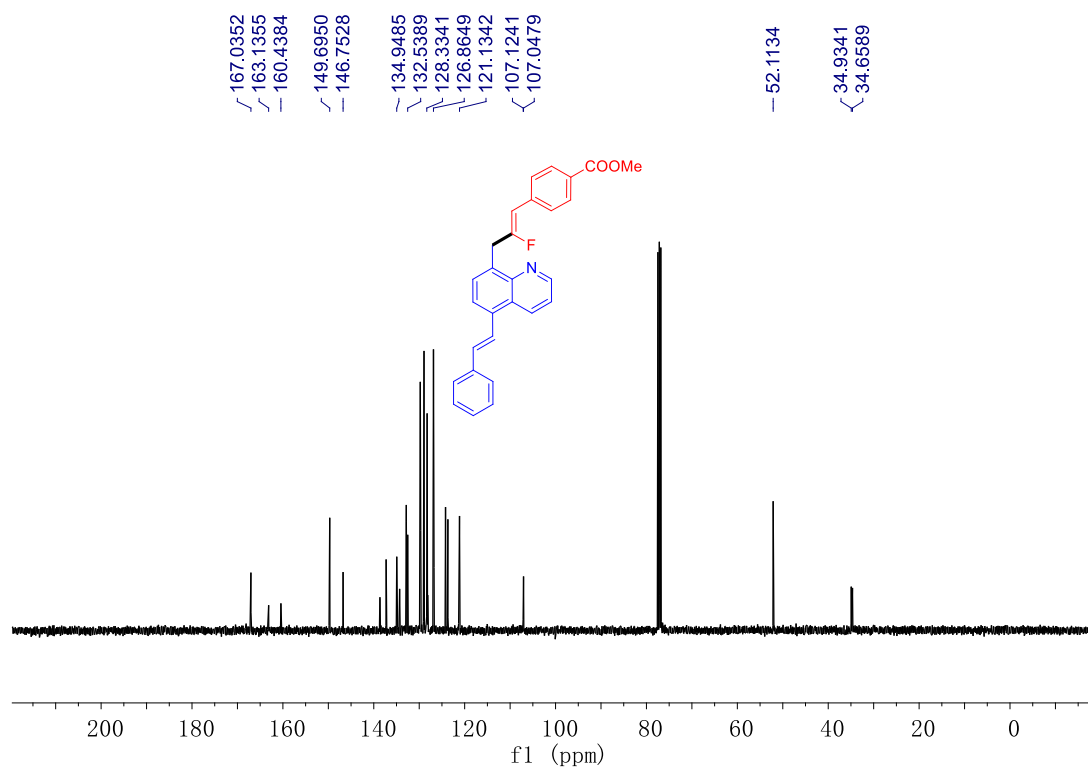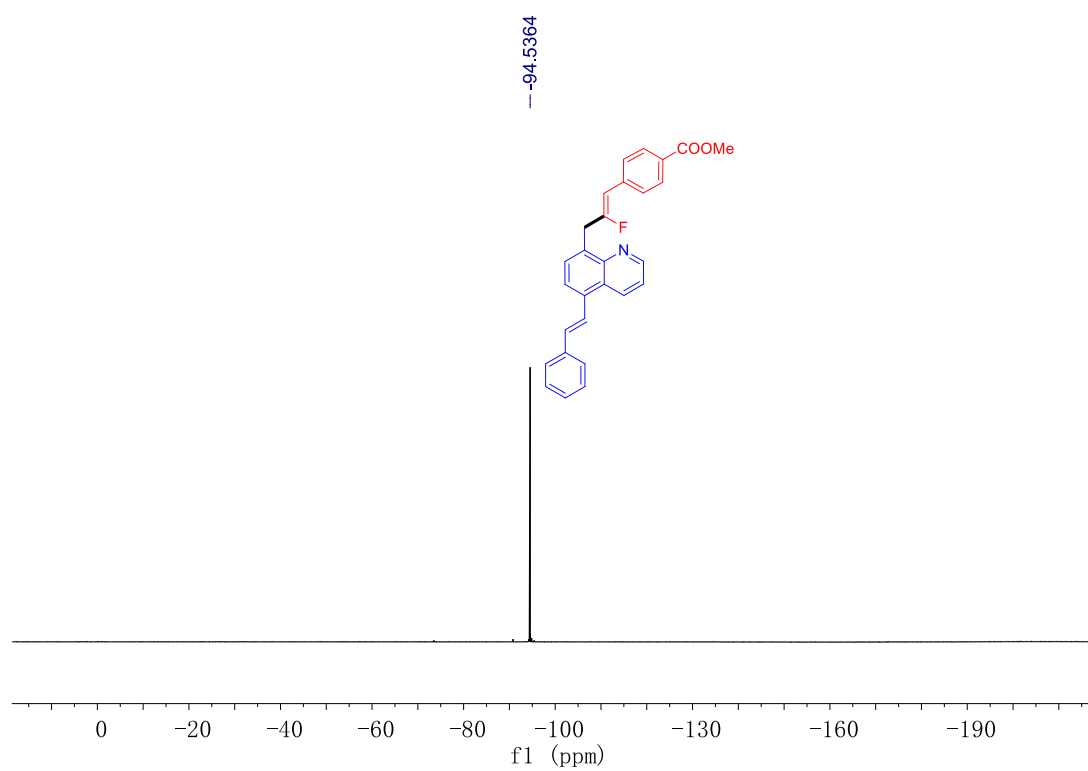

3ia

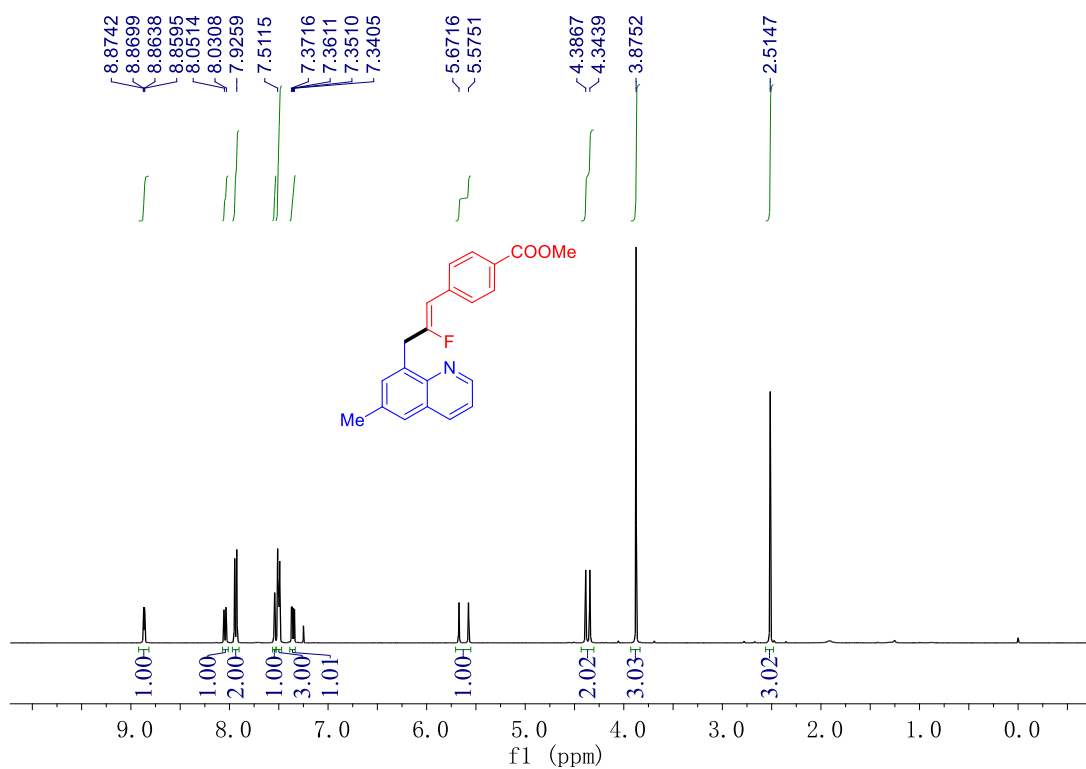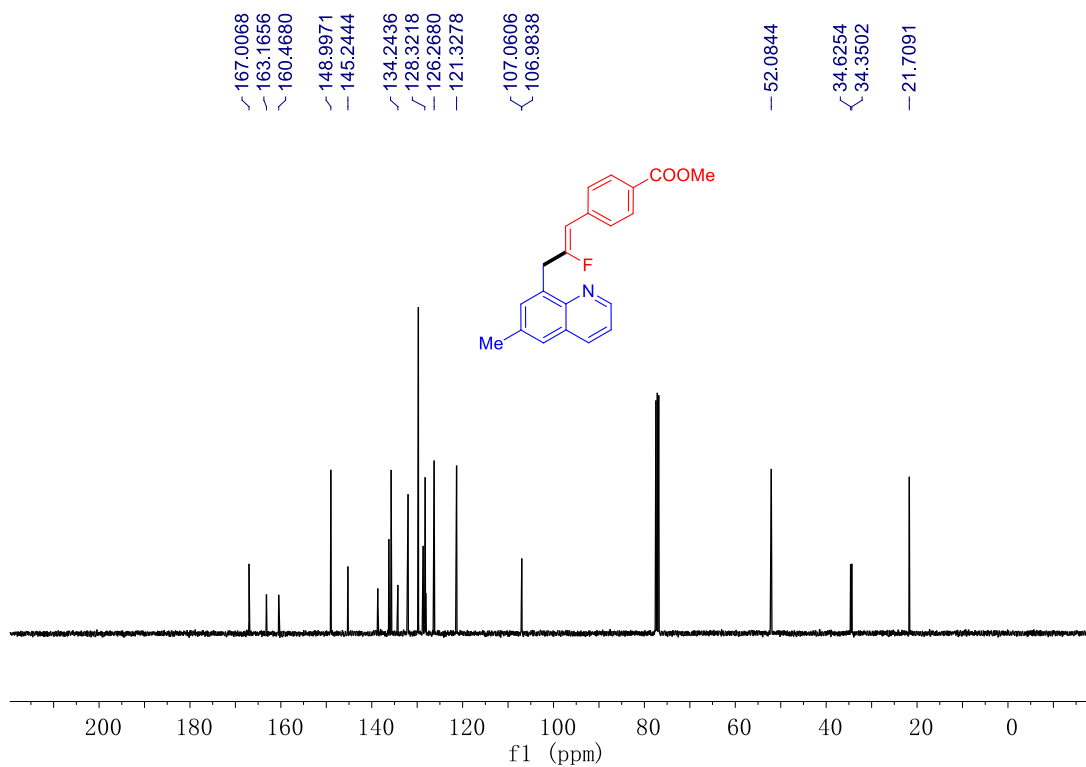

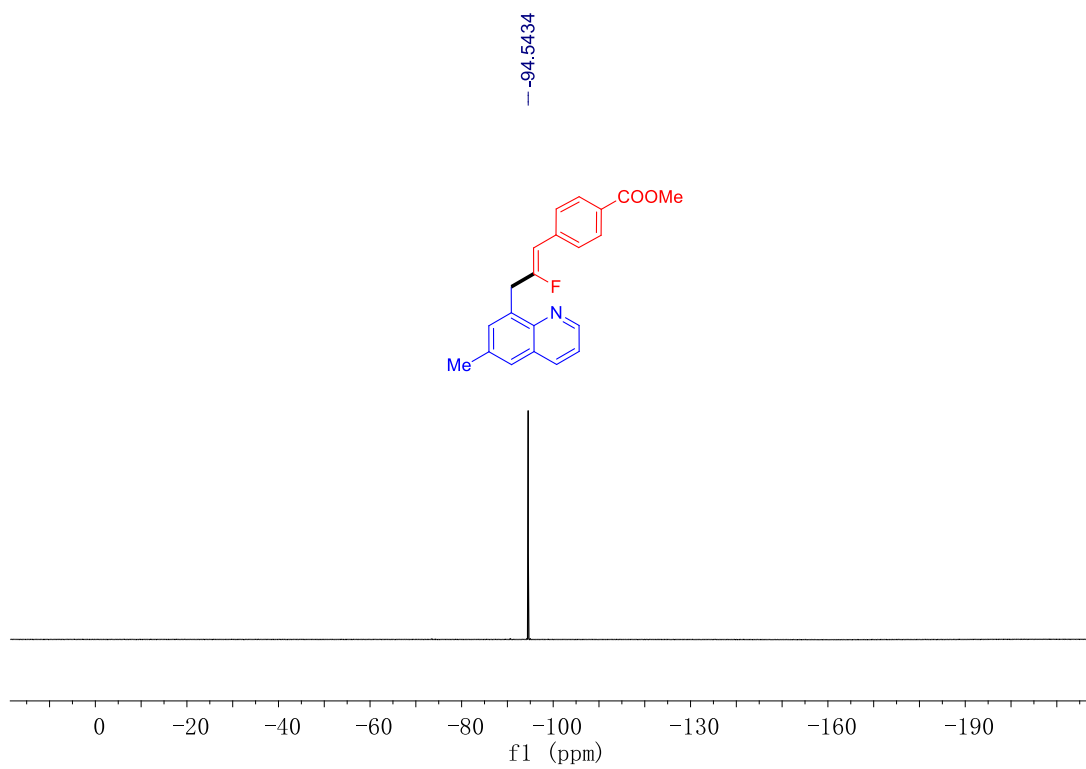

**3ja**

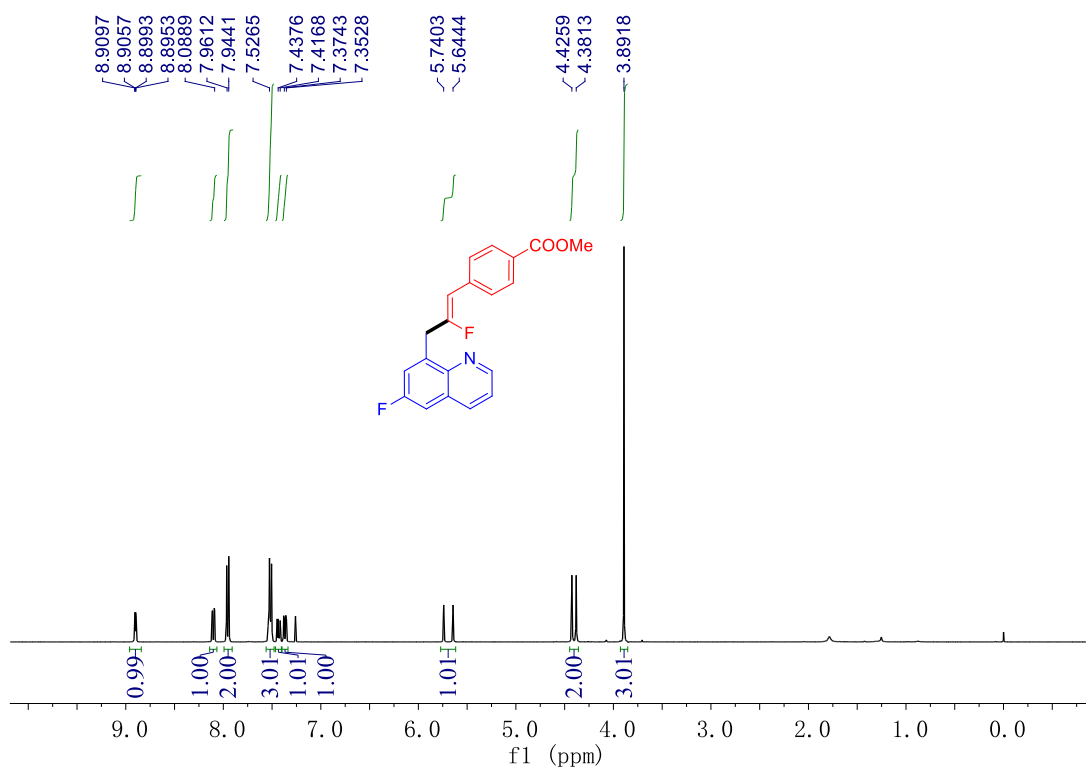



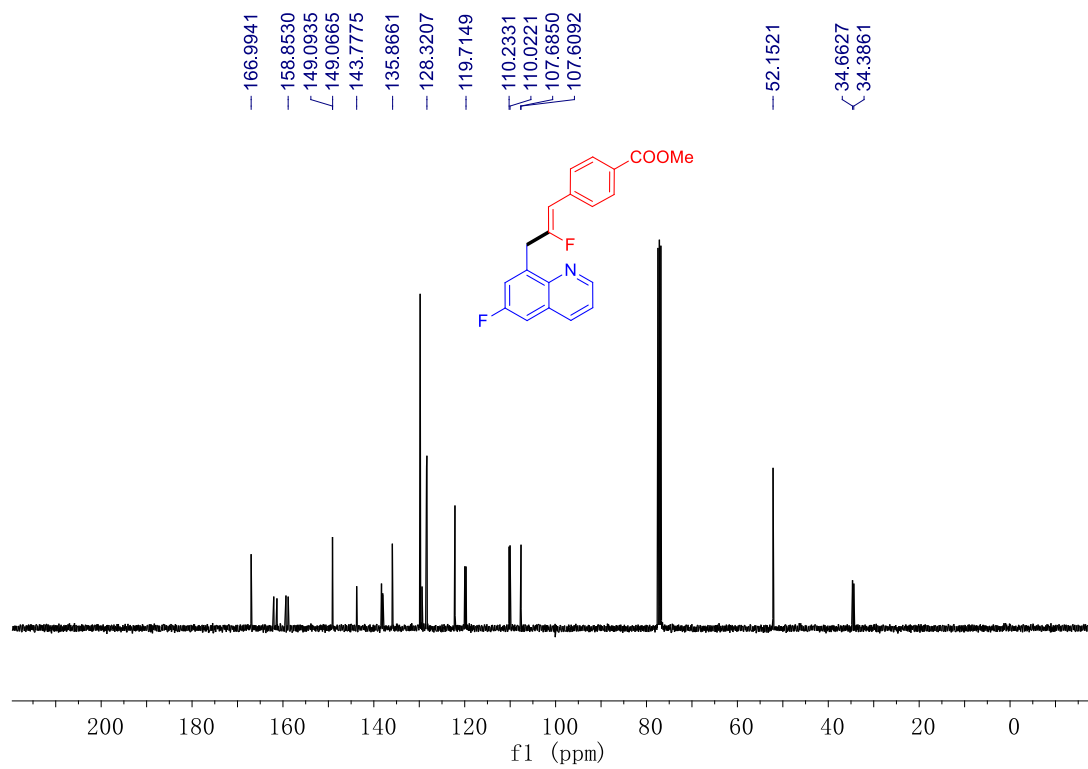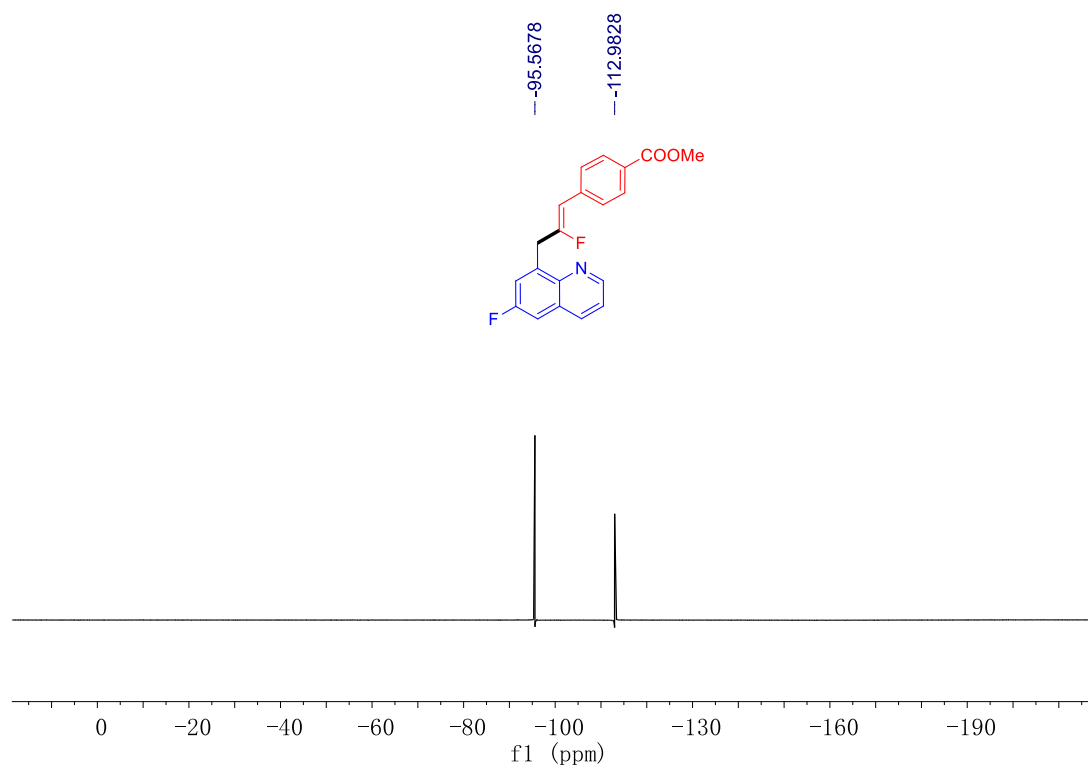

3ka

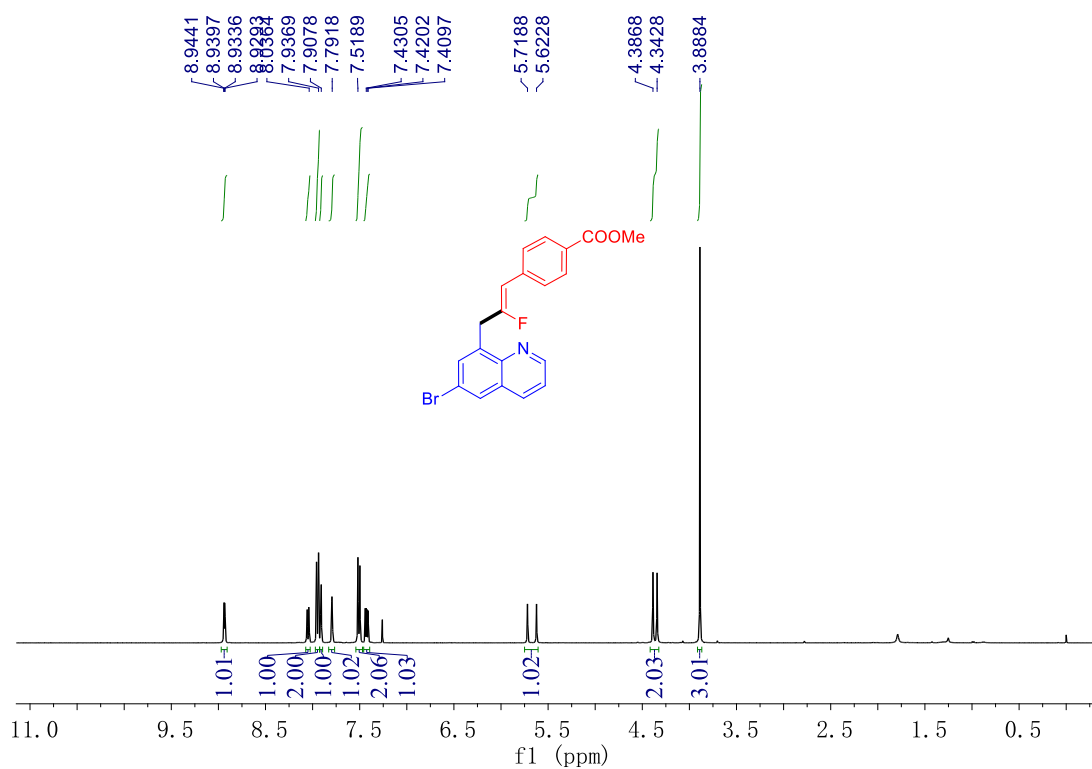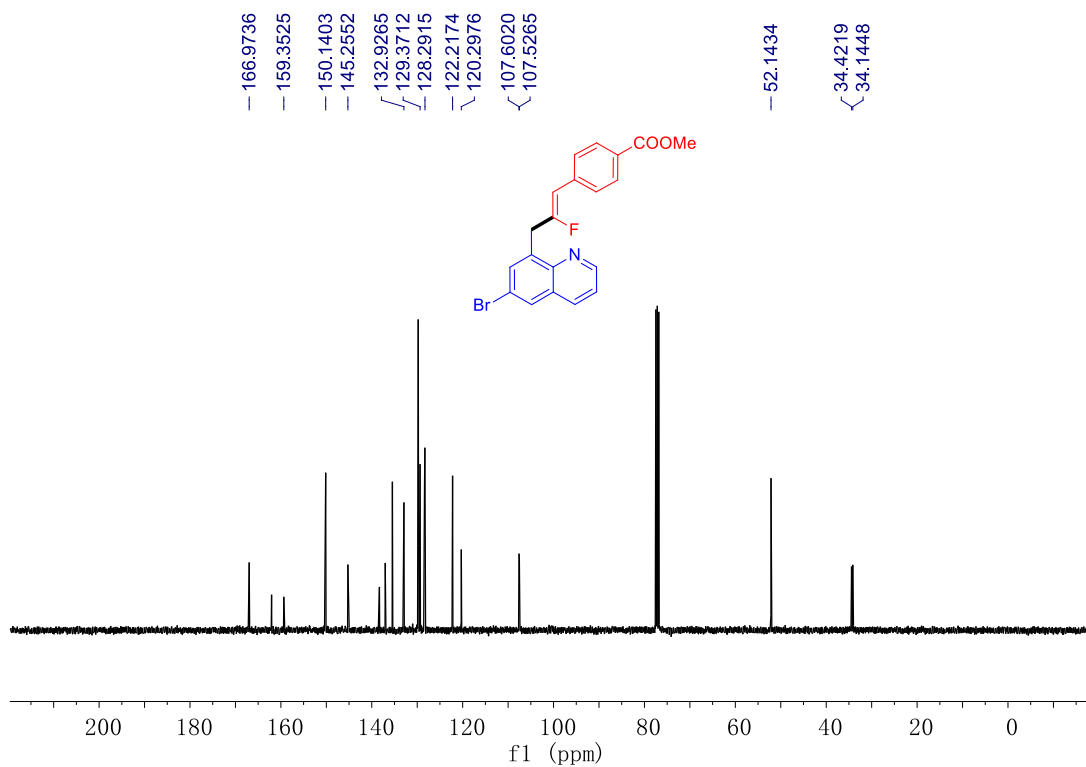

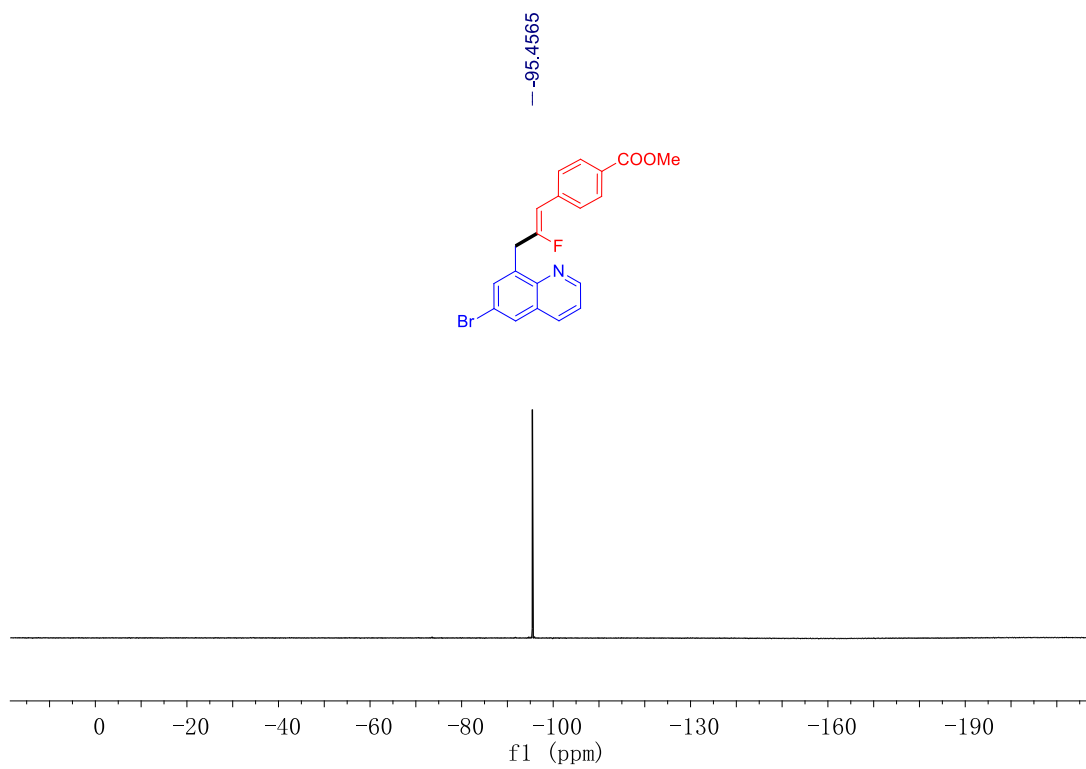

**3la**

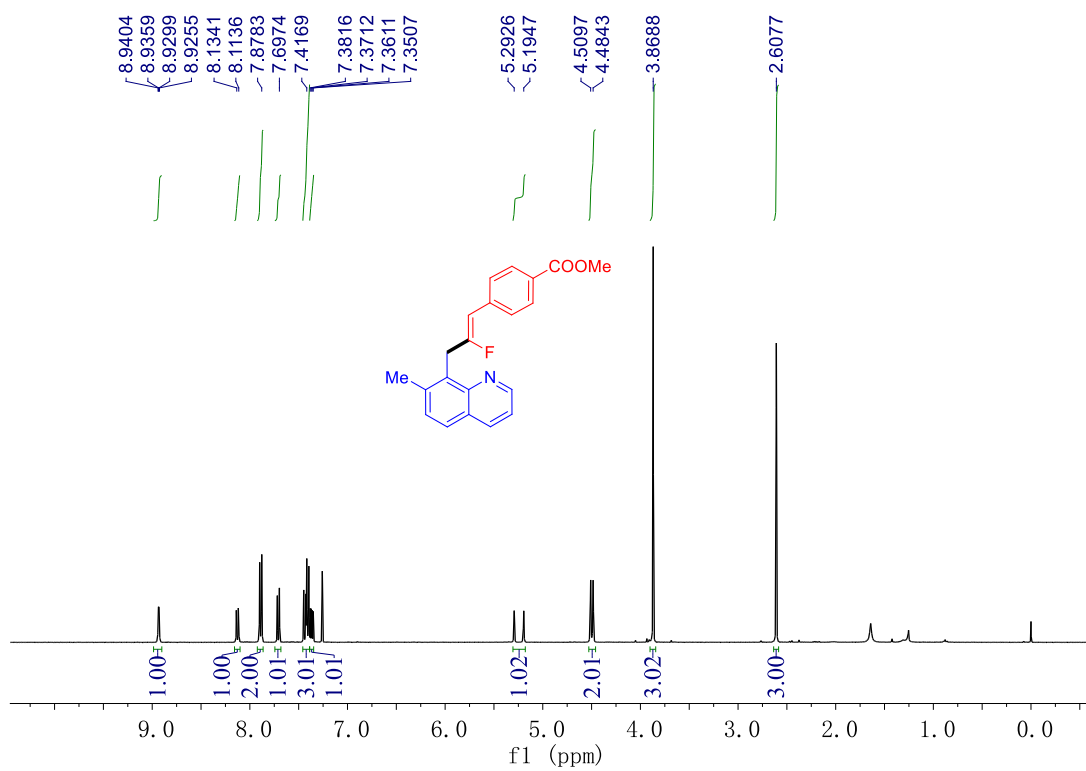

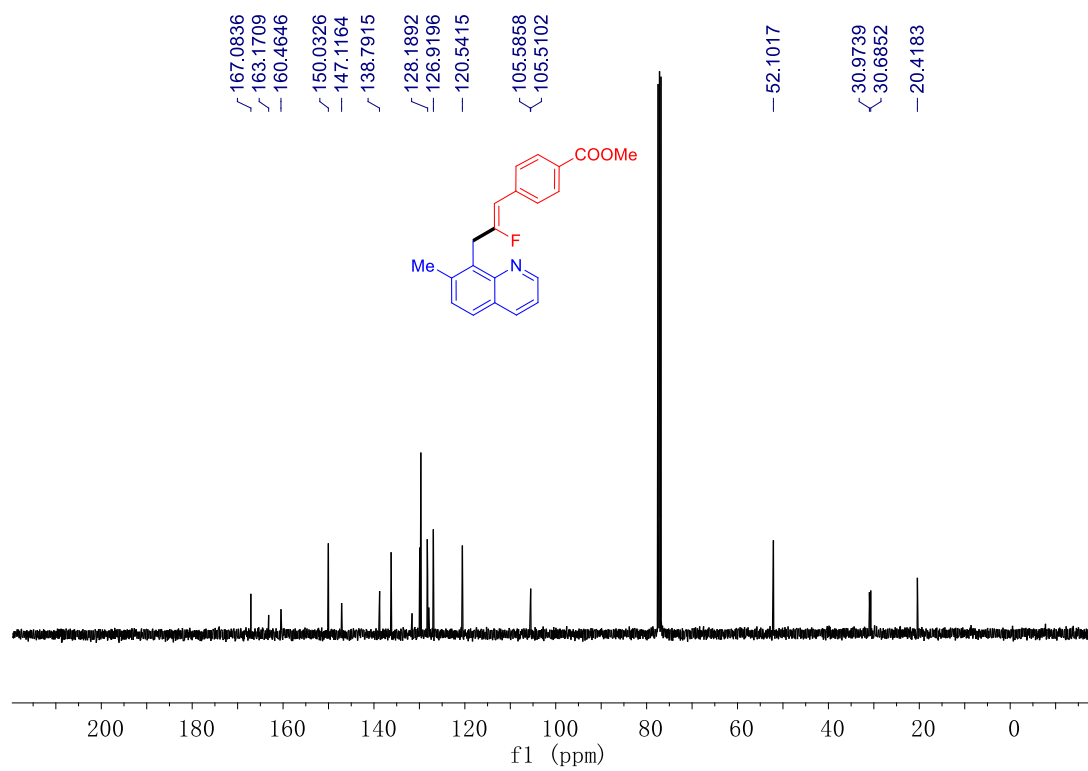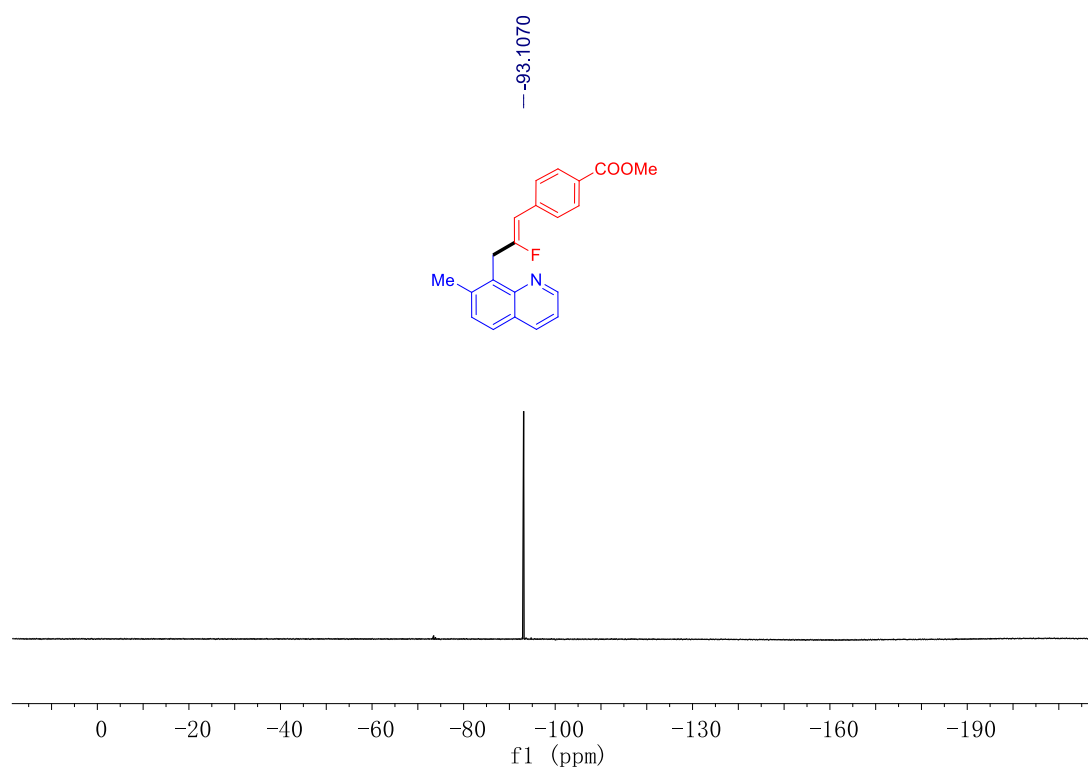

3ma

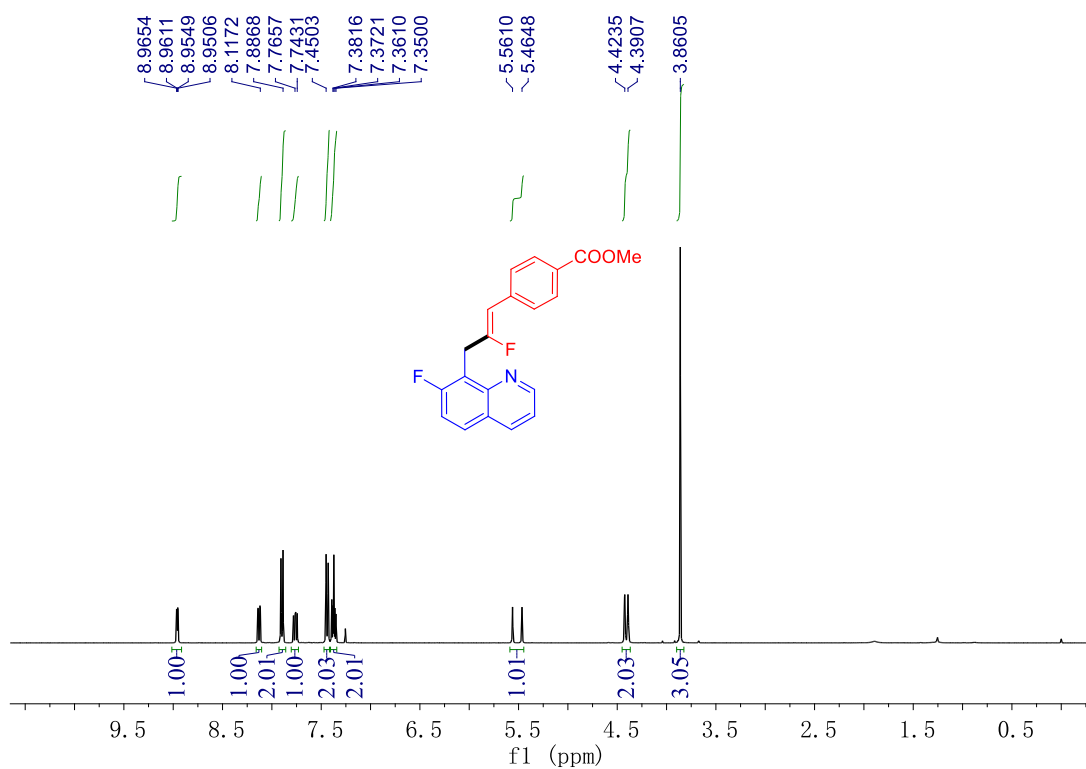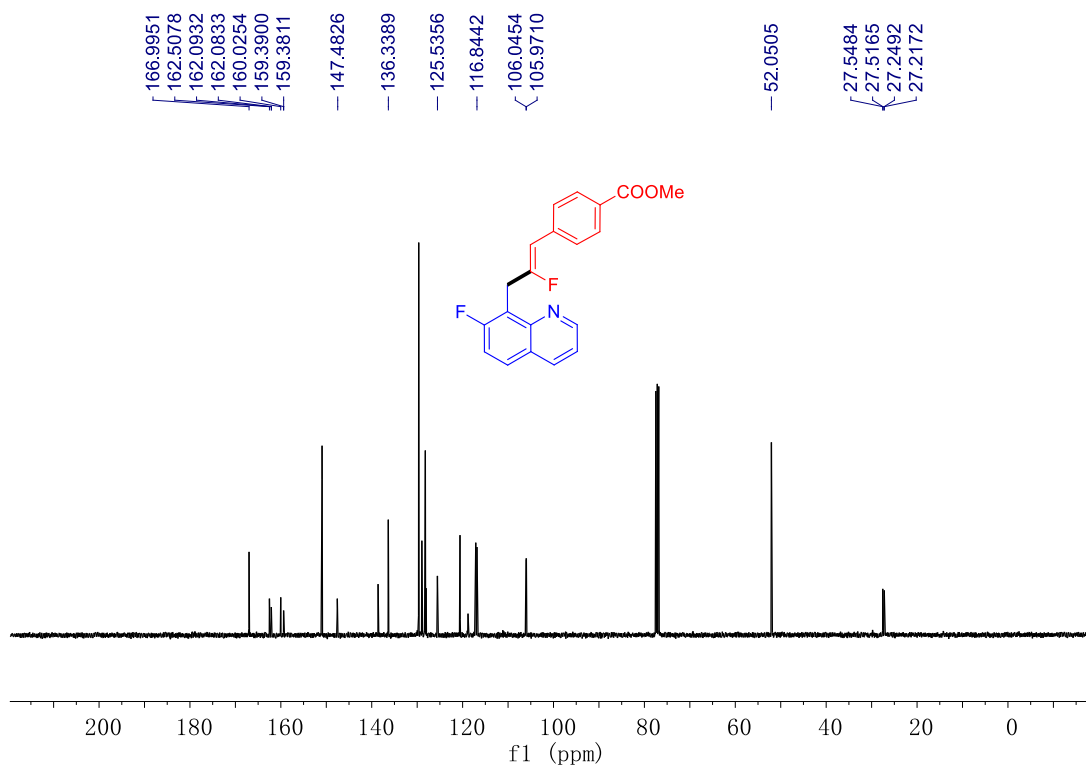

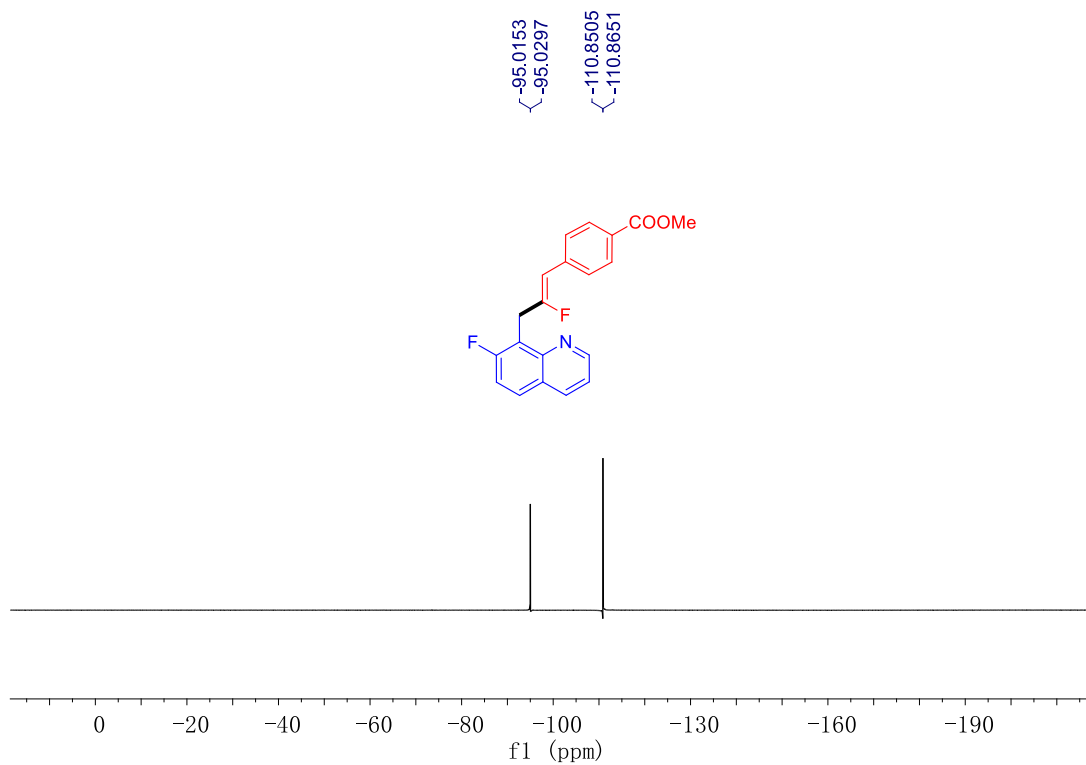

### 3na

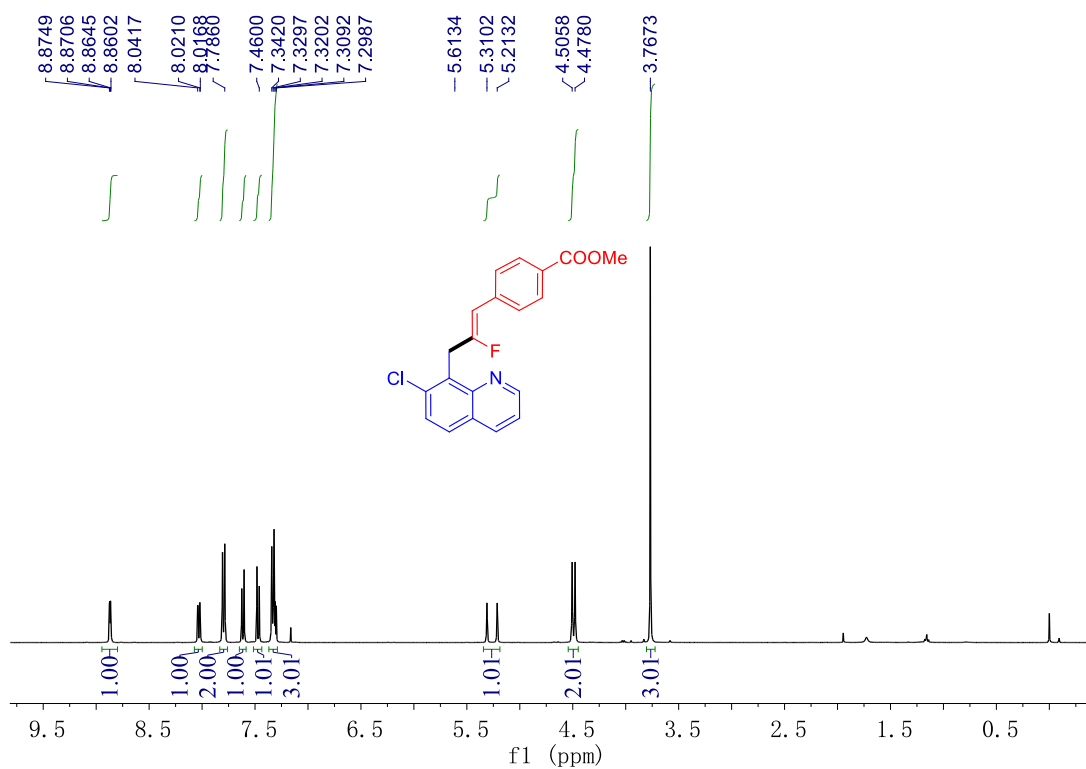

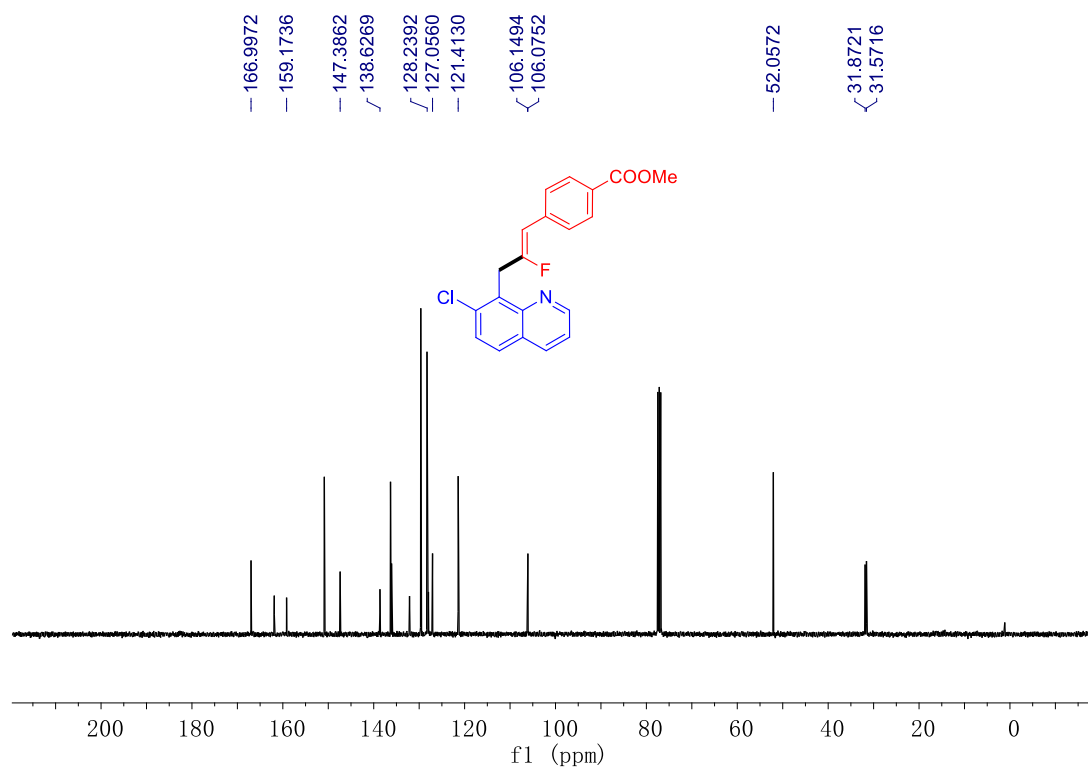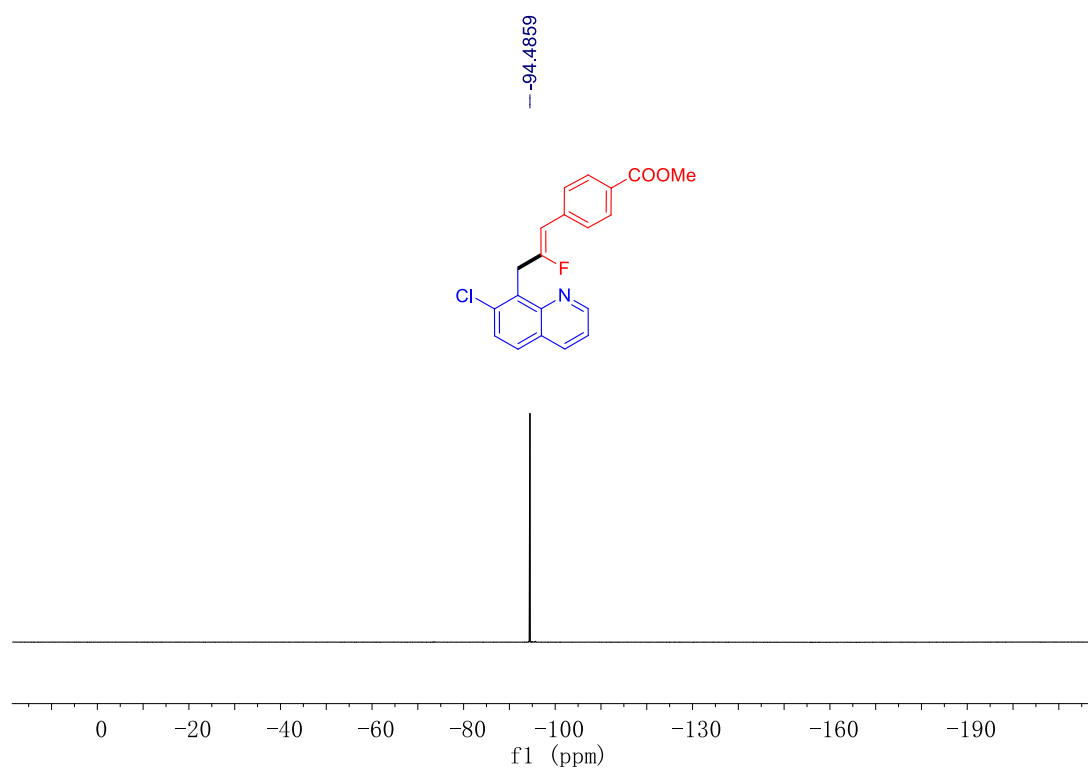

30a

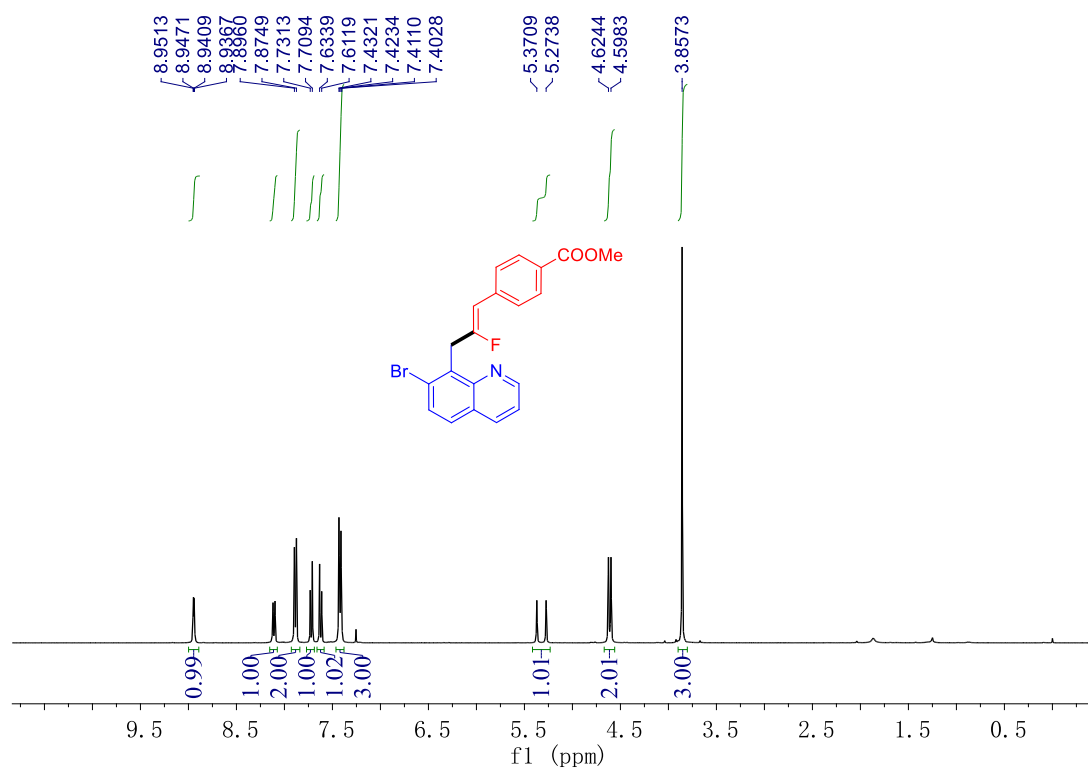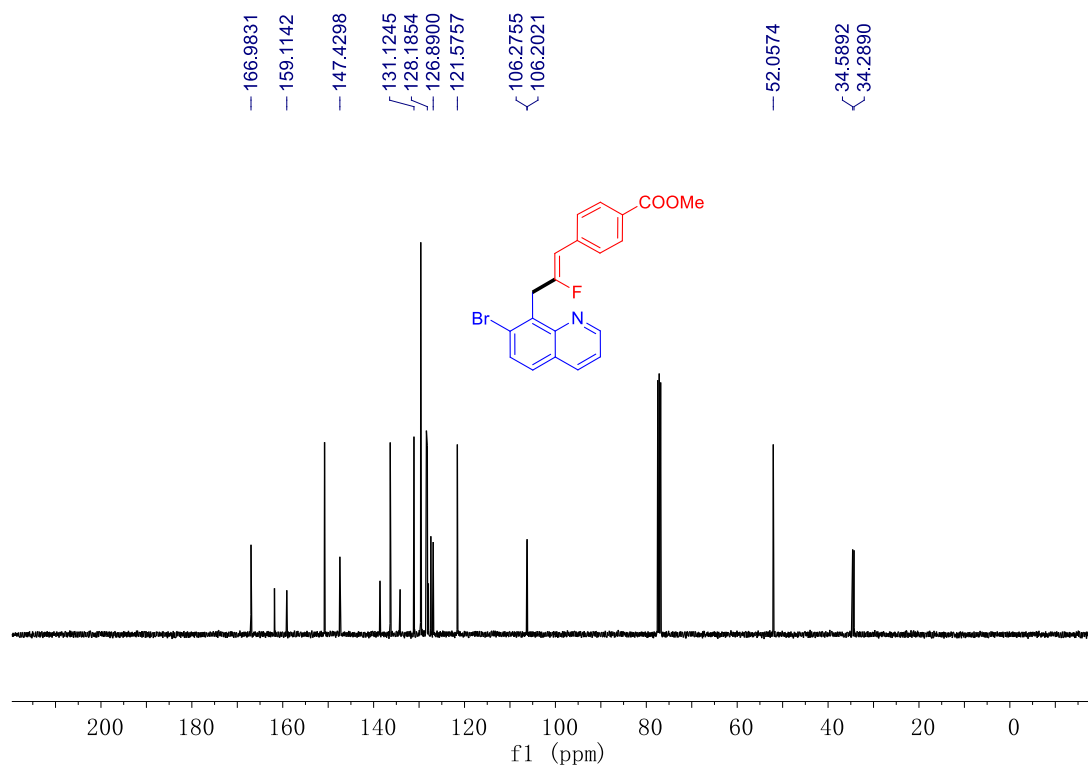



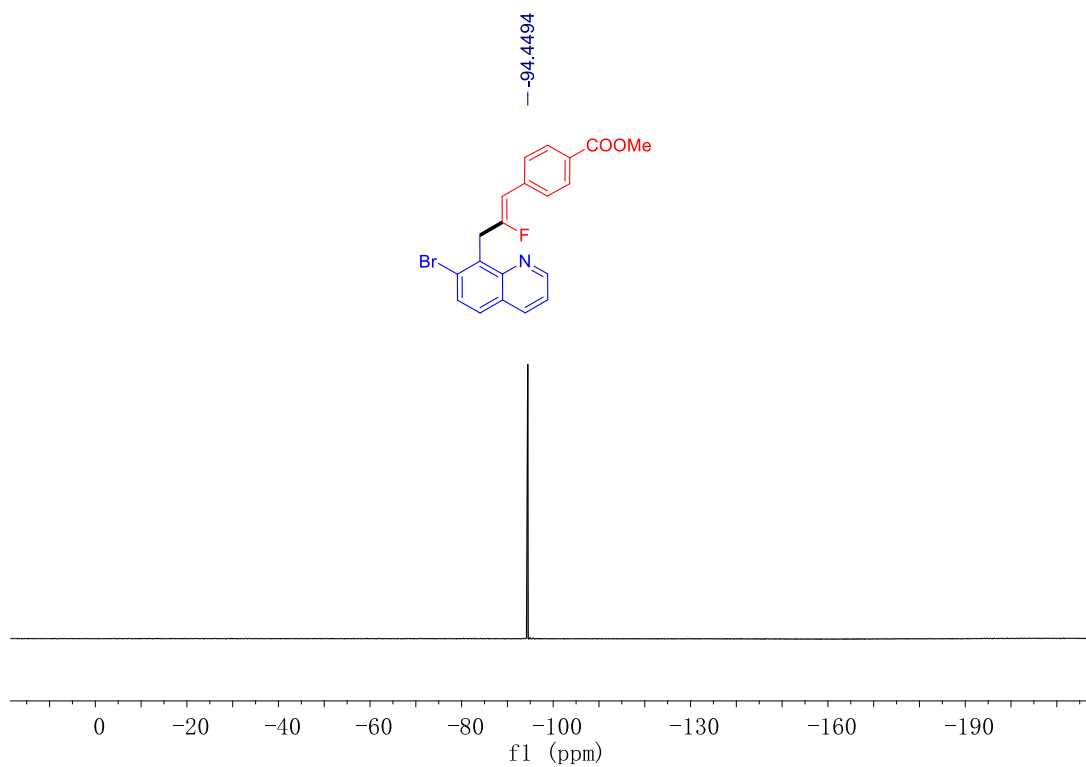

**3pa**

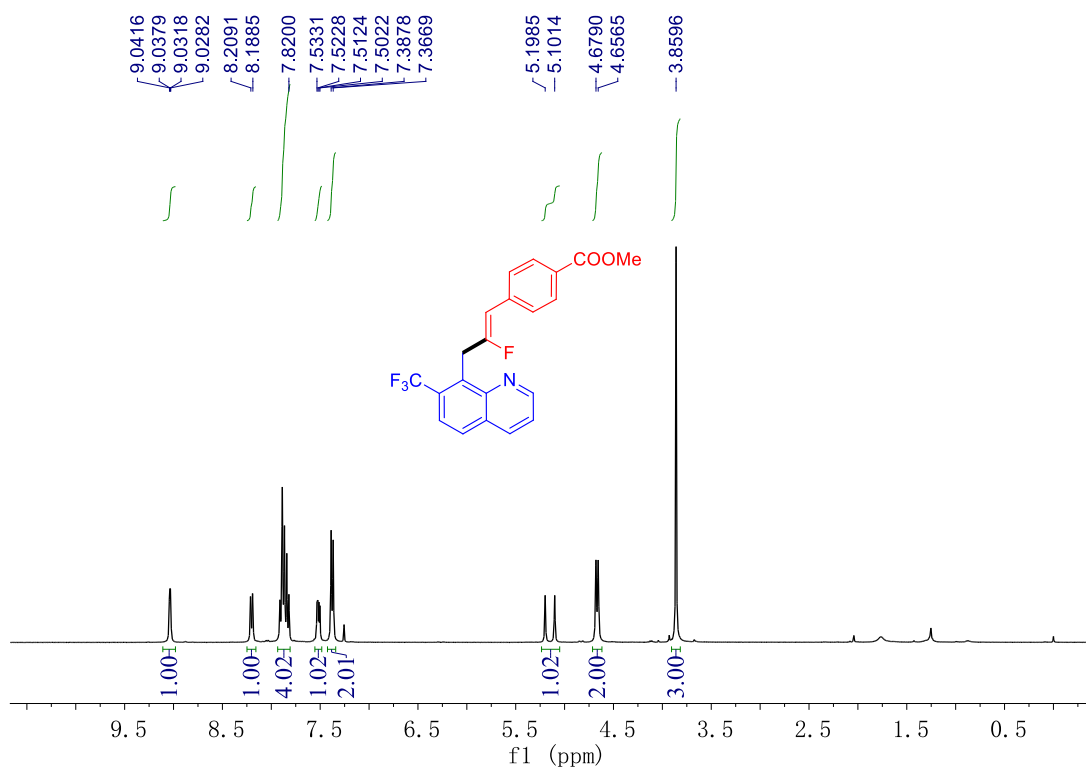

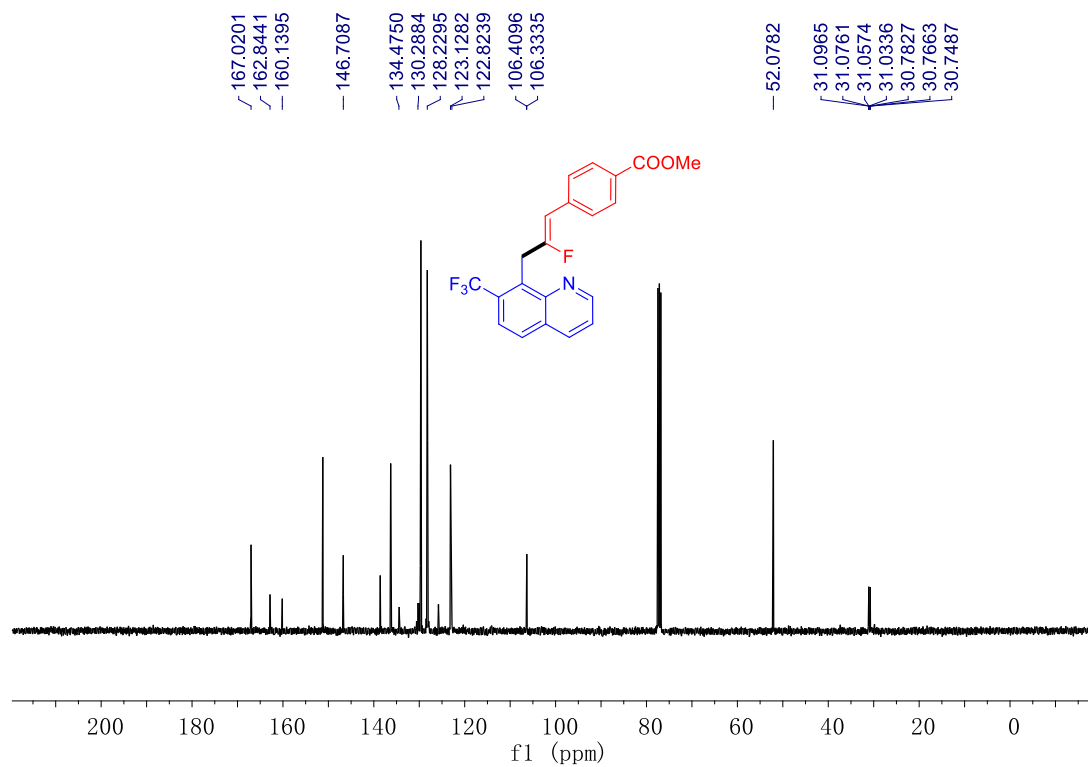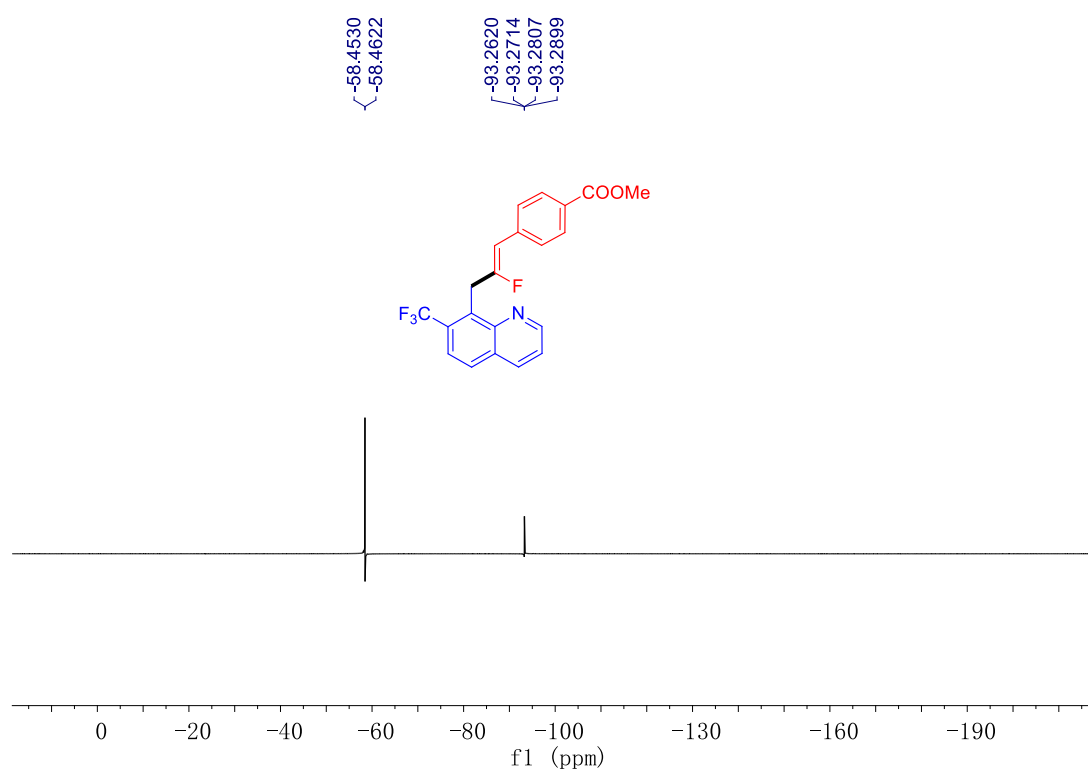

3qa

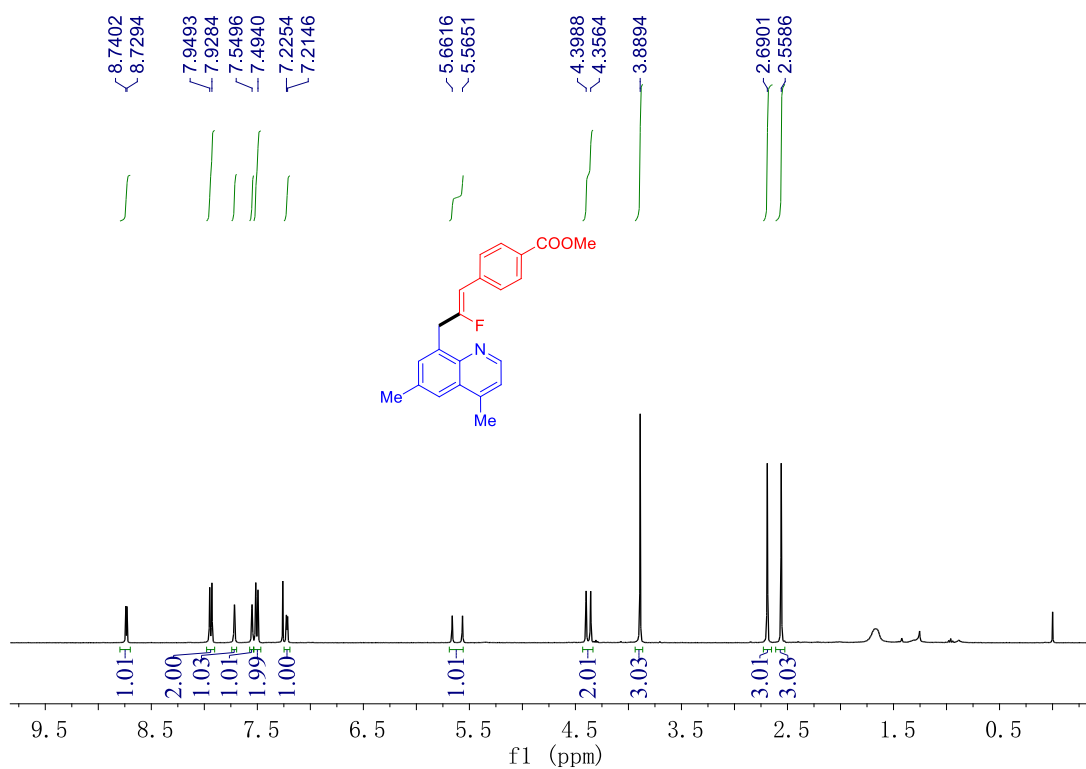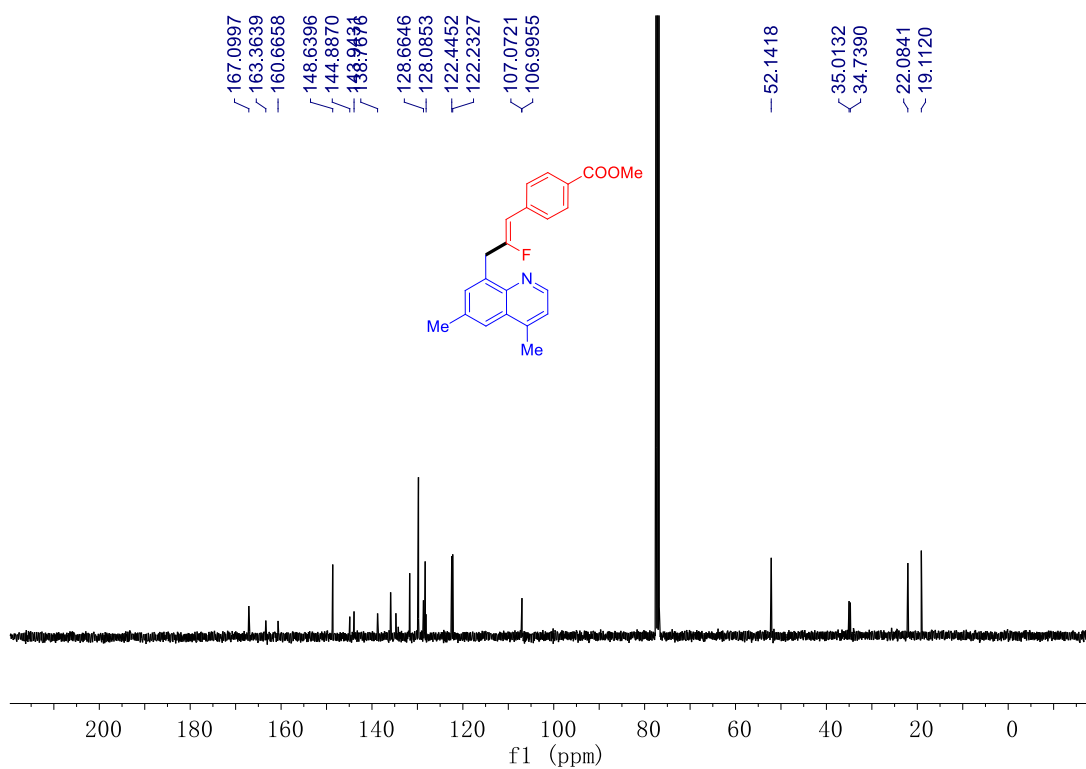

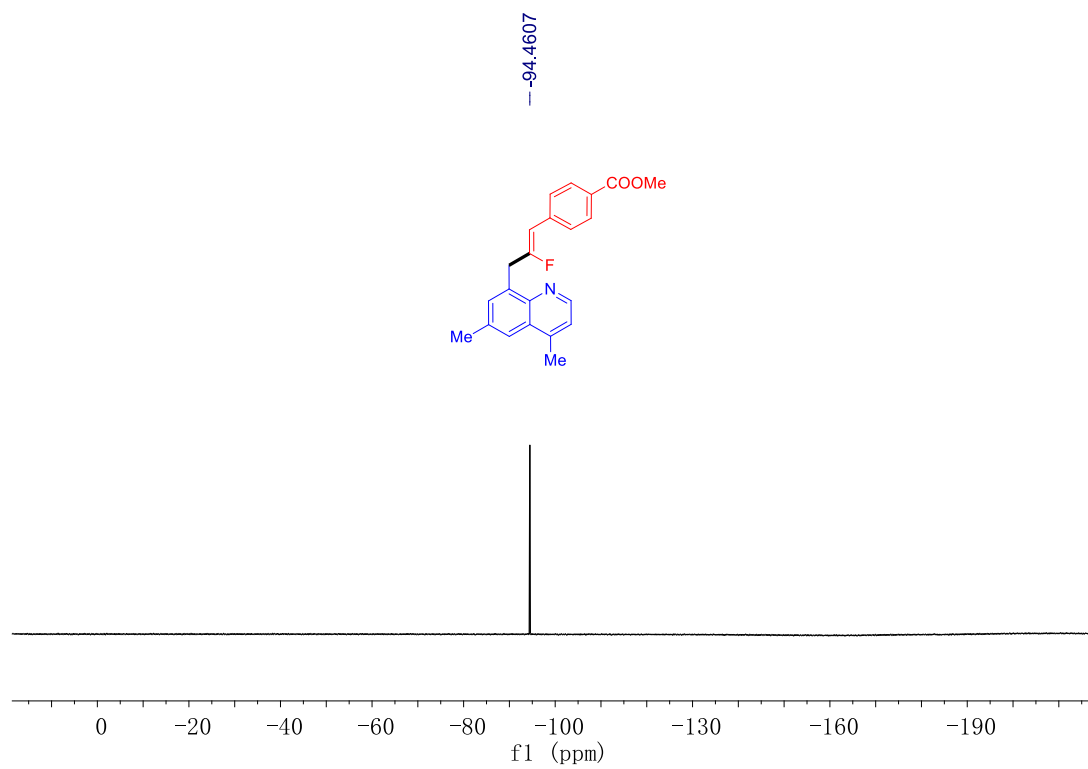

**3ab**

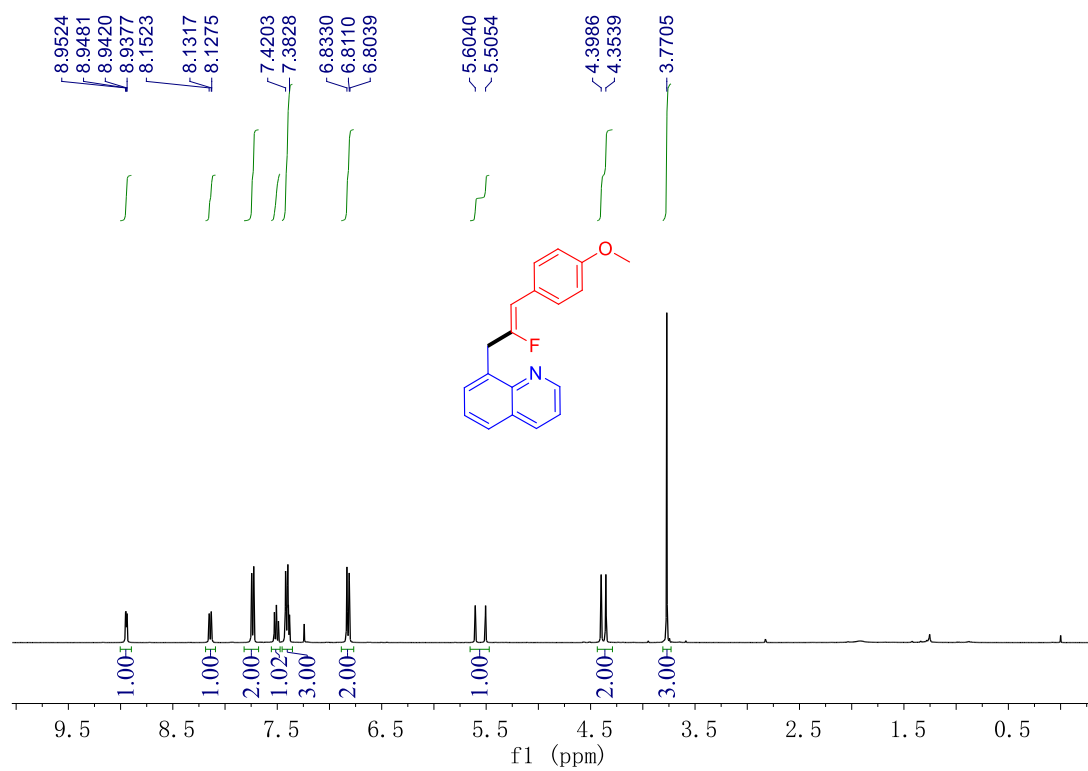

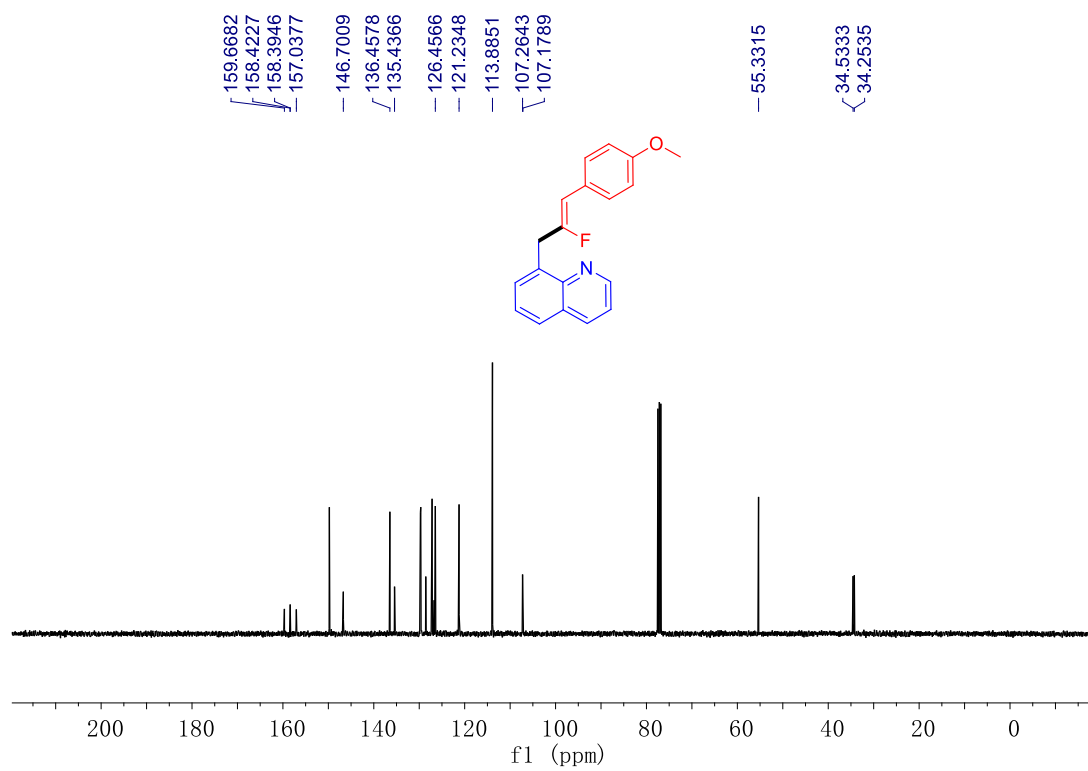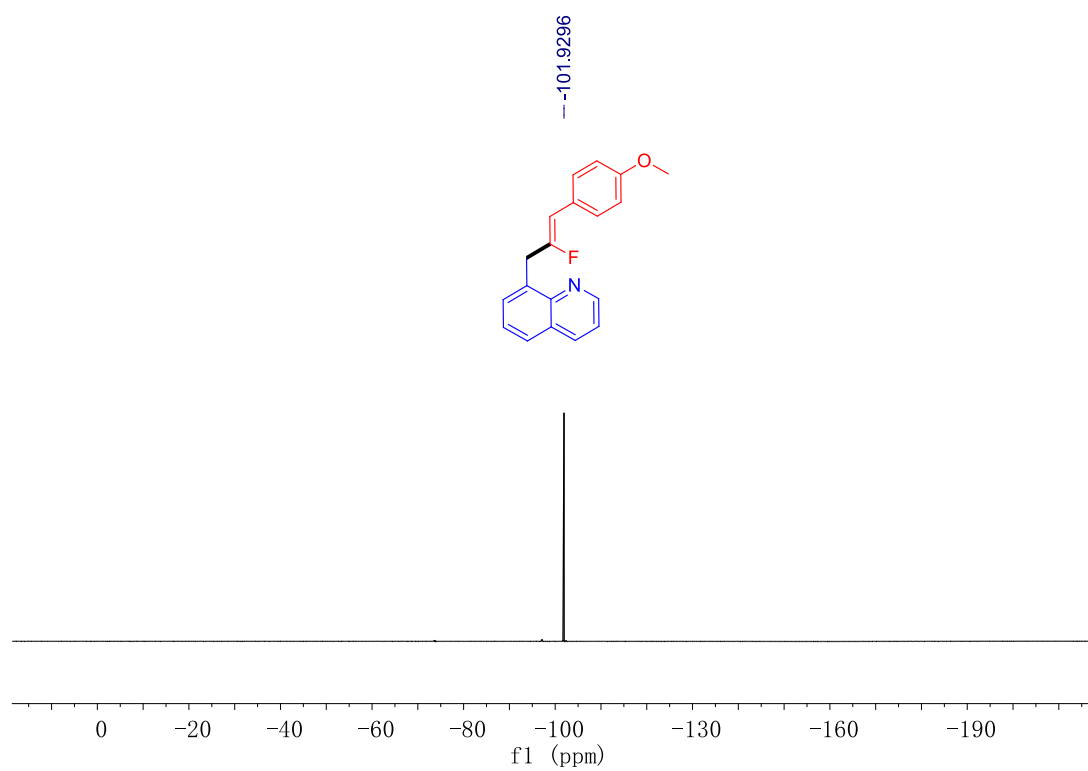

3ob

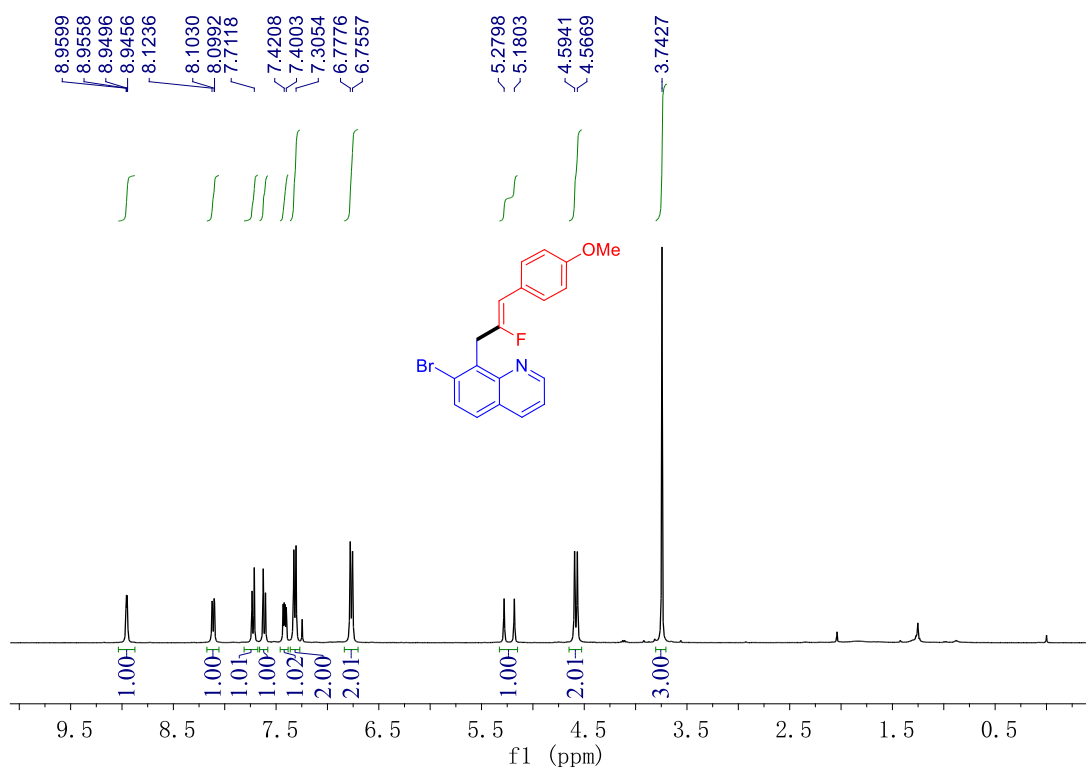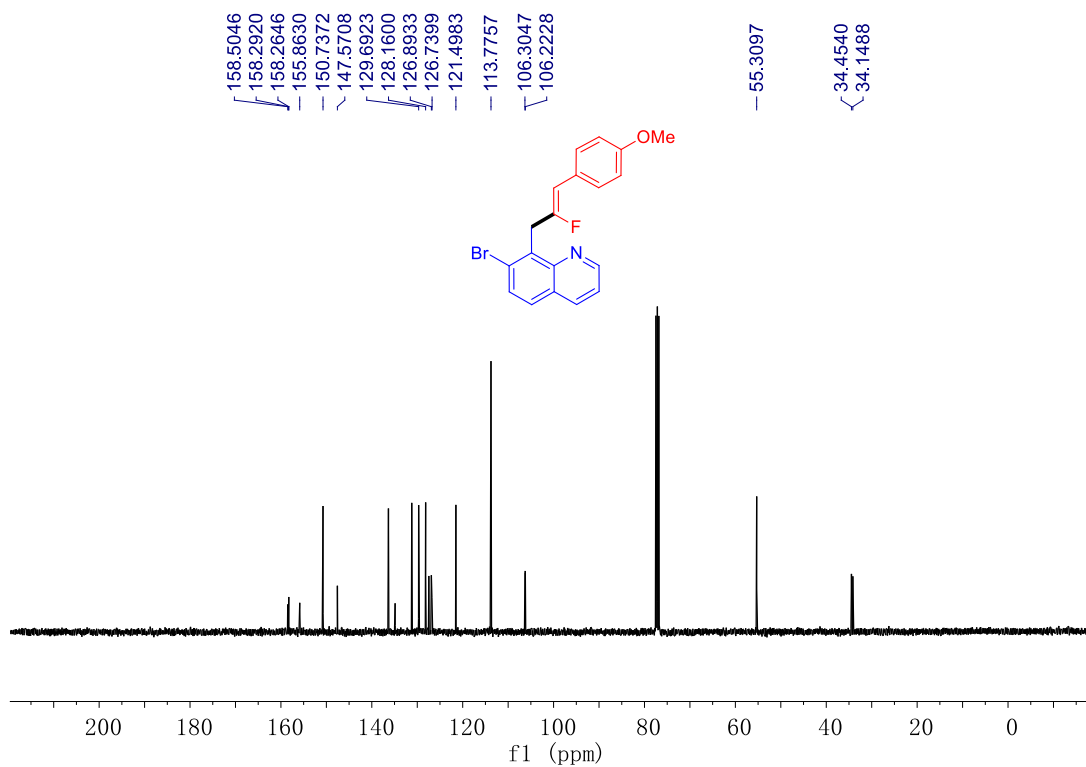

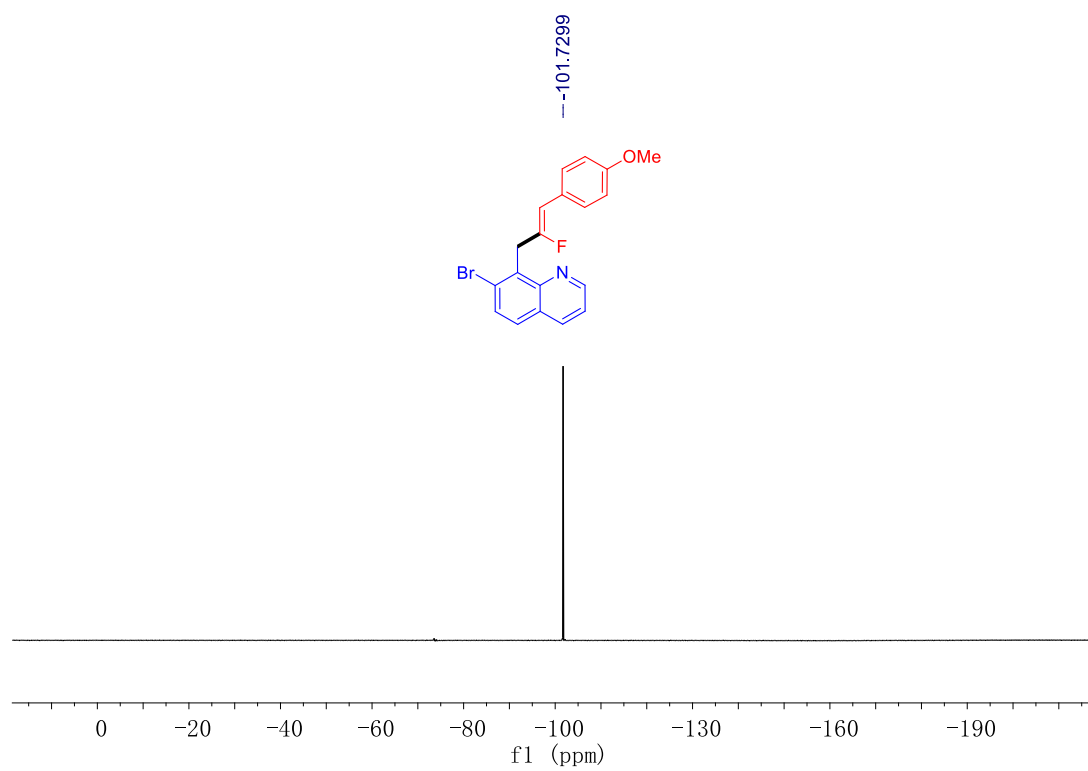

3oc

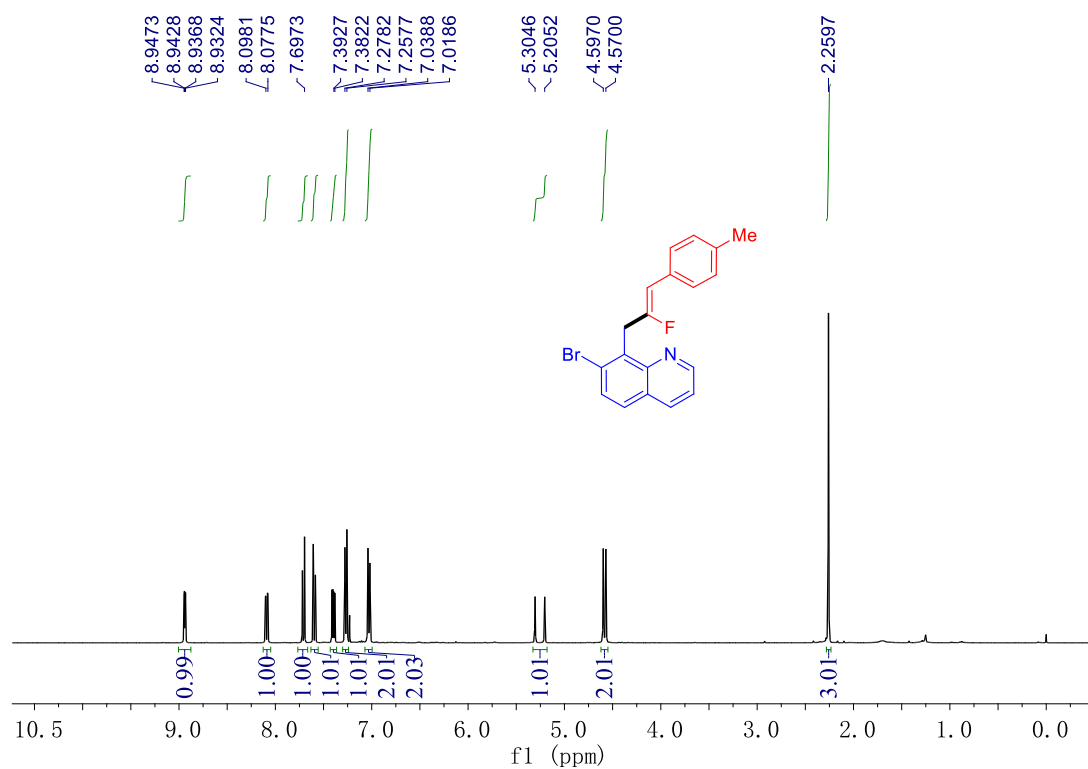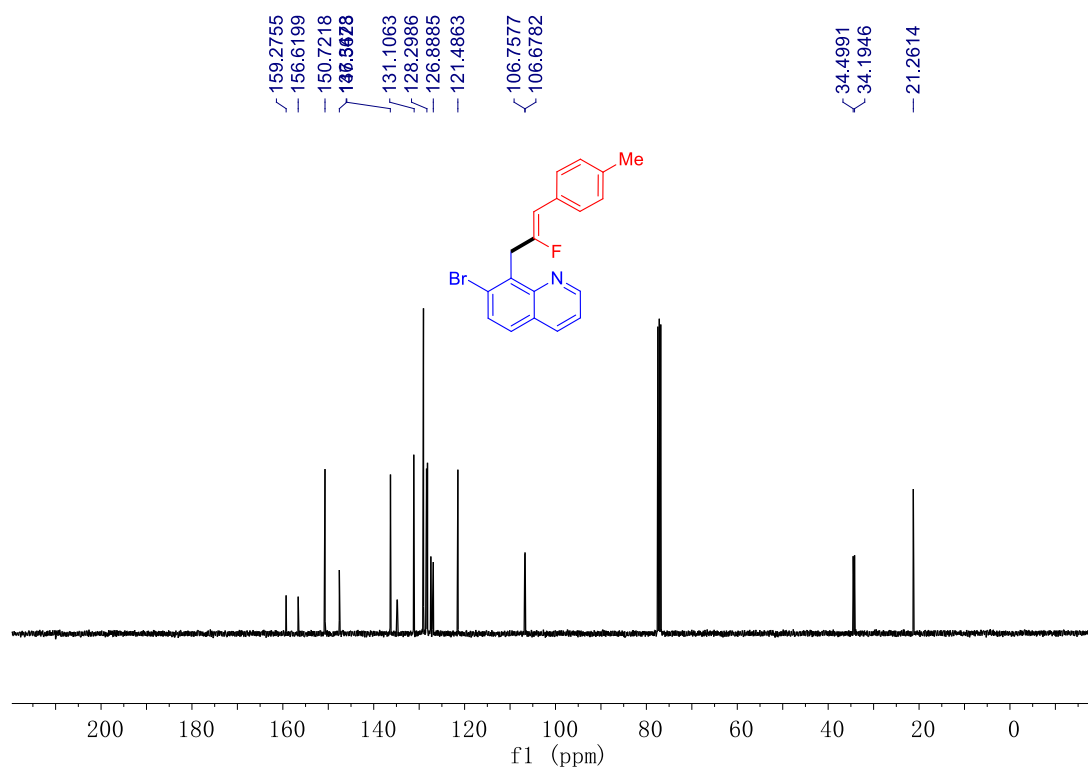



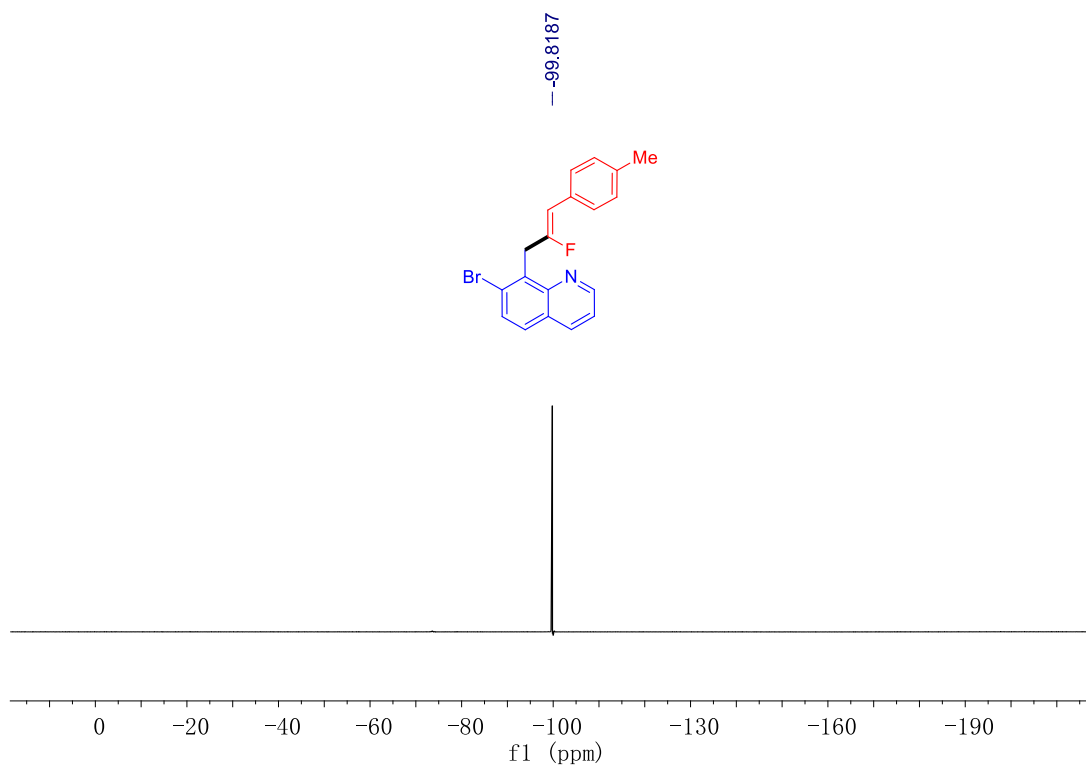

**3od**

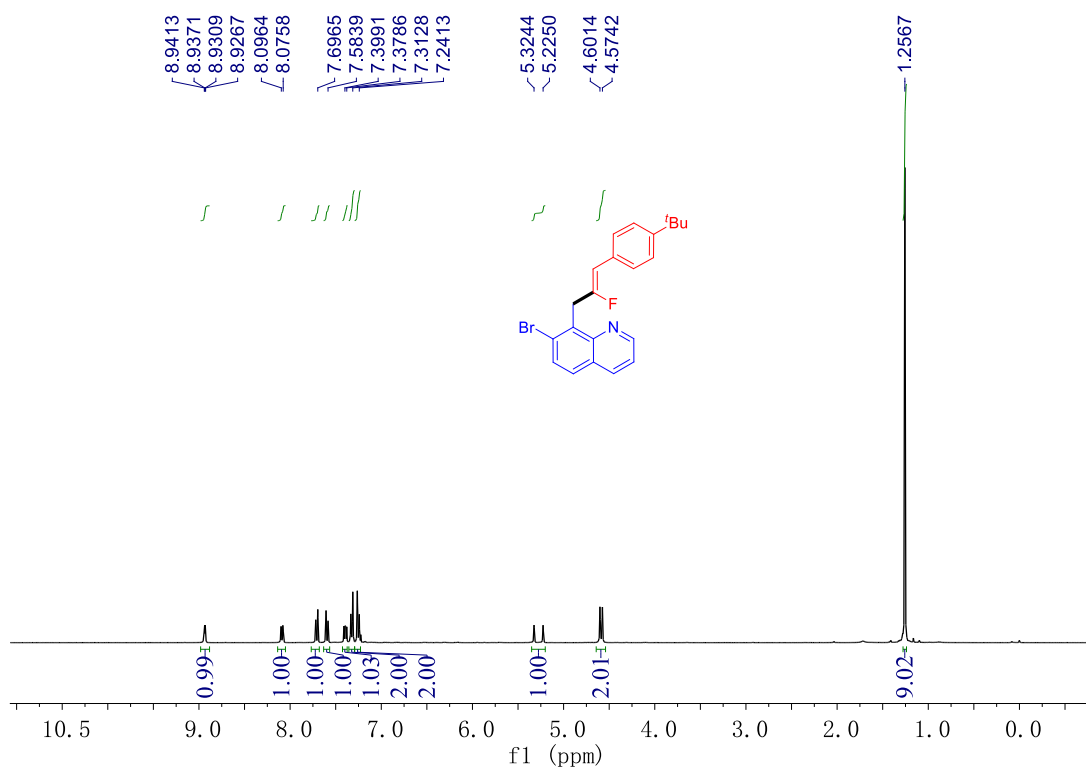

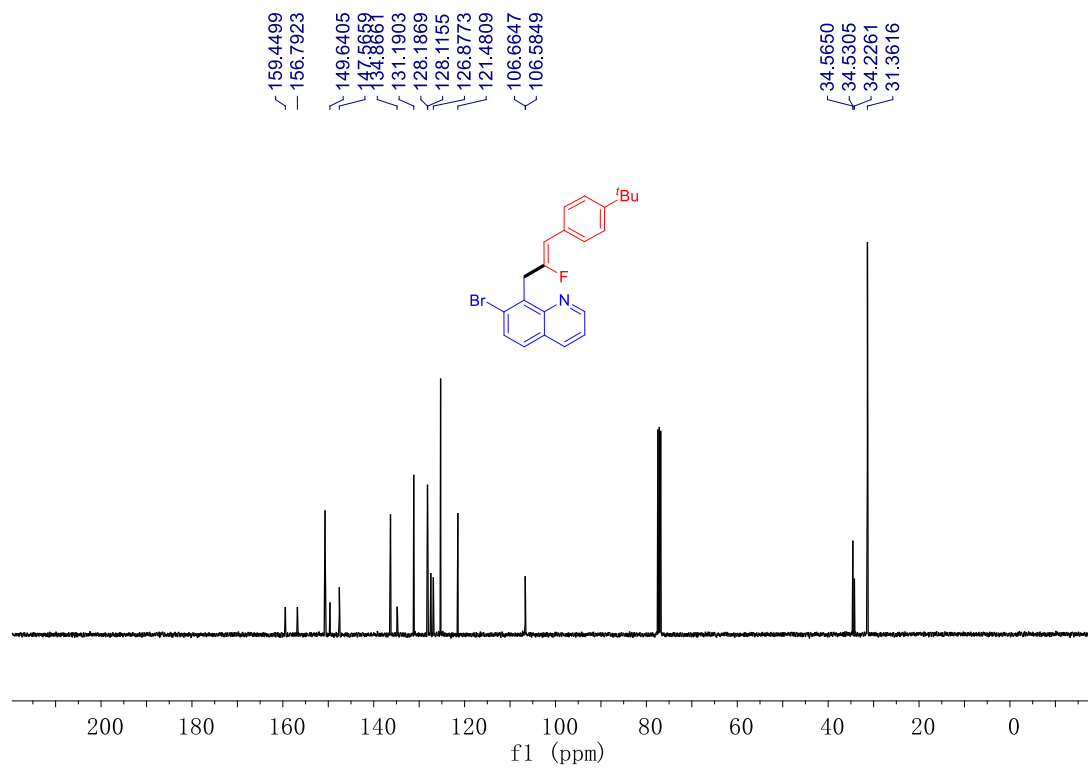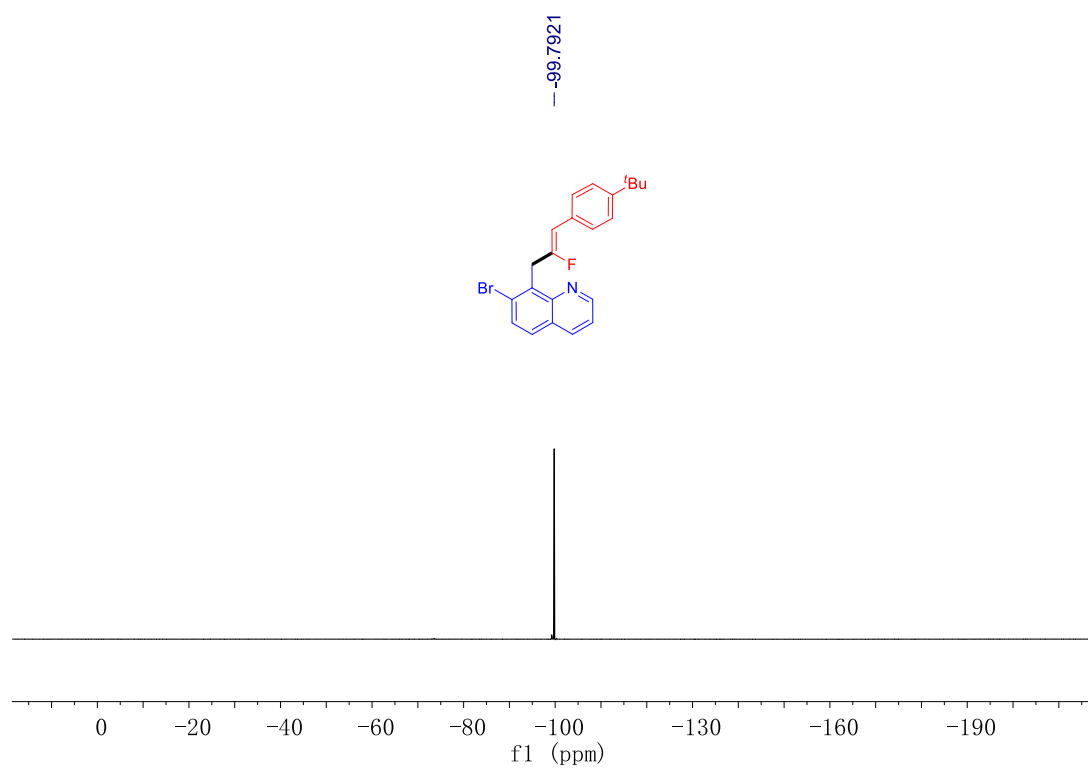

30e

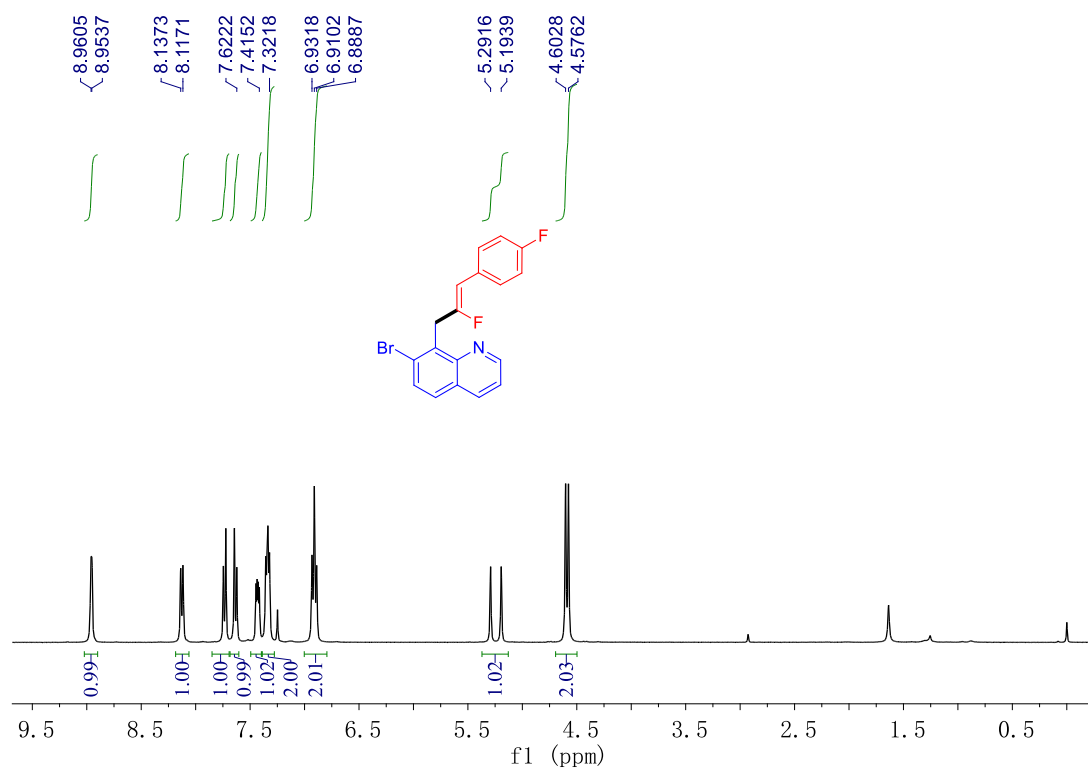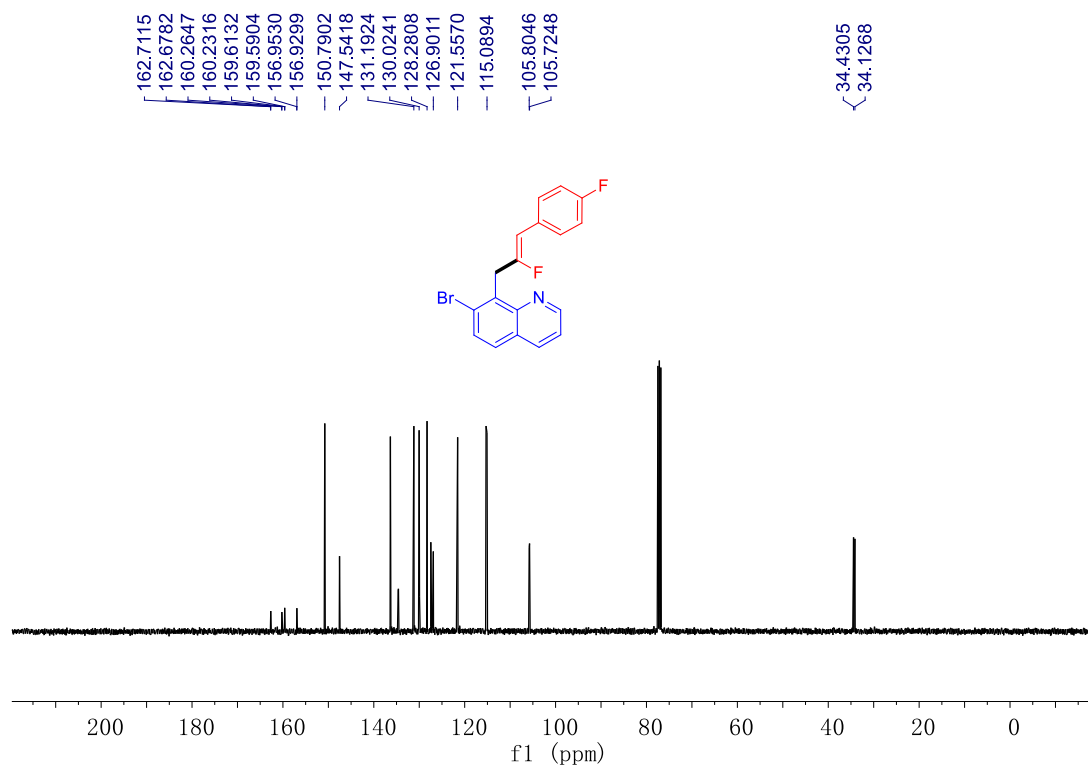

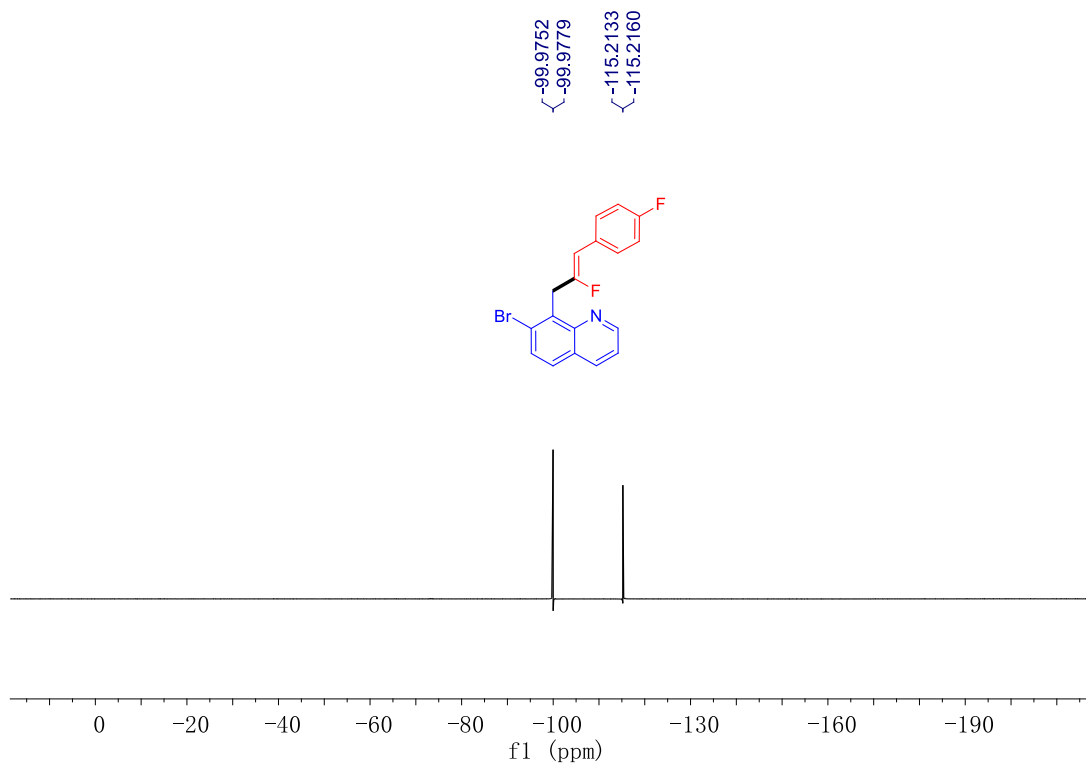

**3of**

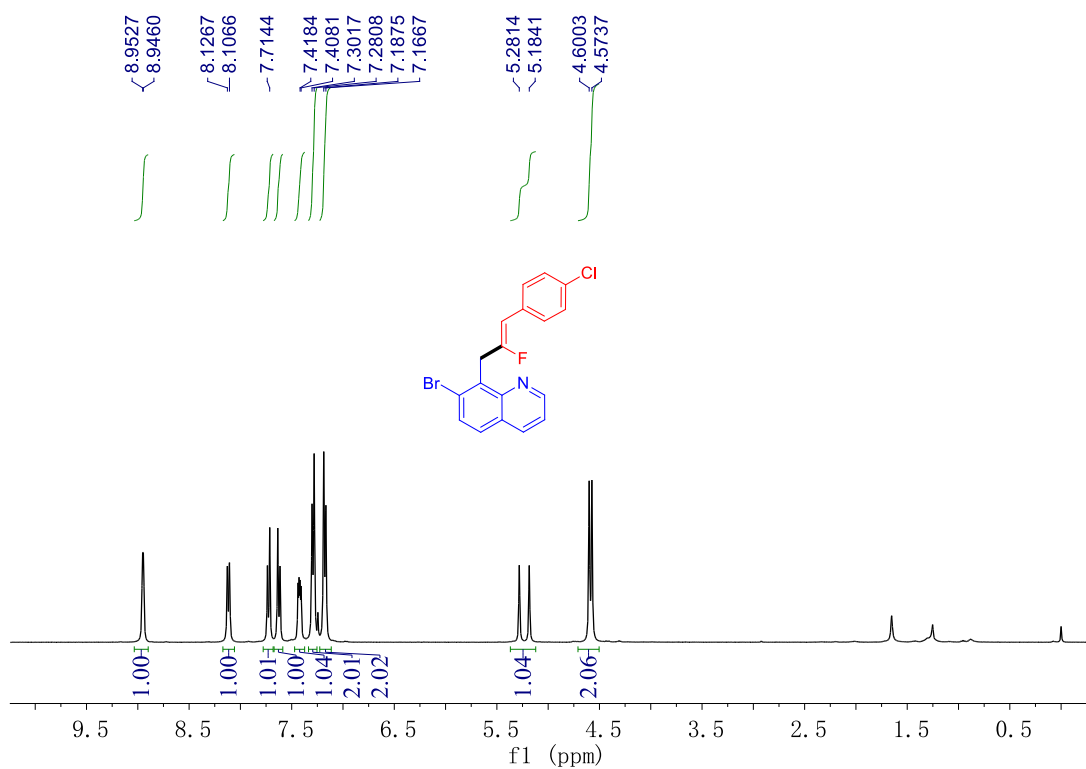

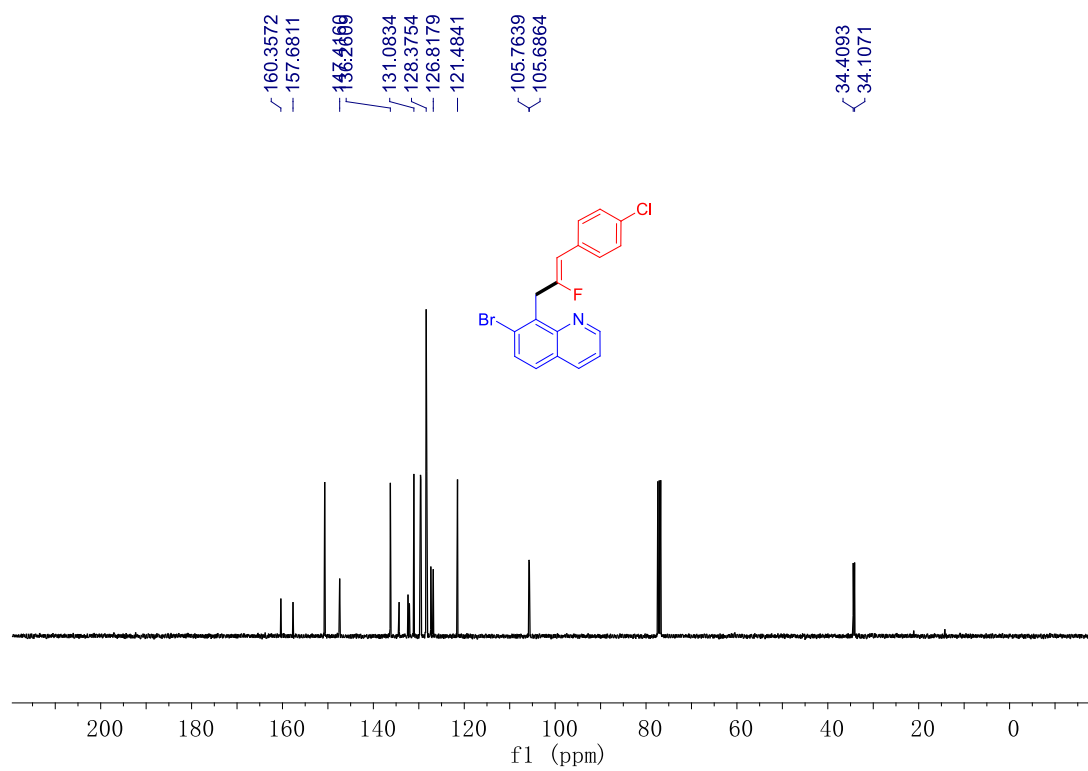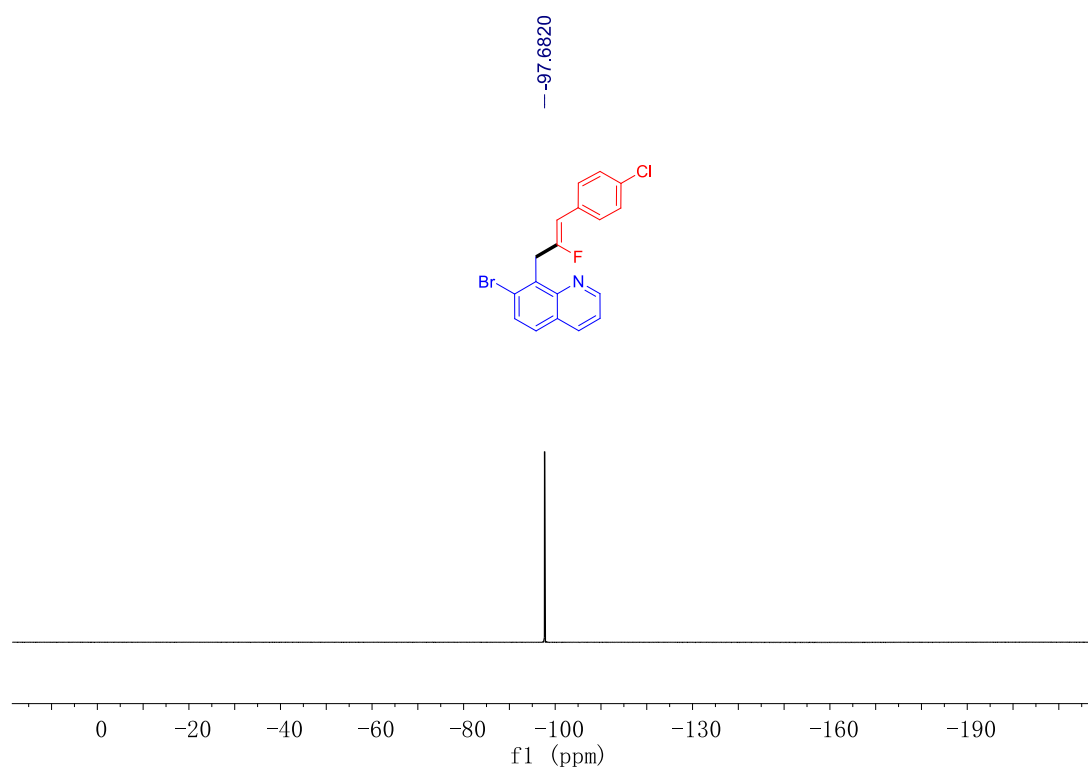

3ag

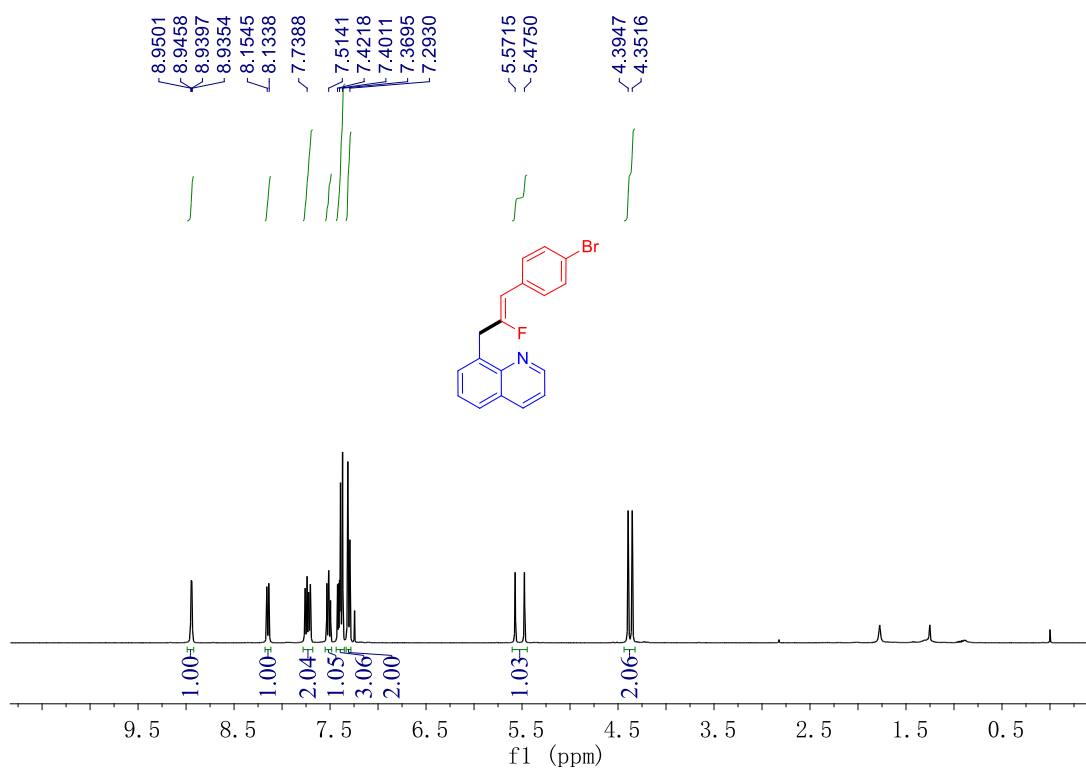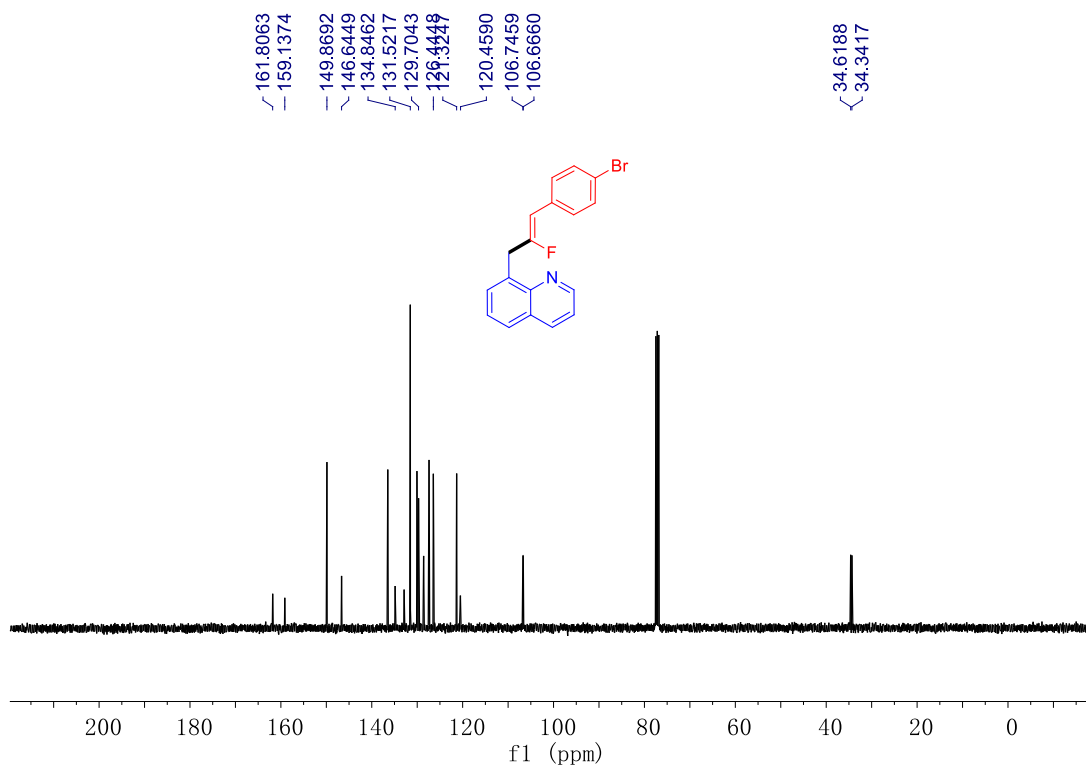

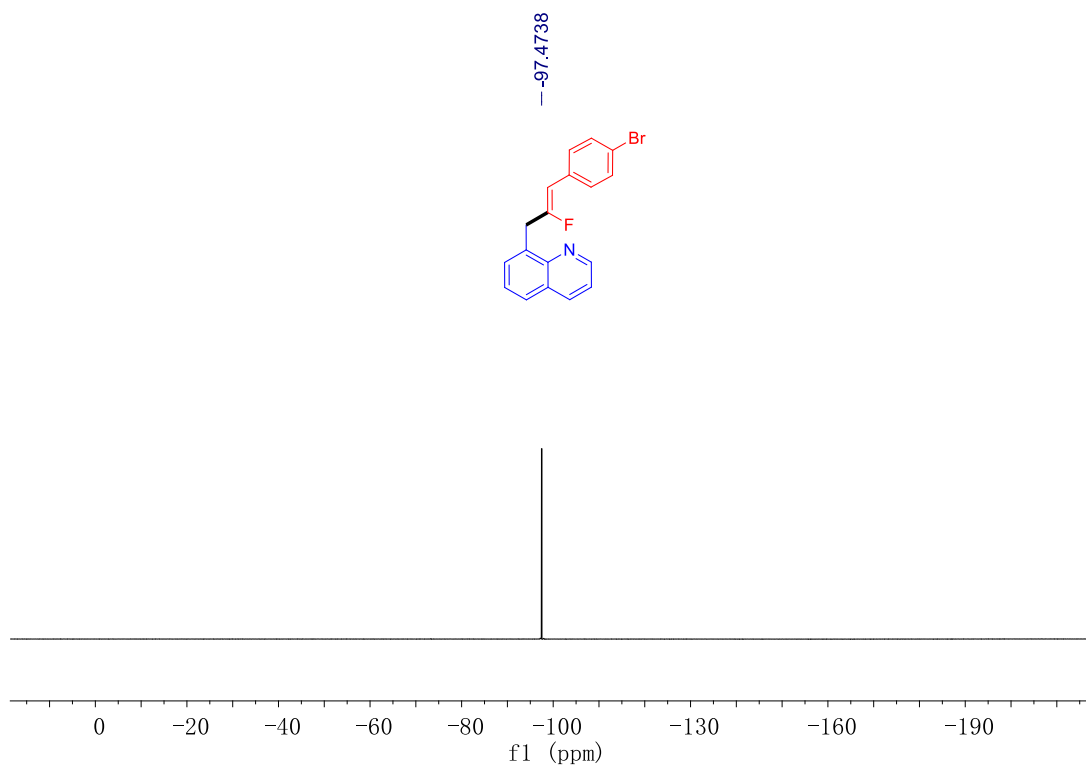

**3og**

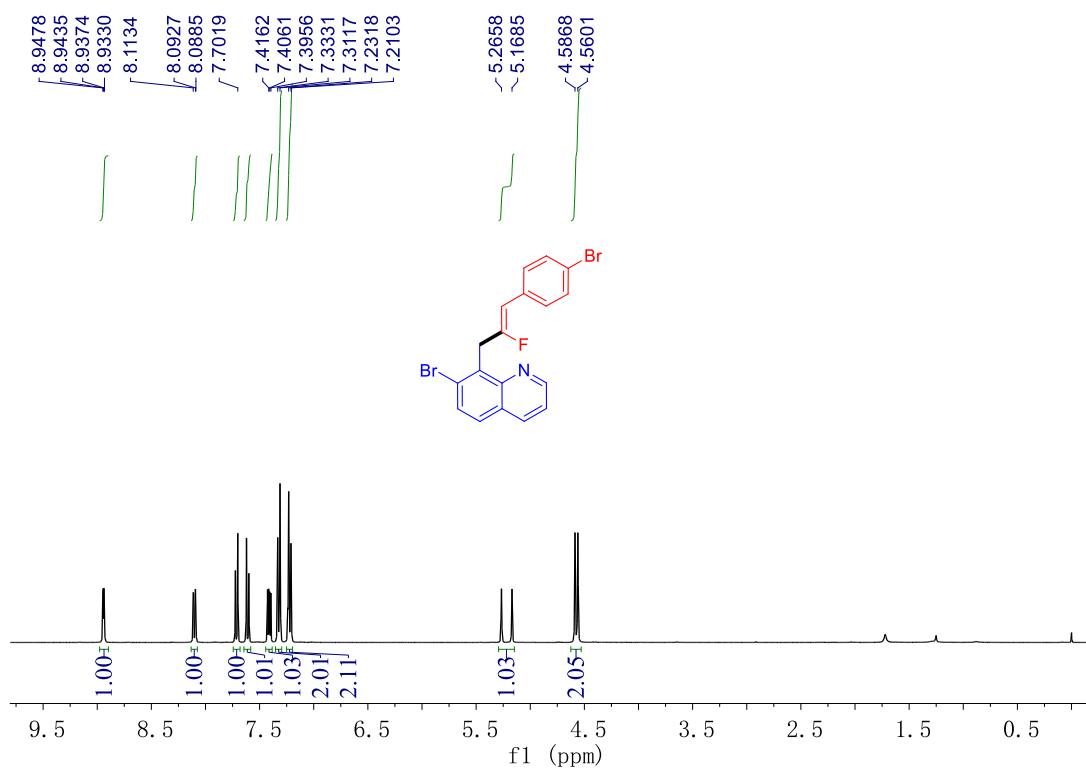

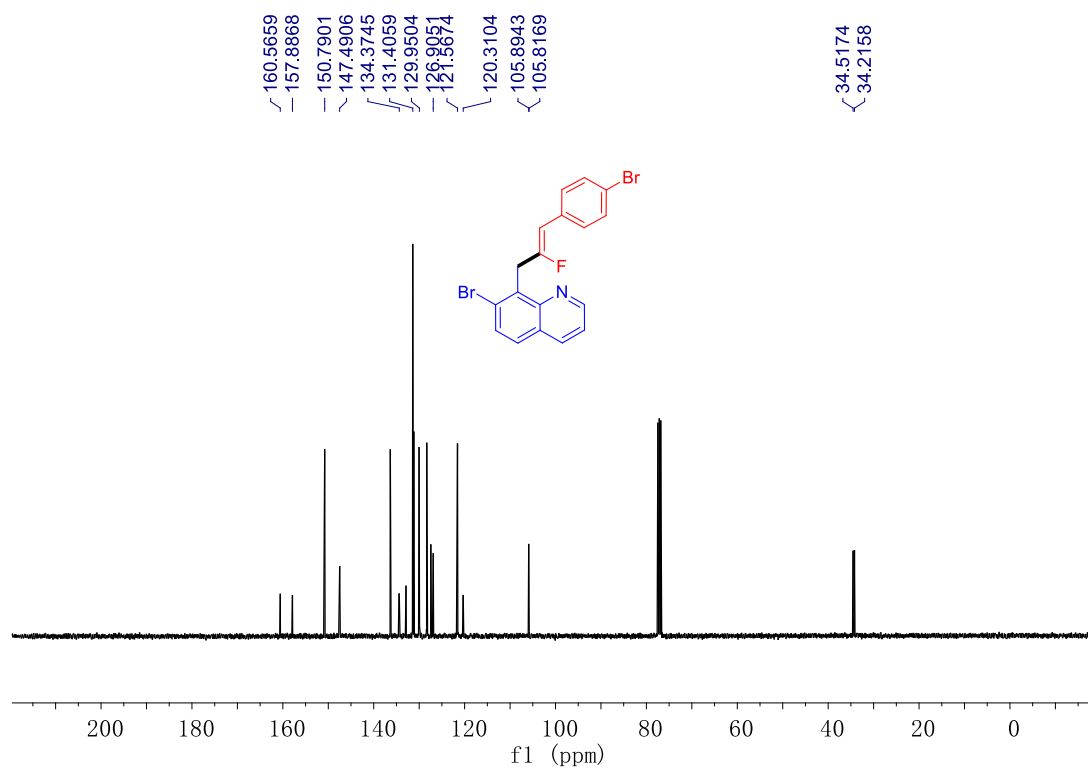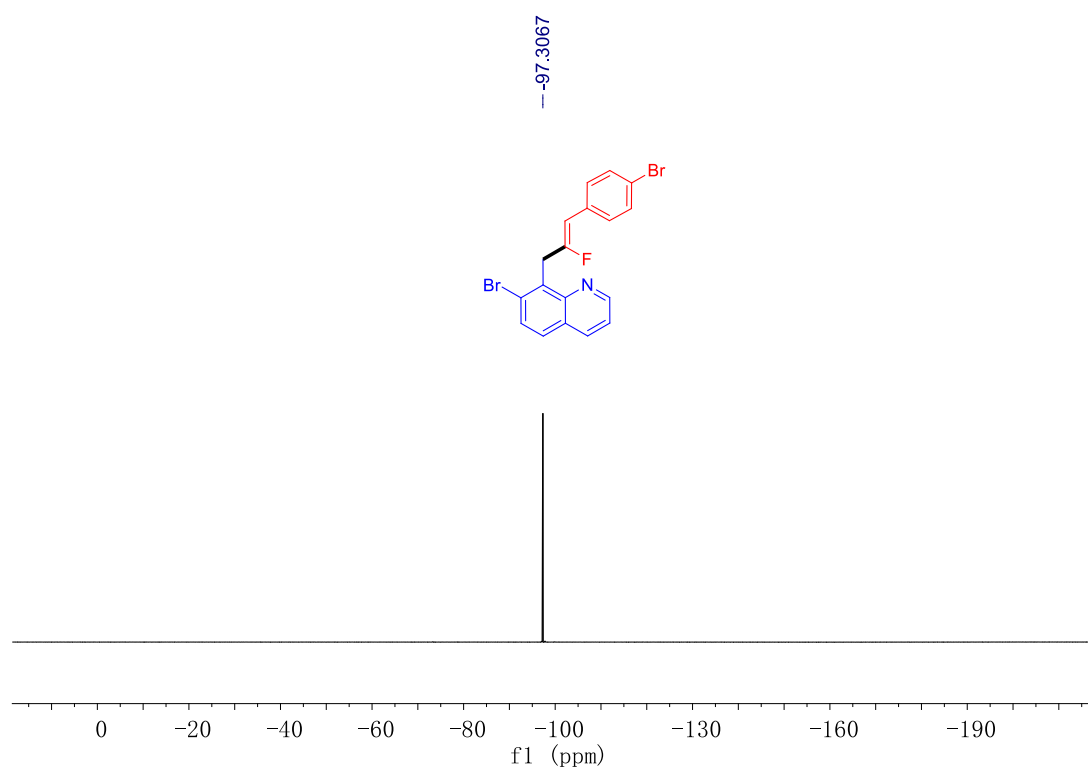



3ah

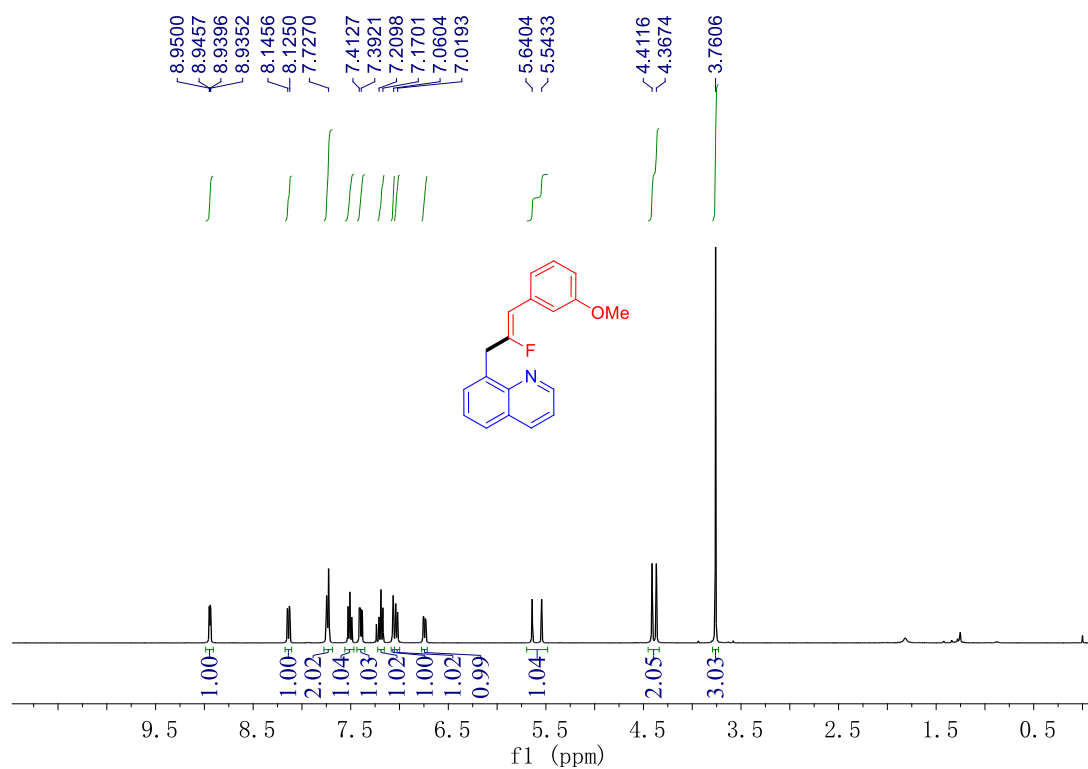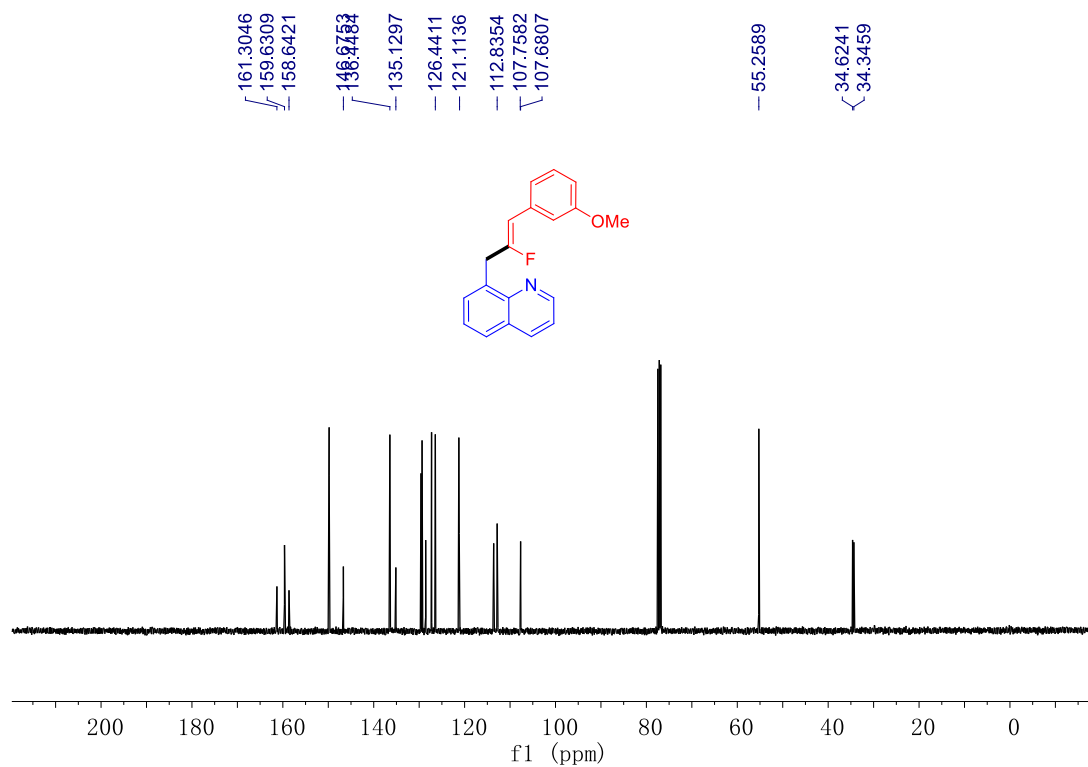

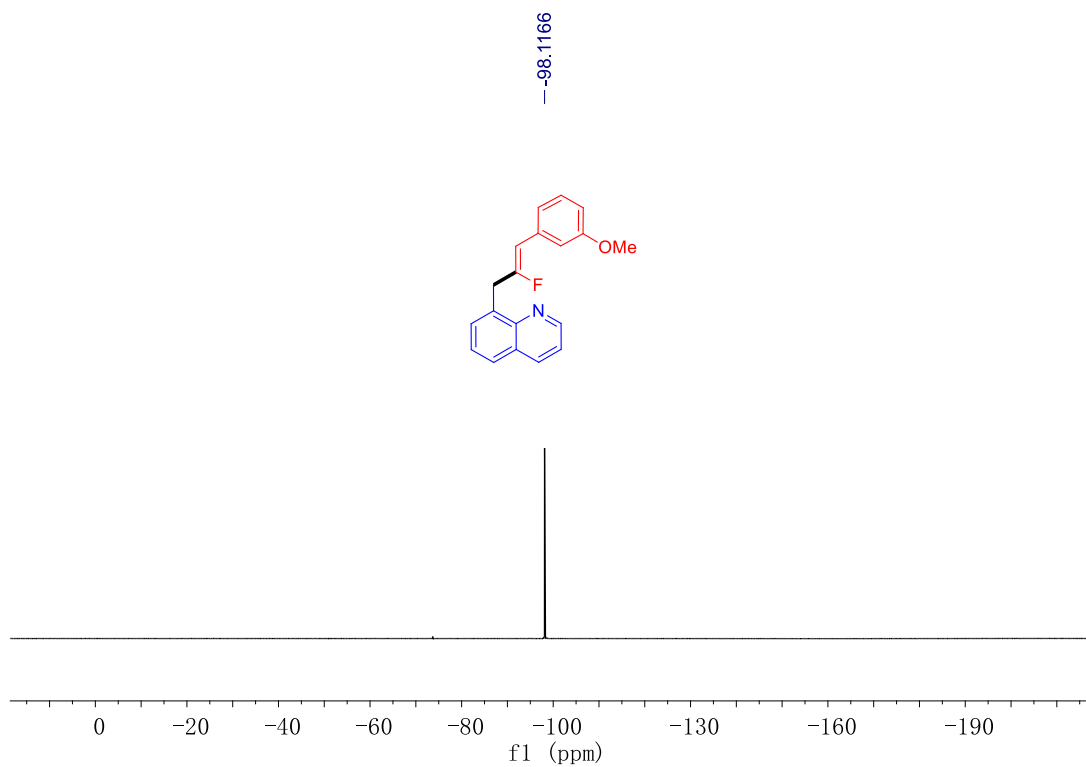

### 3oh

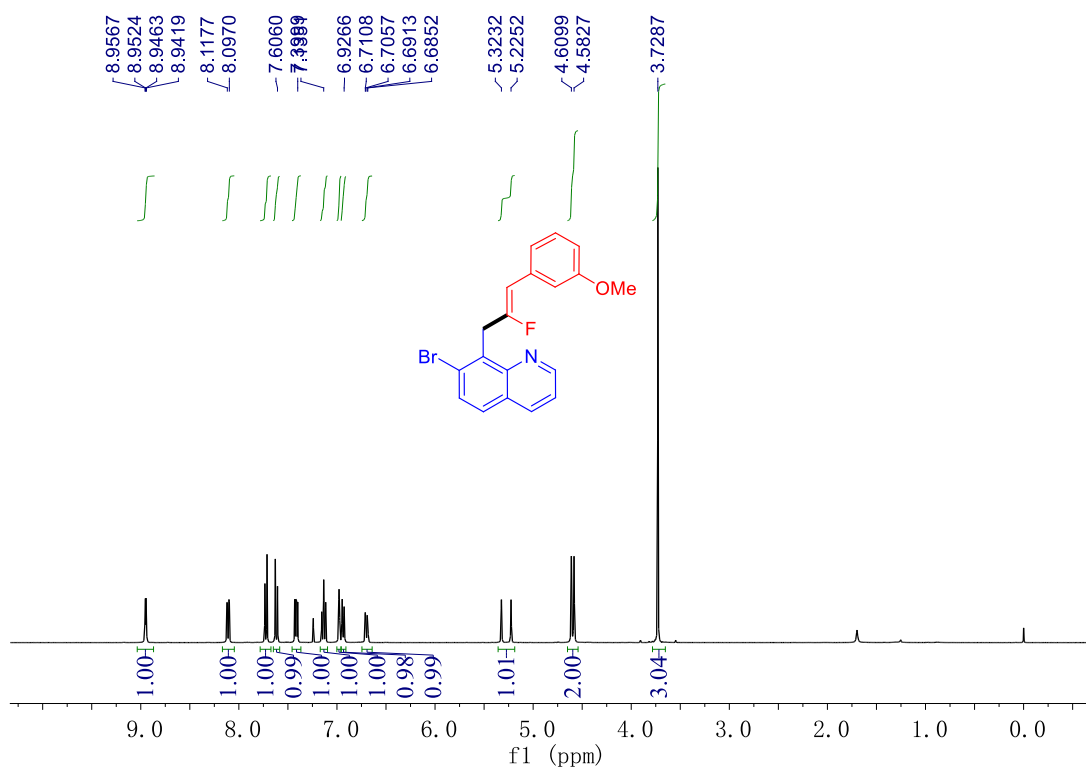

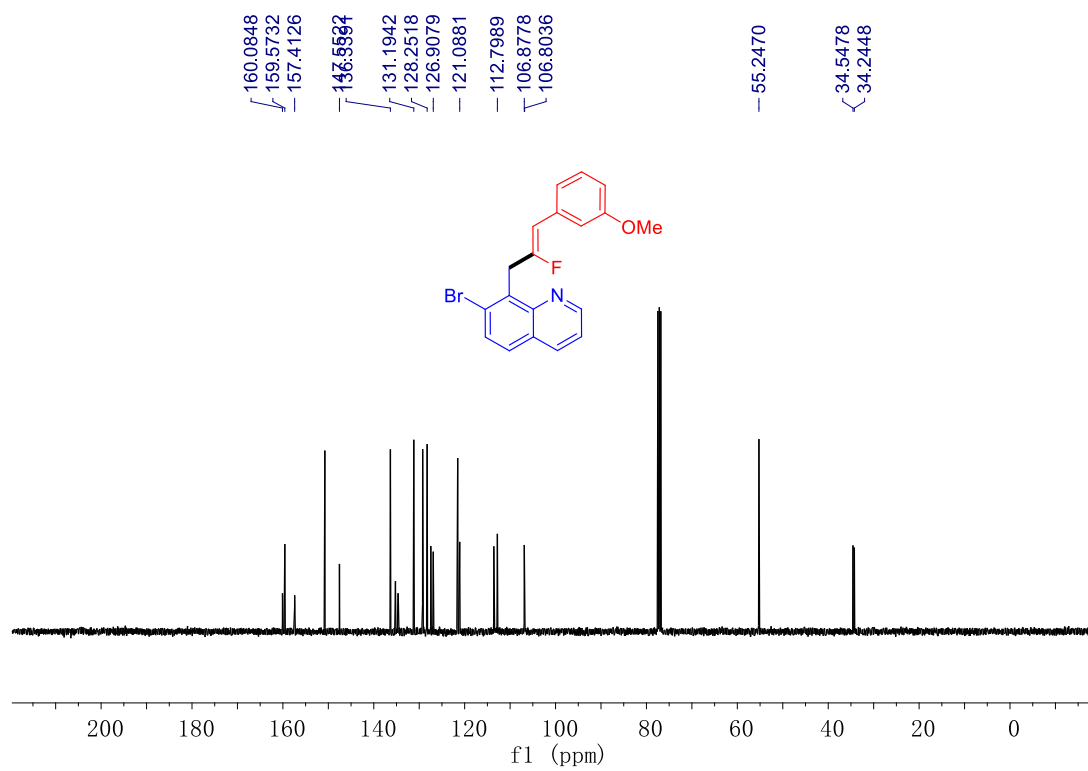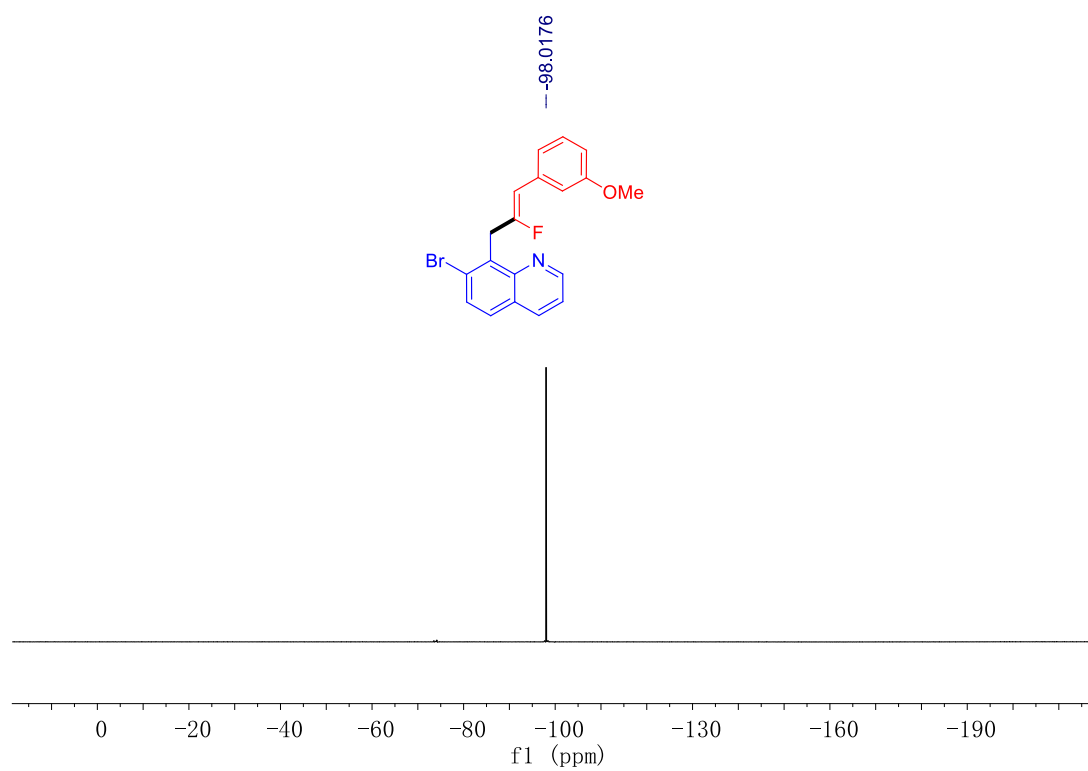

3oi

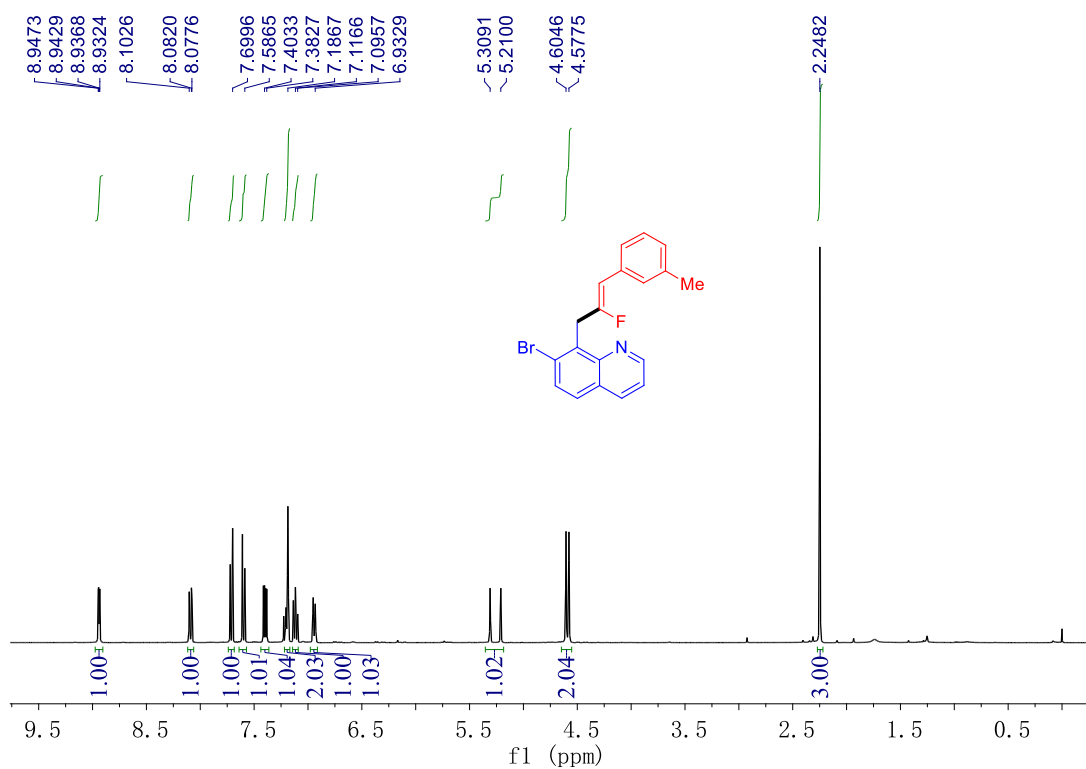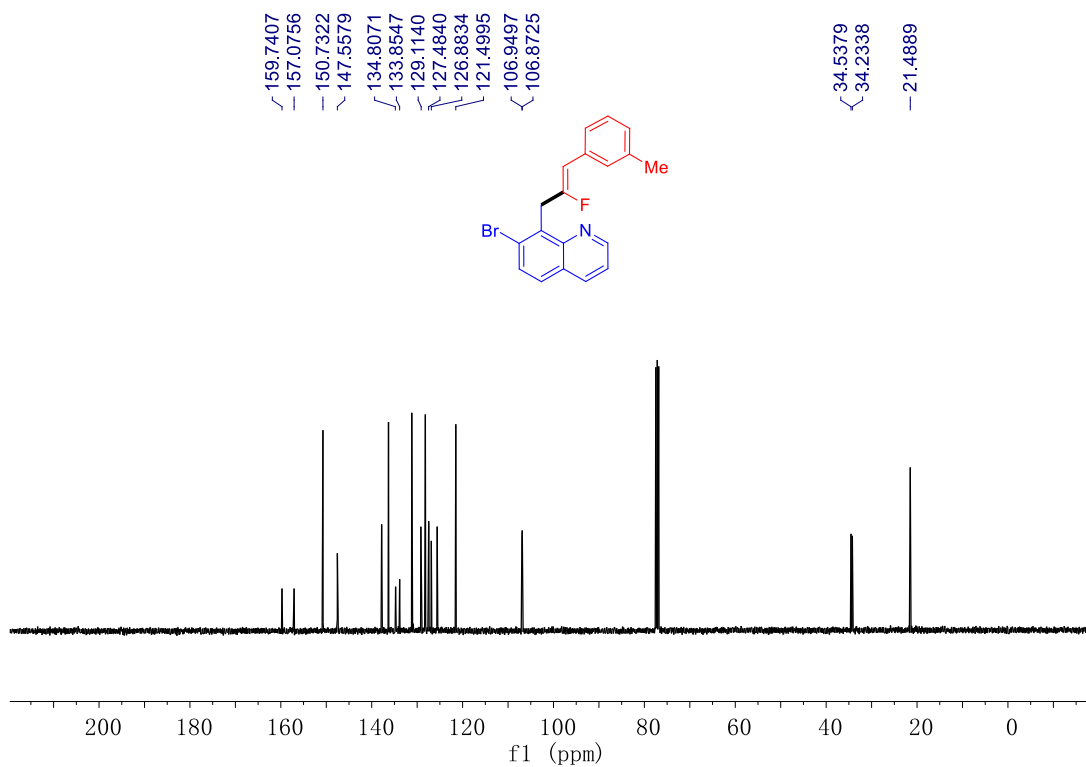

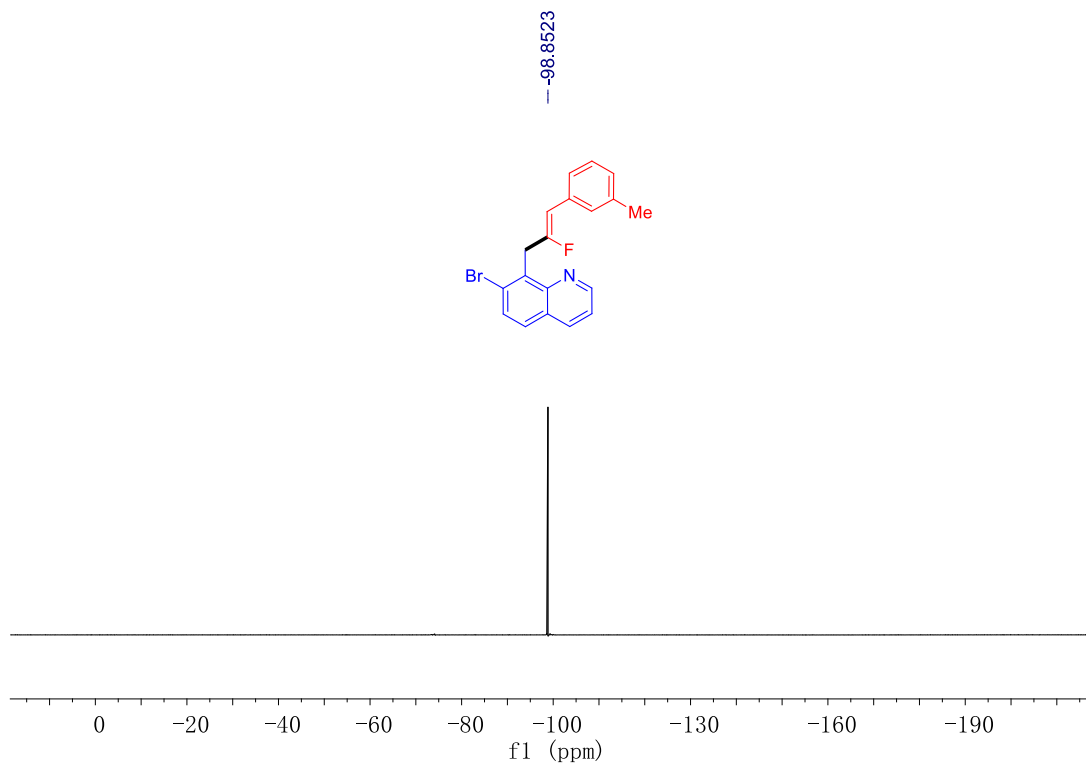

3oj

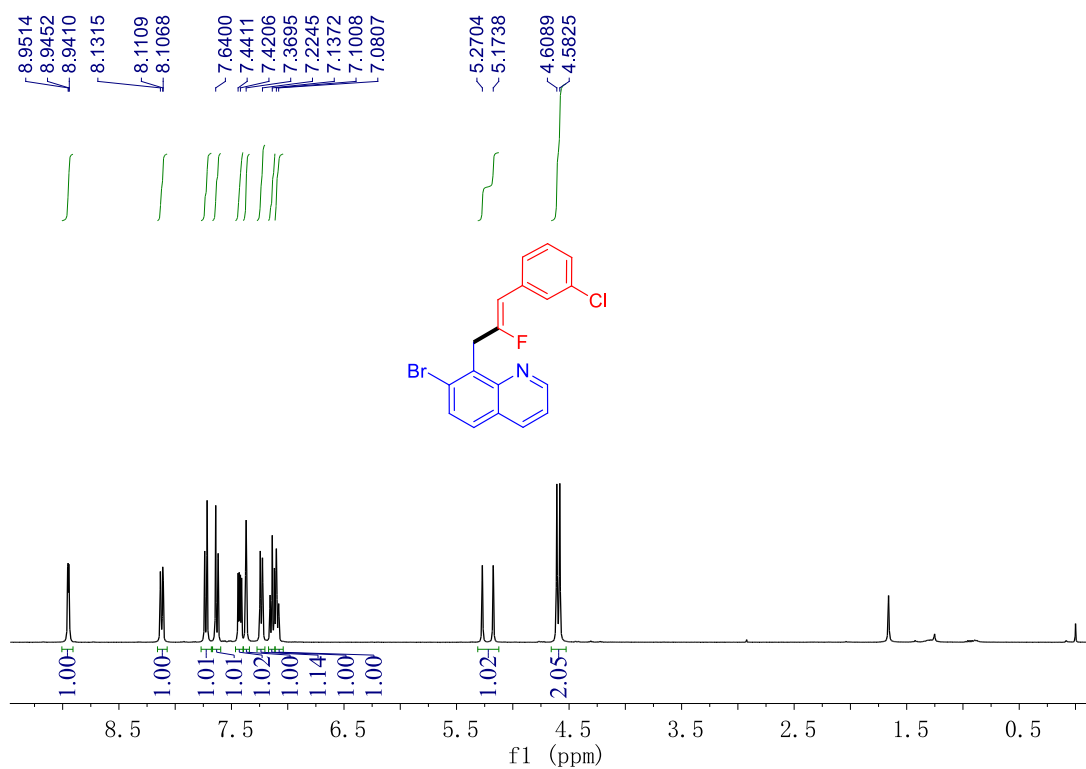

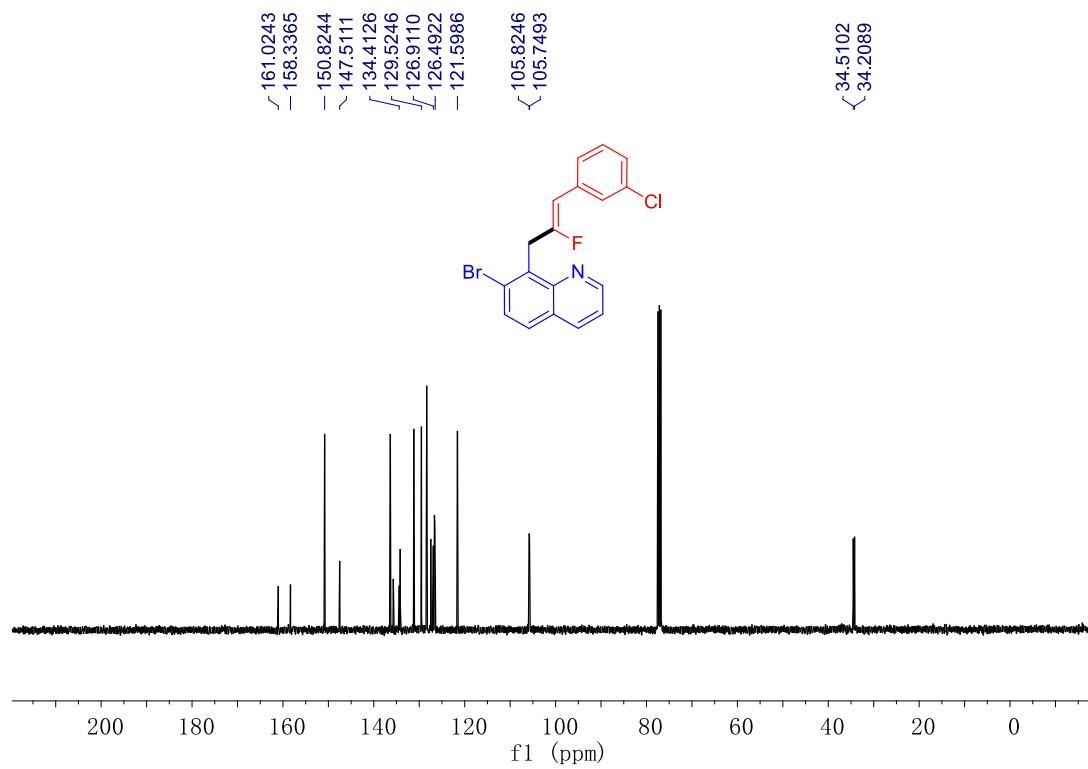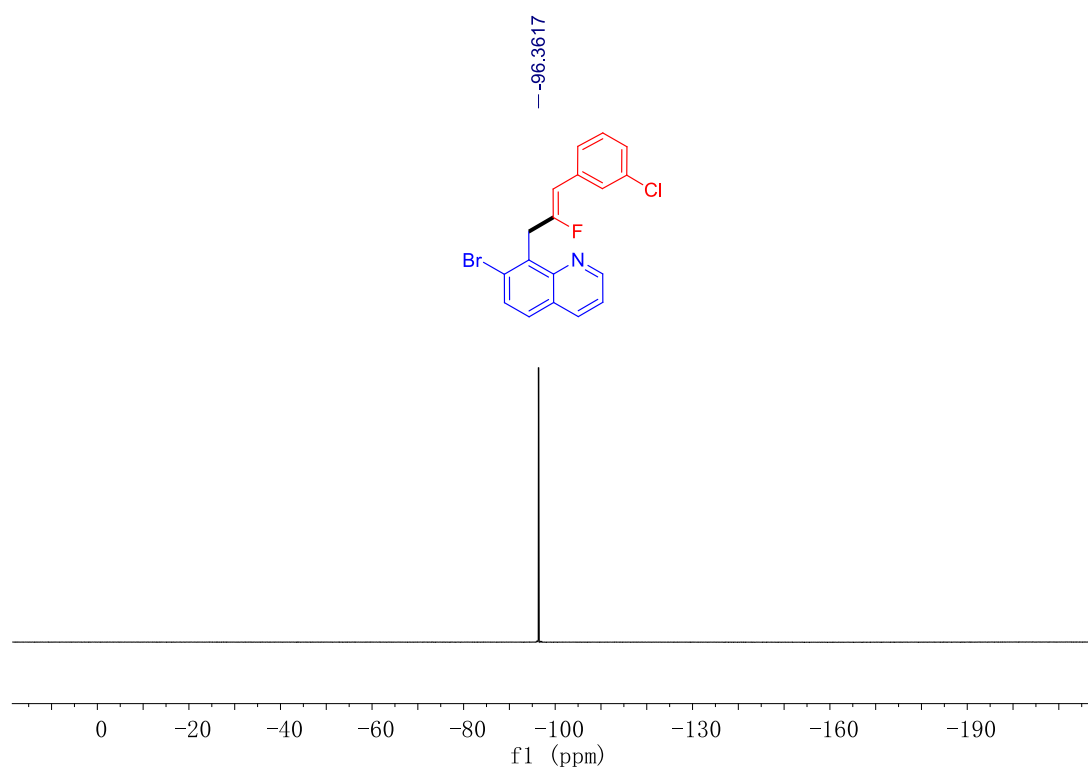

3ak

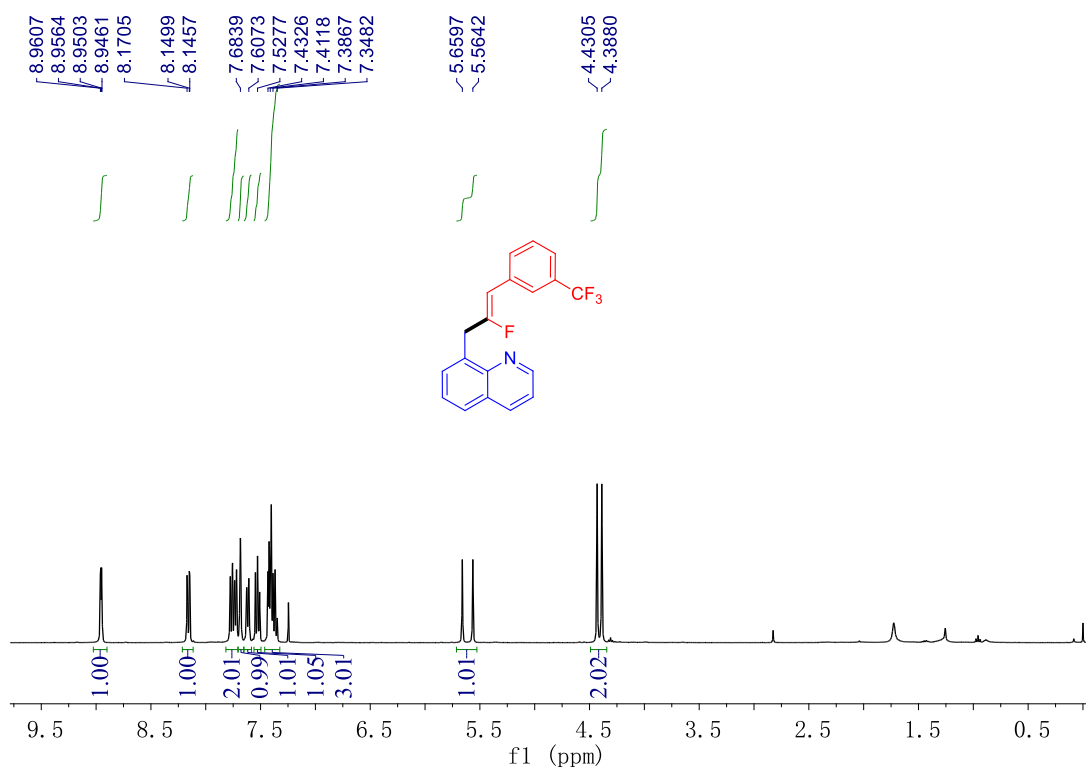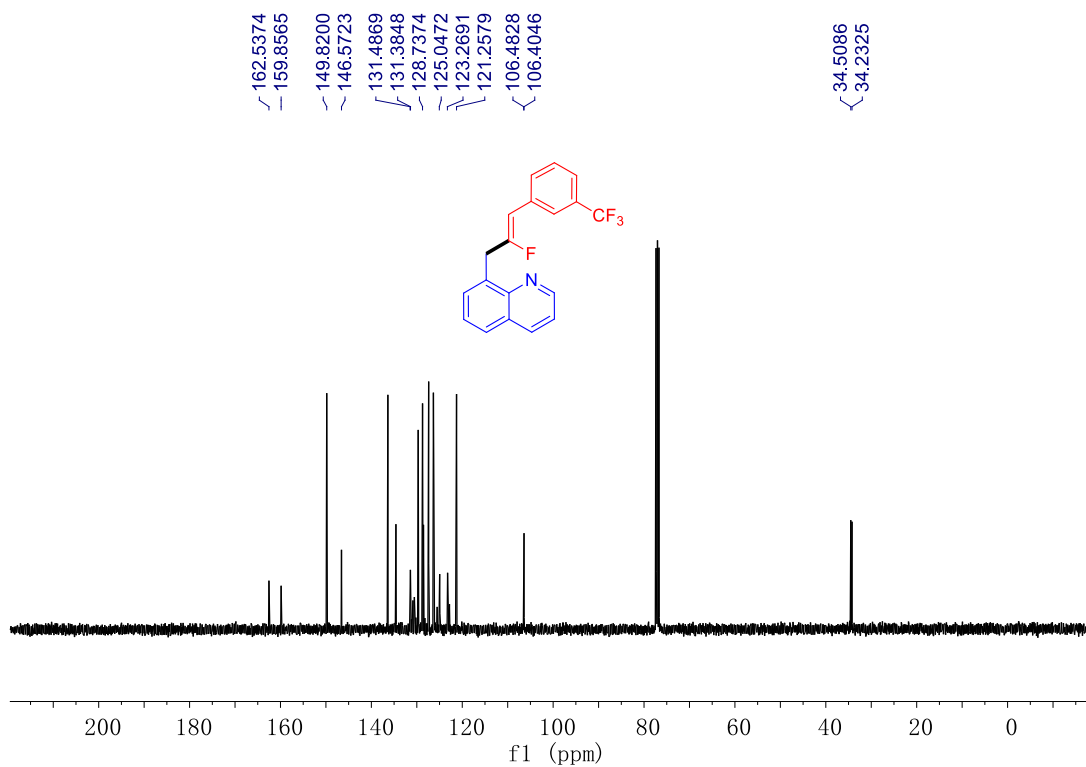

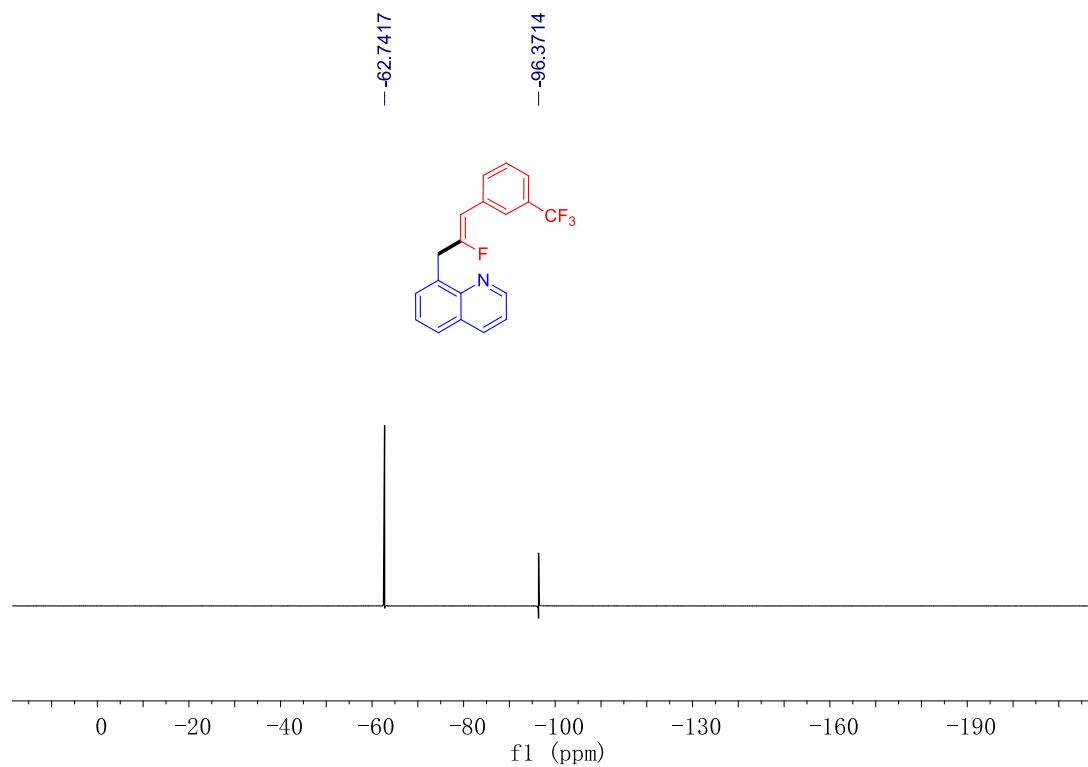

**3al**

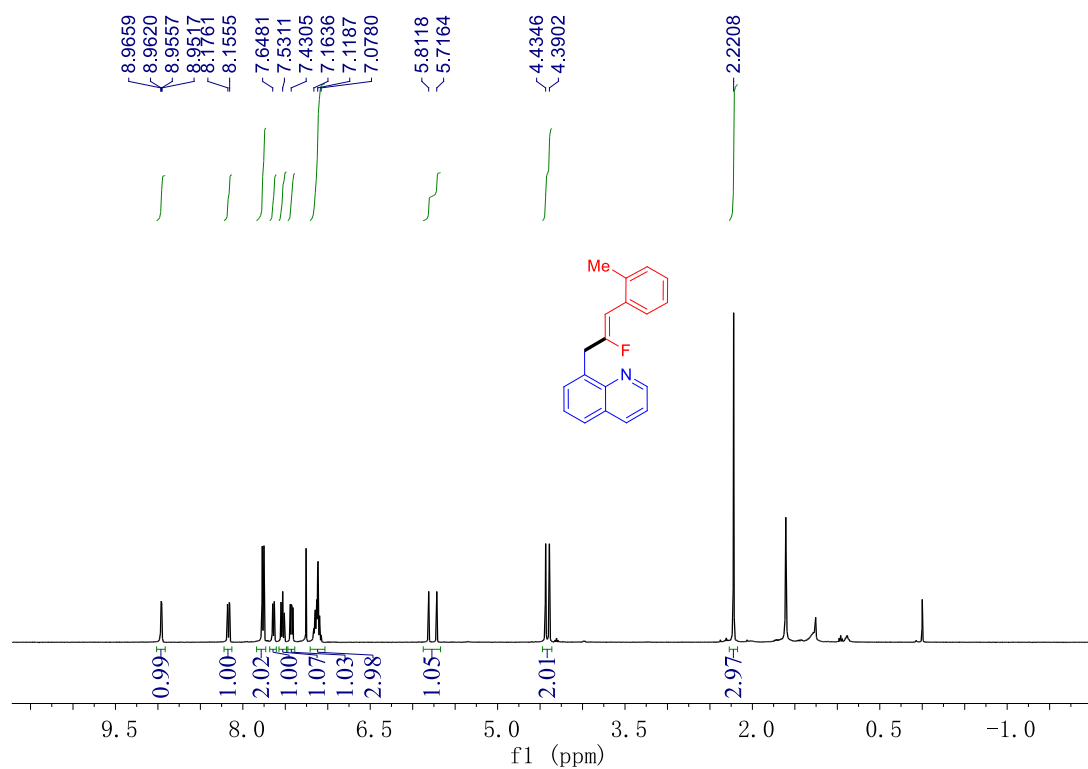



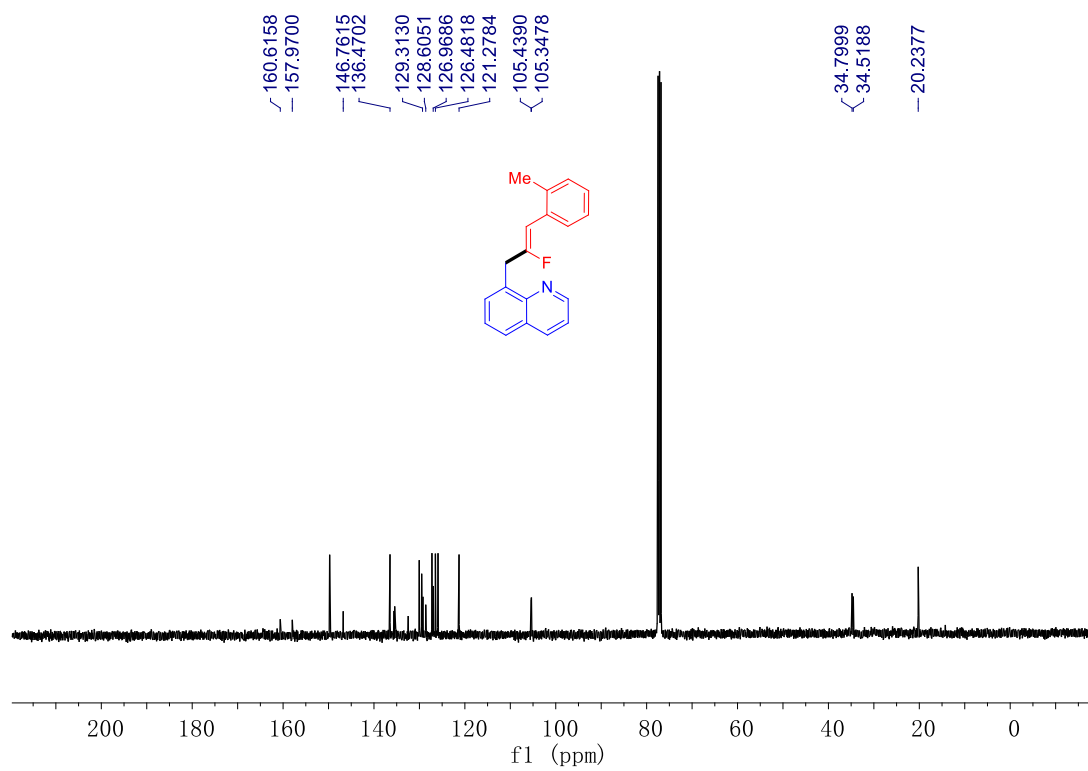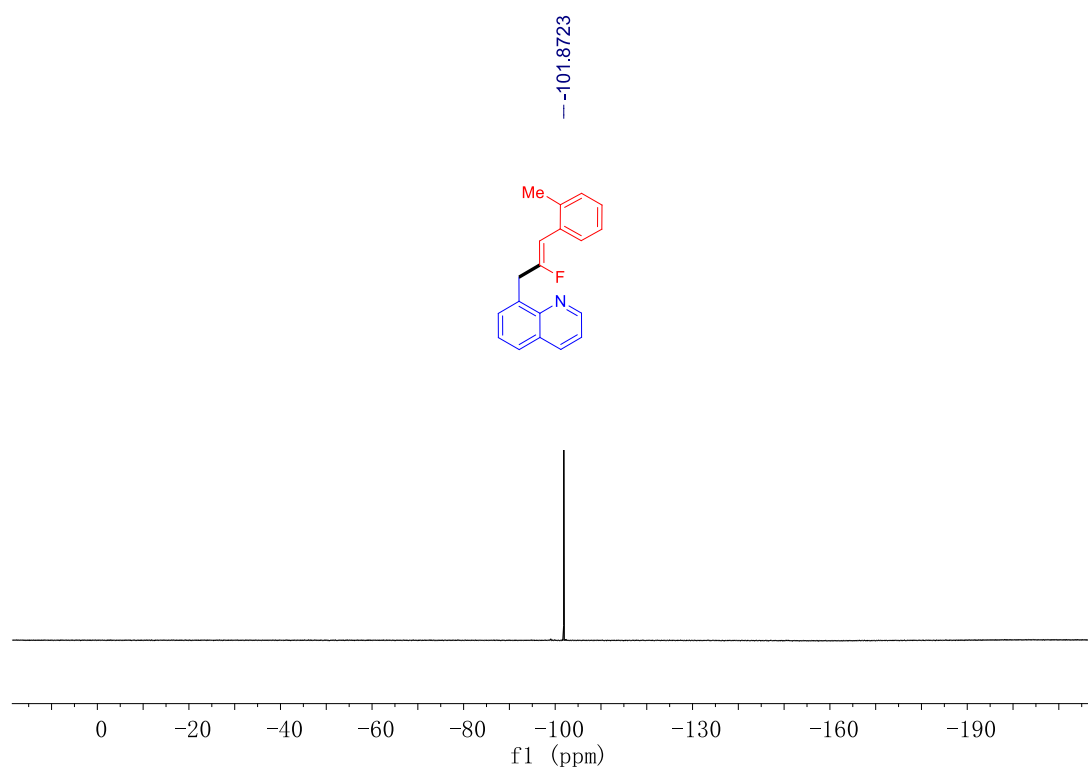

3om

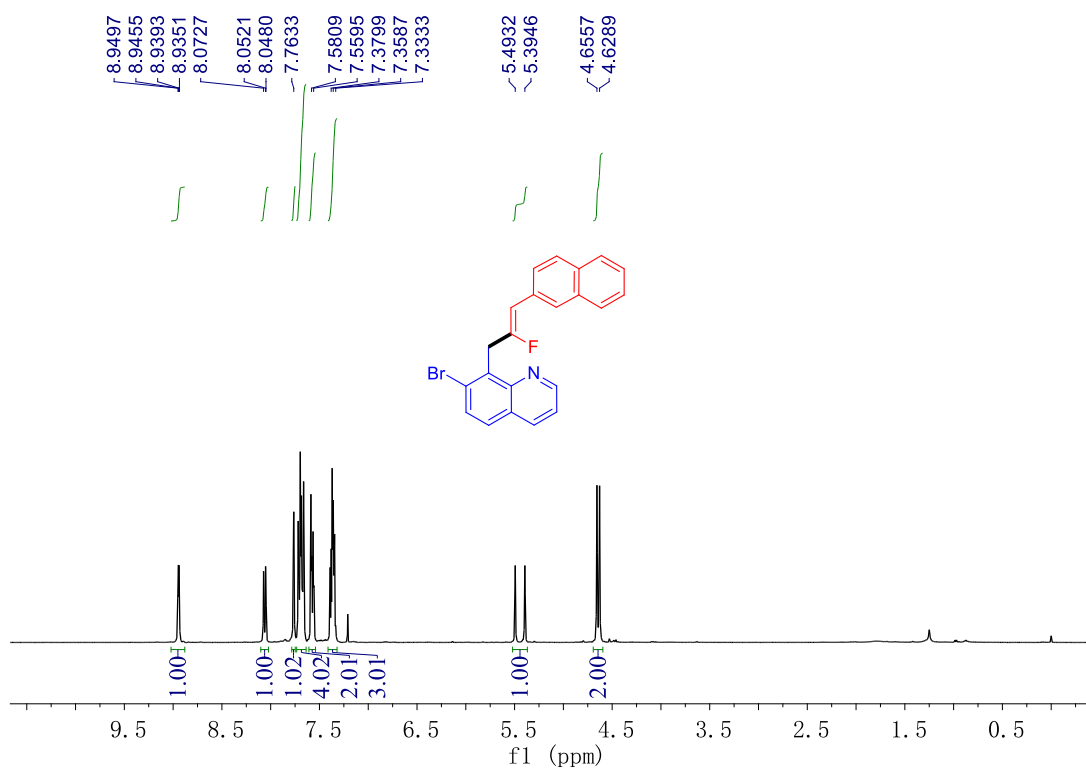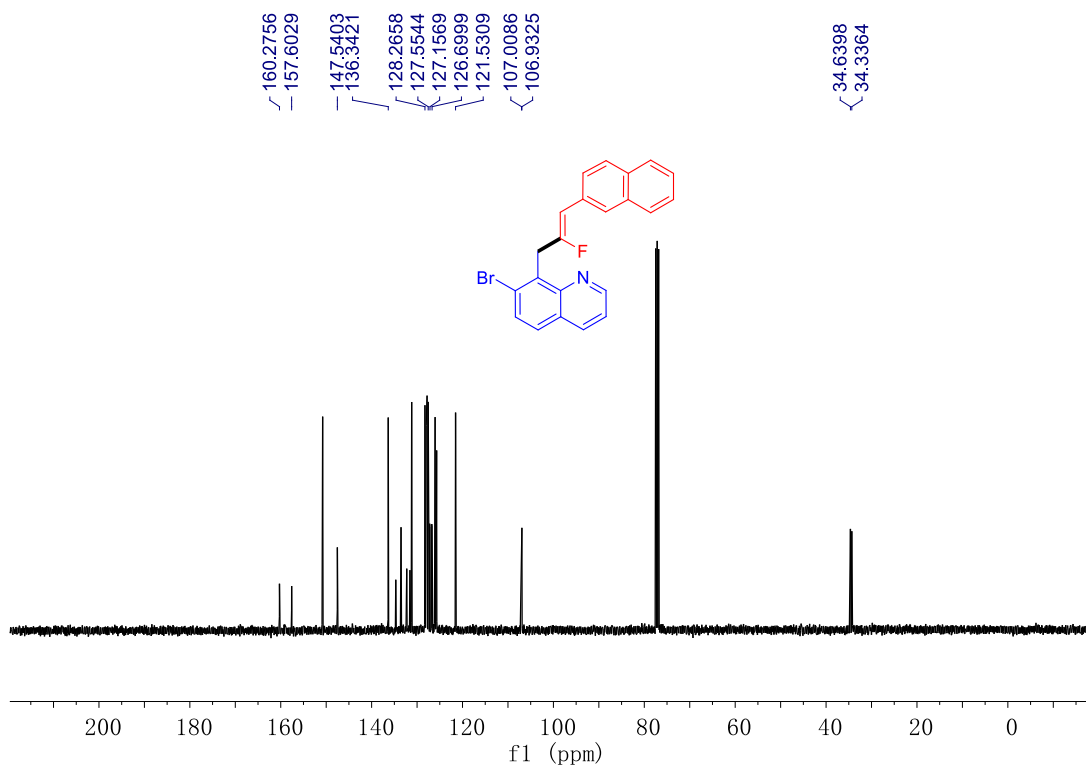

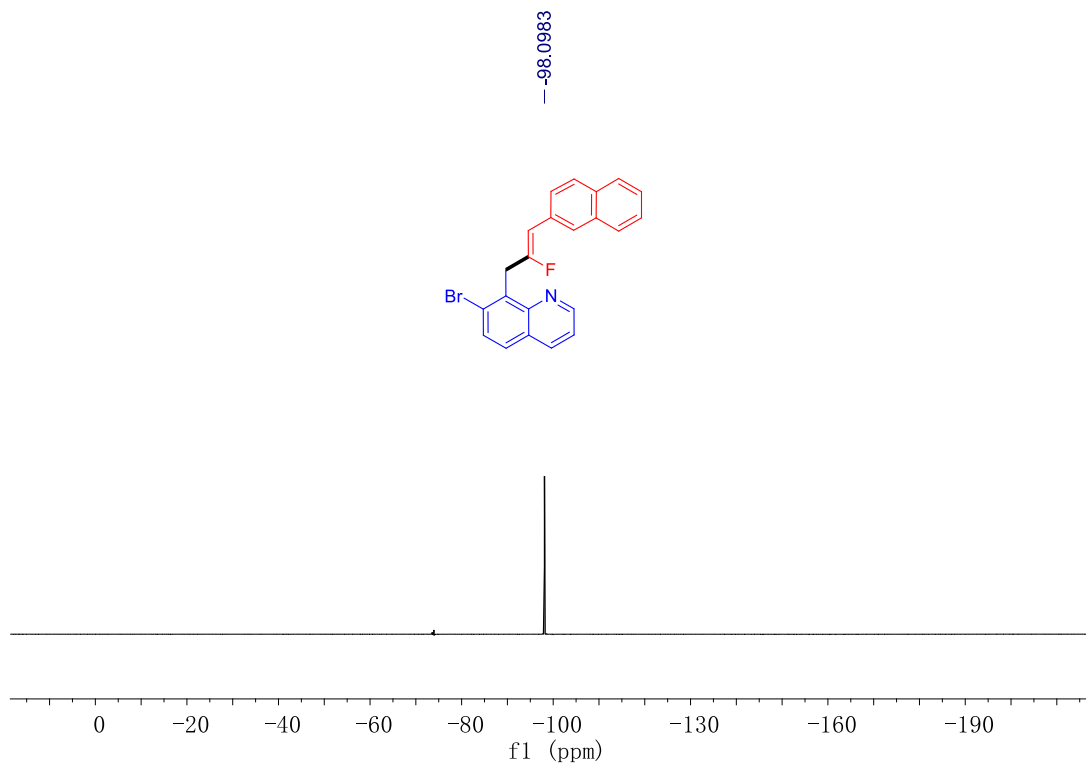

3on

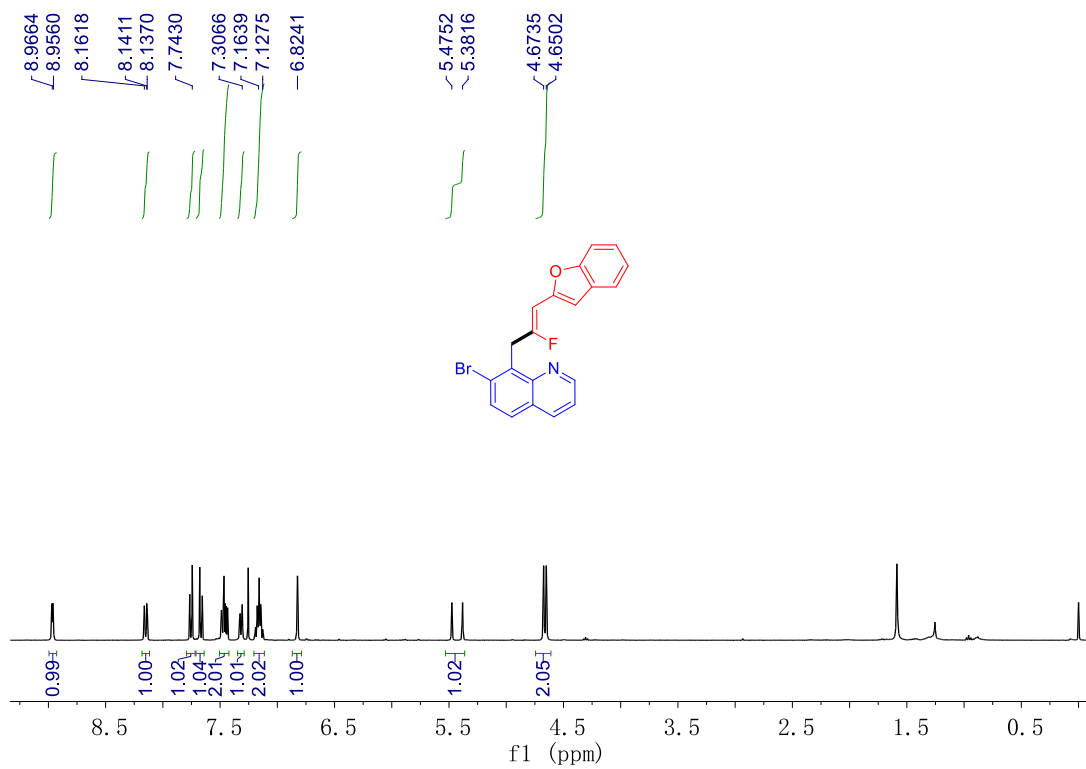

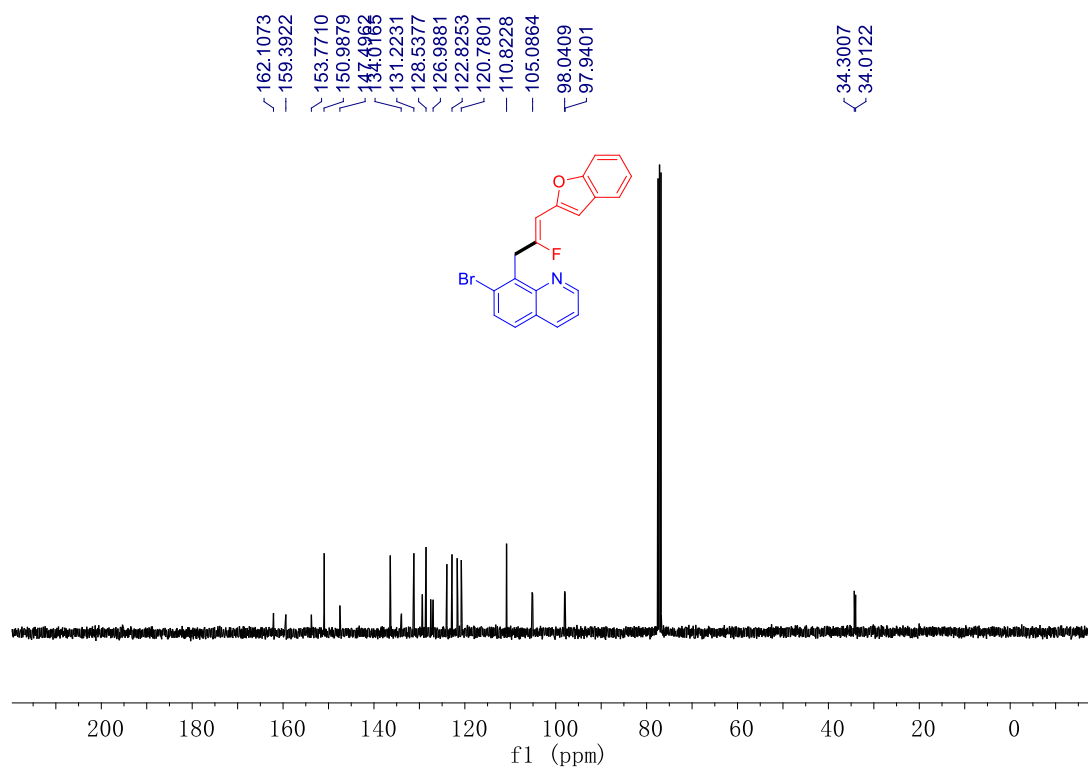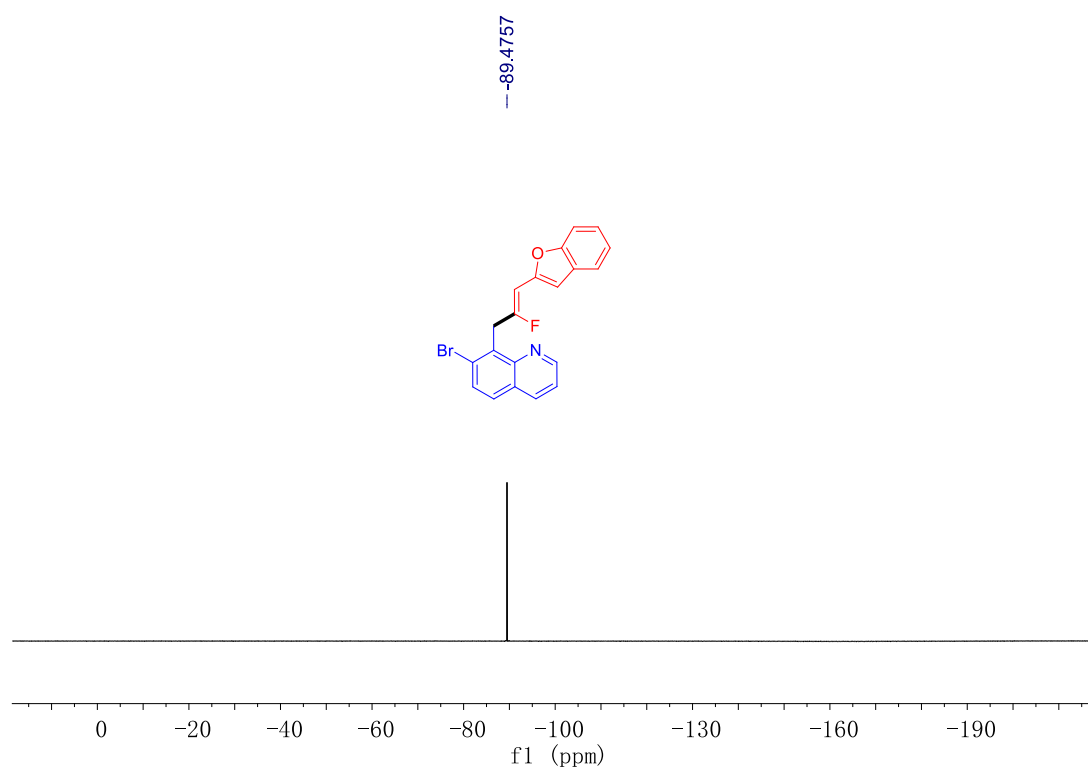

**3ao**

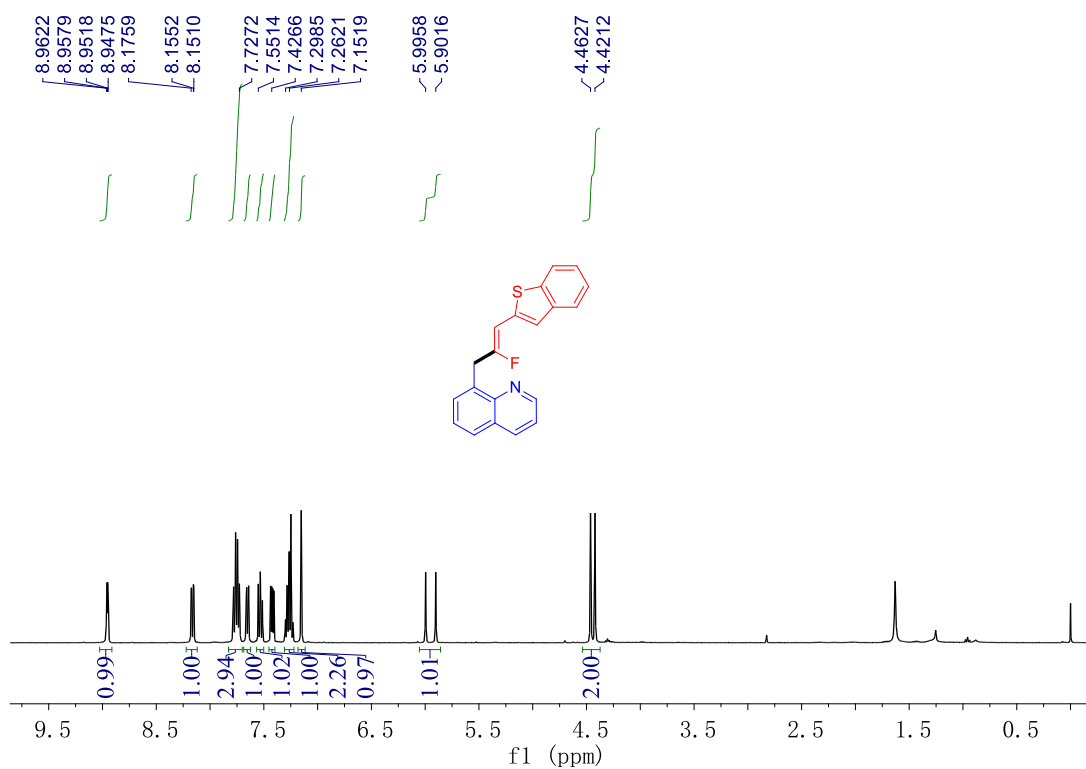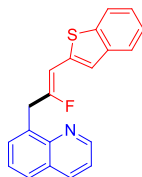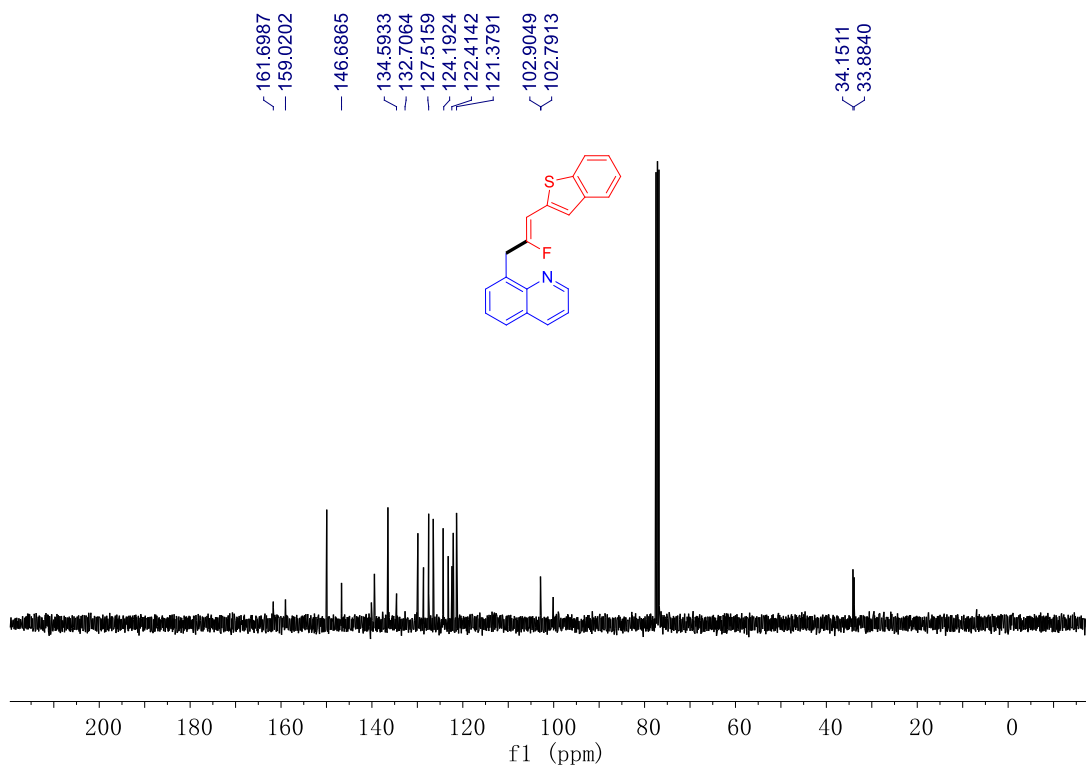

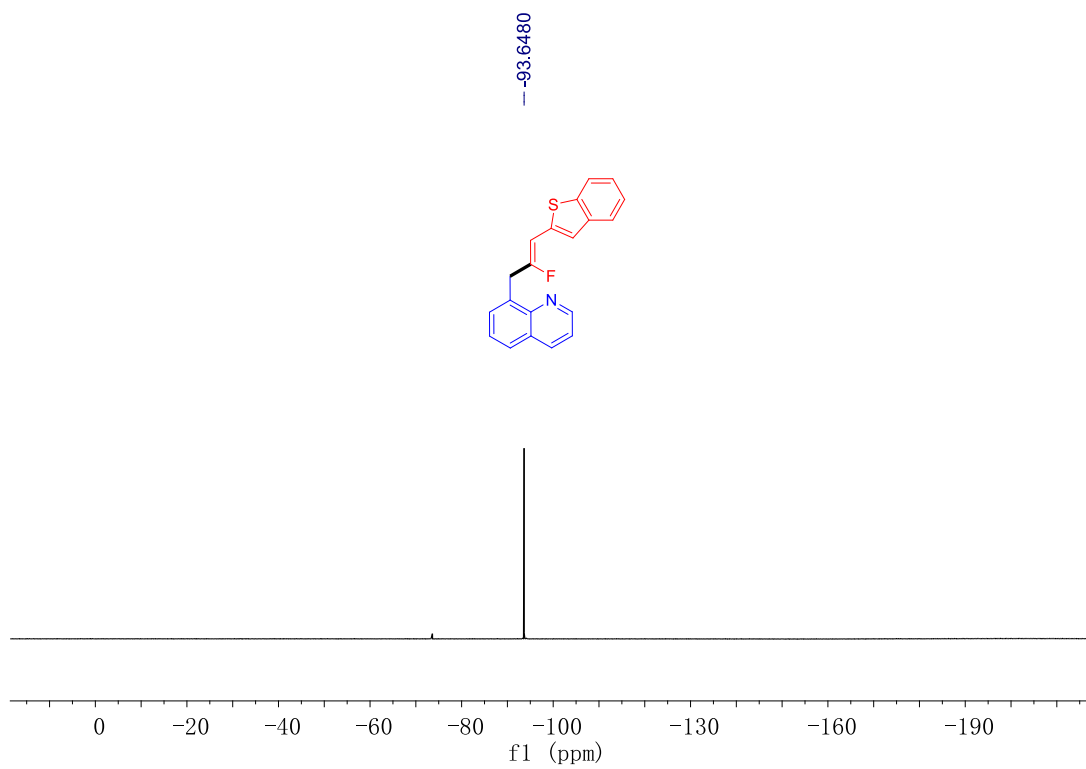

3ap

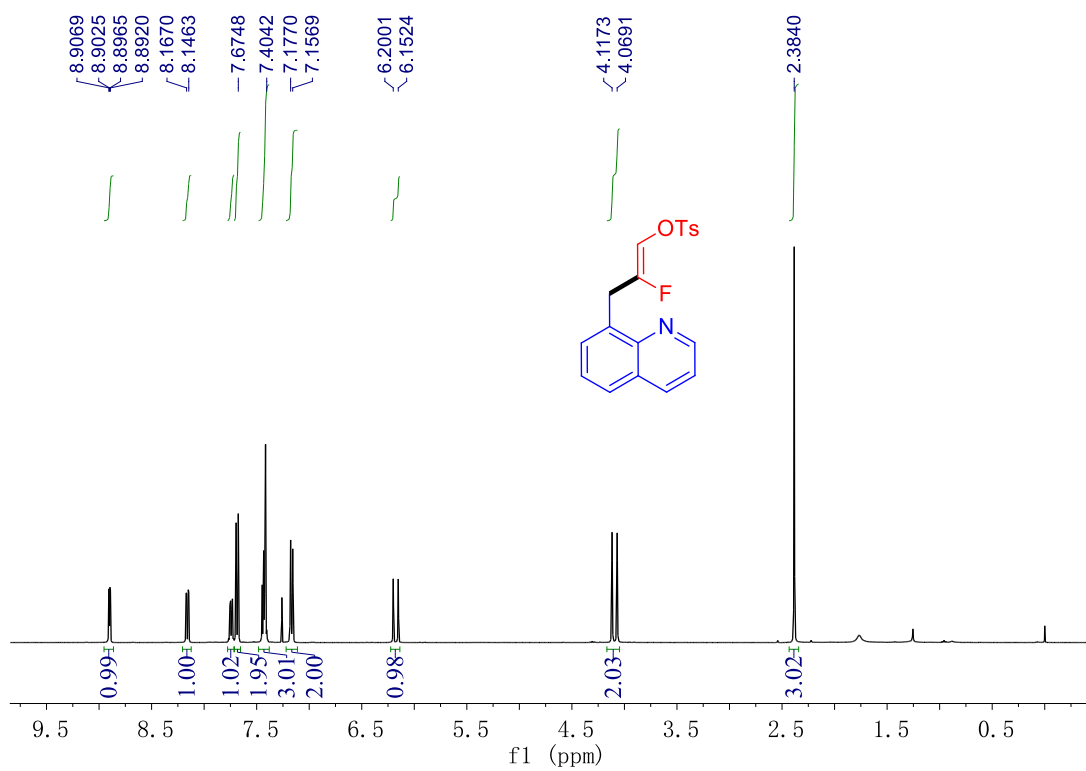

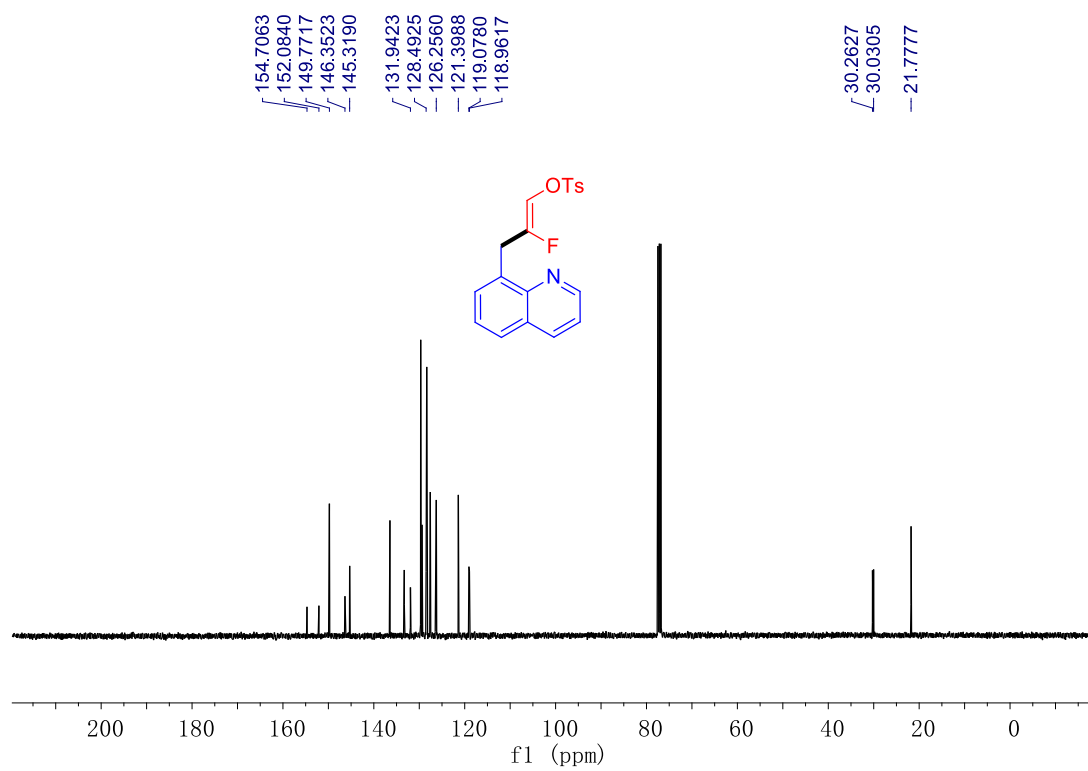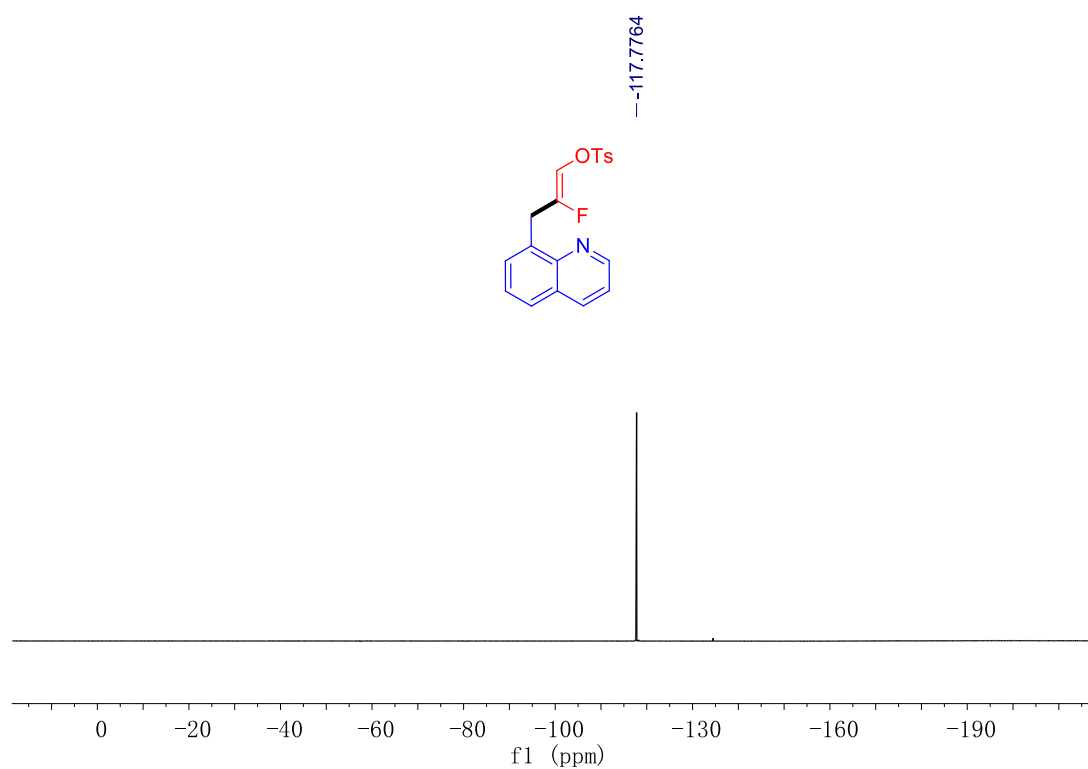

3aq

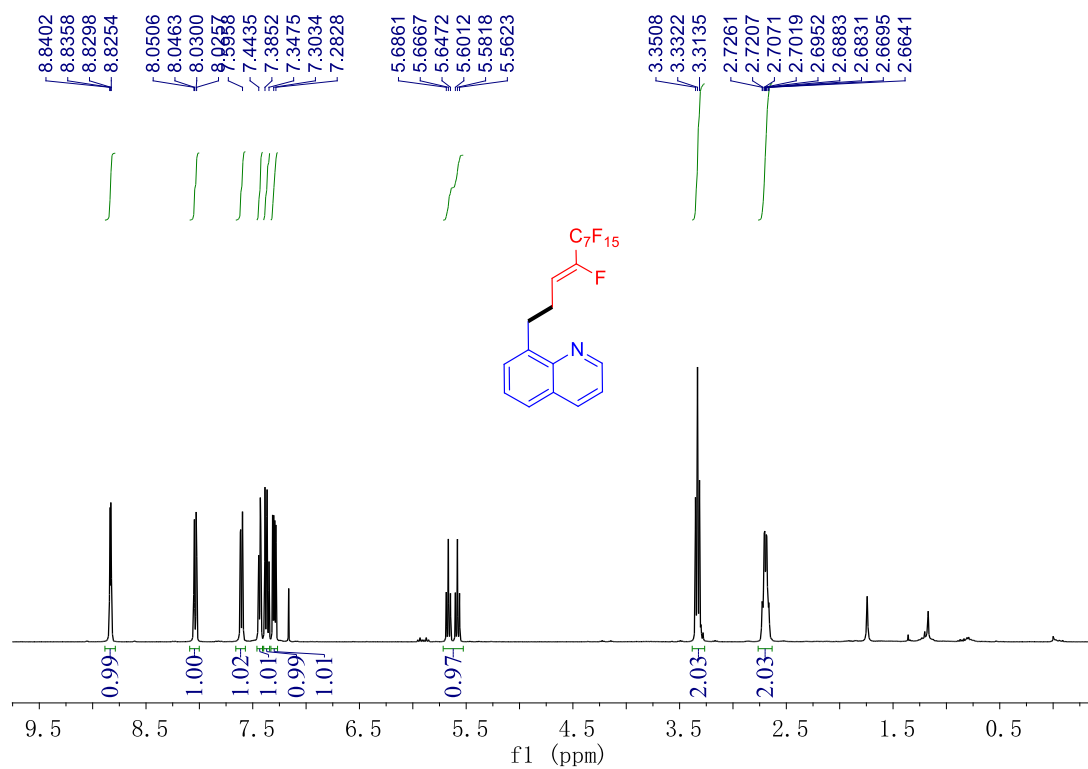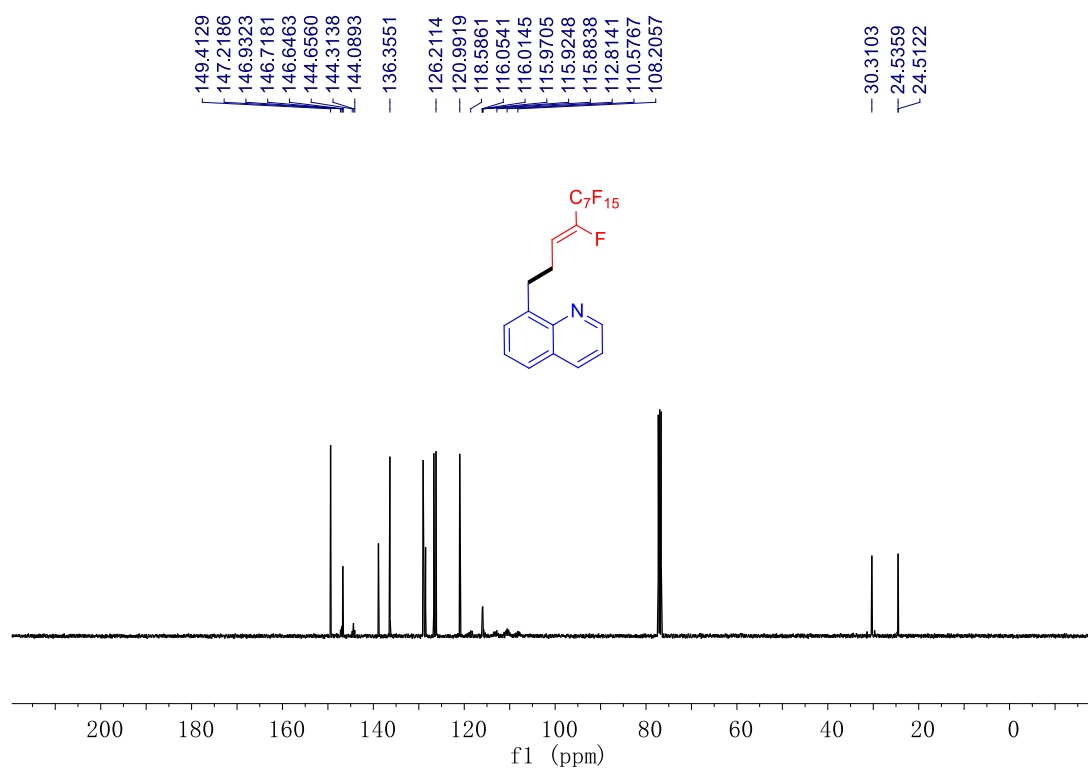



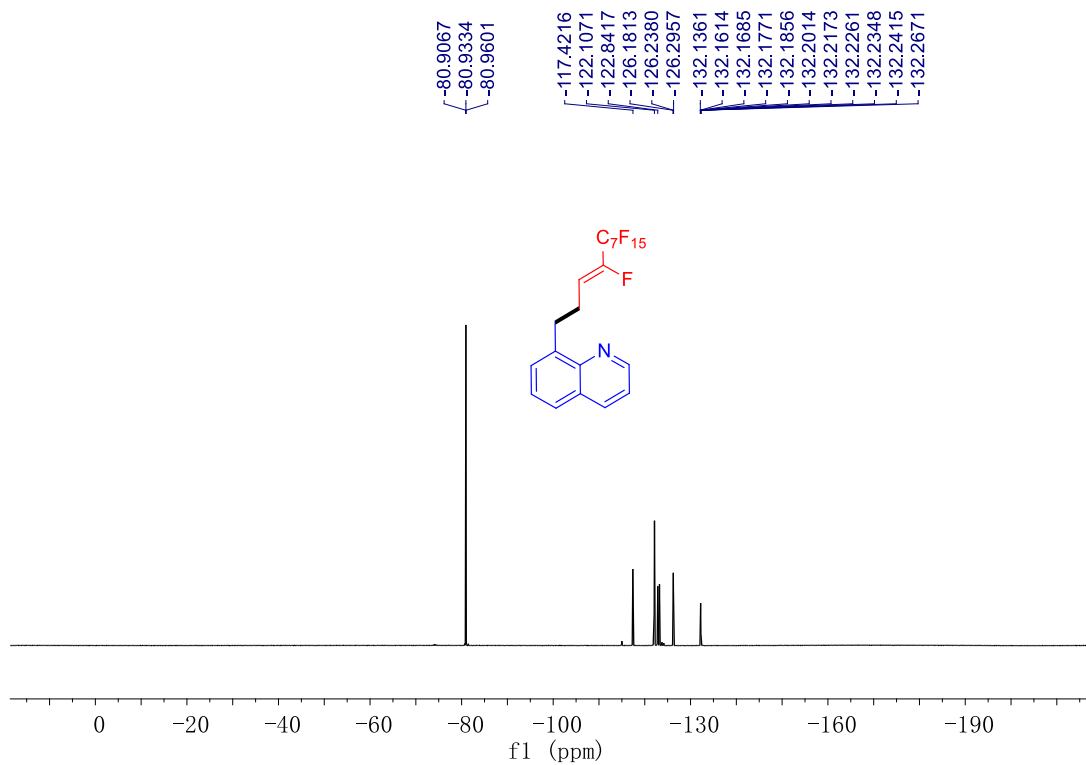

4

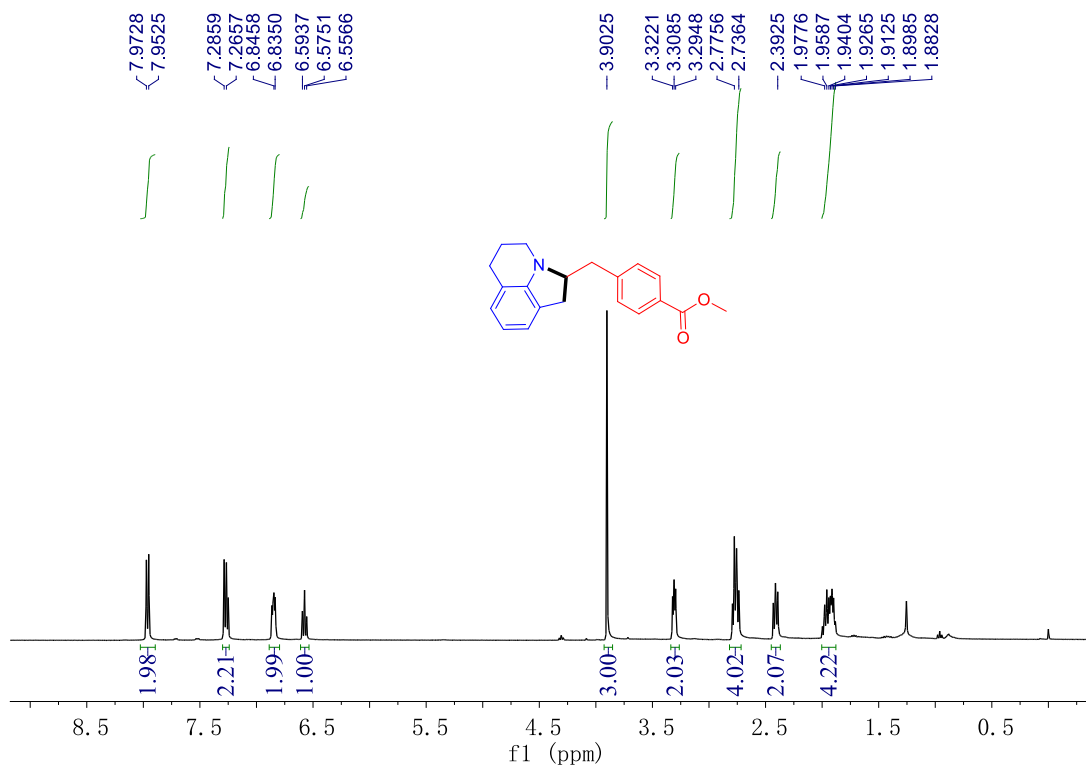

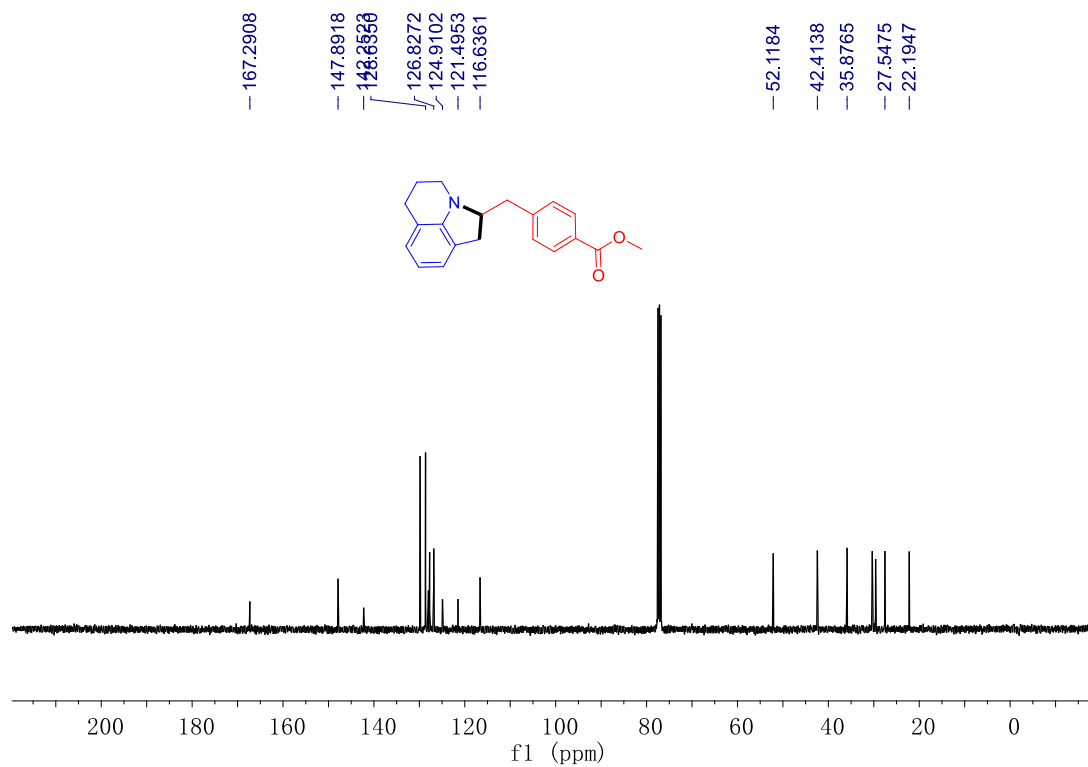

5

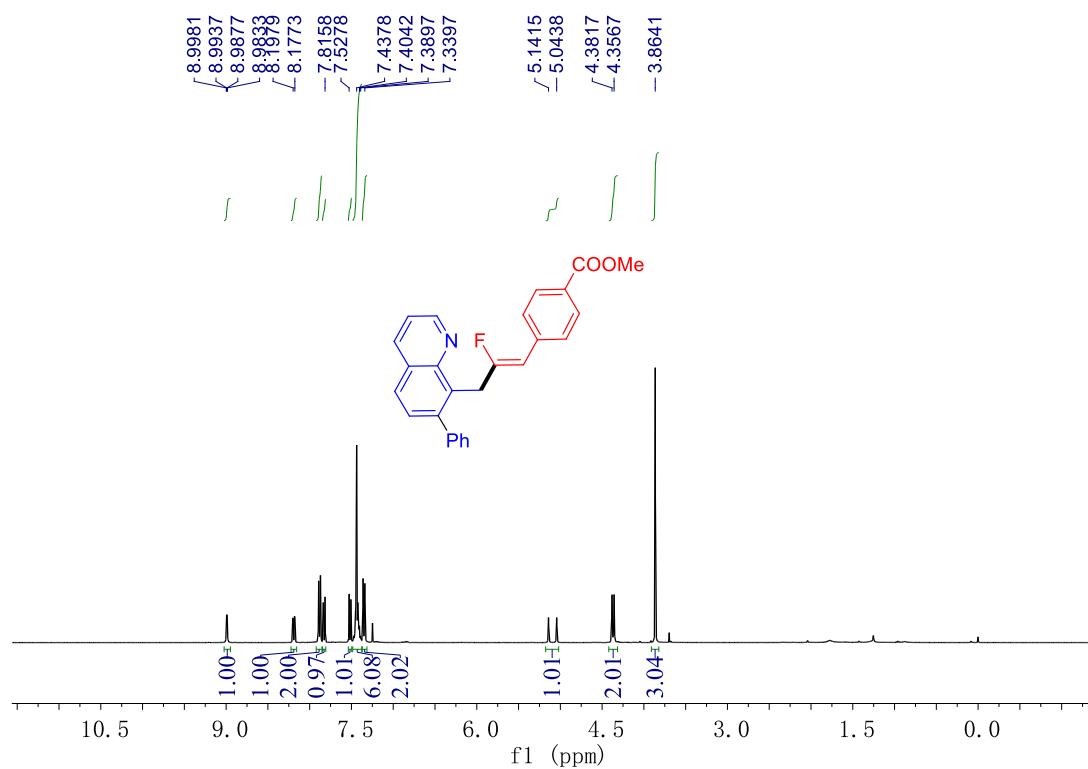

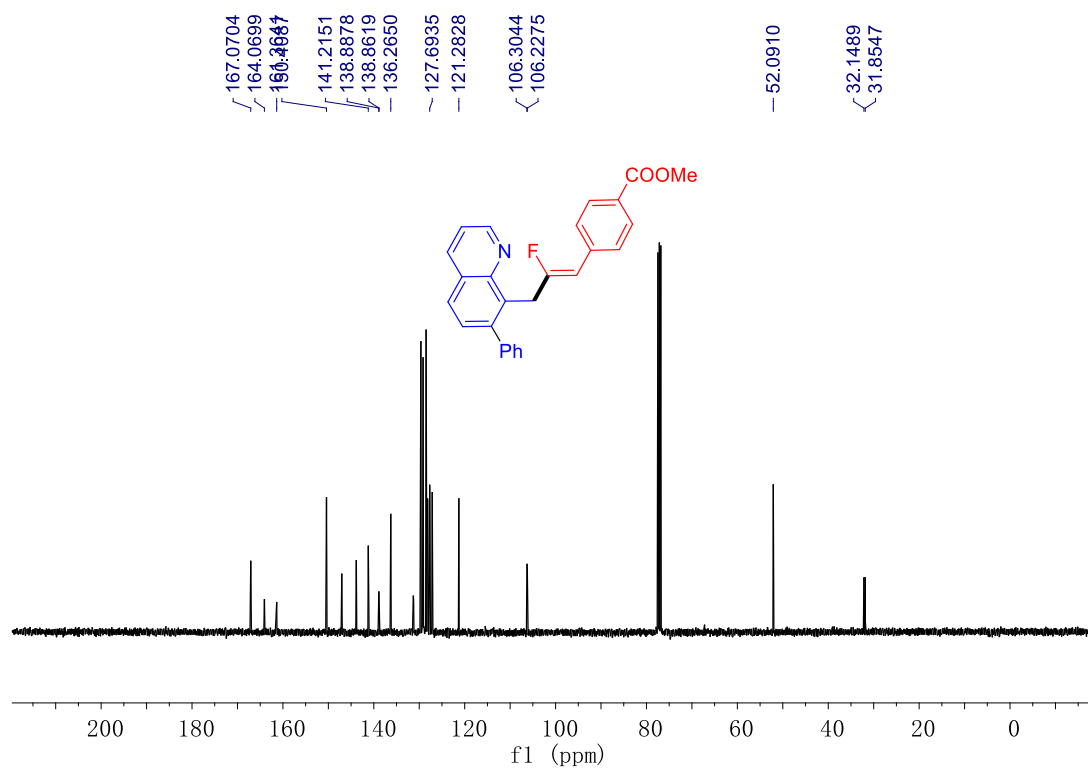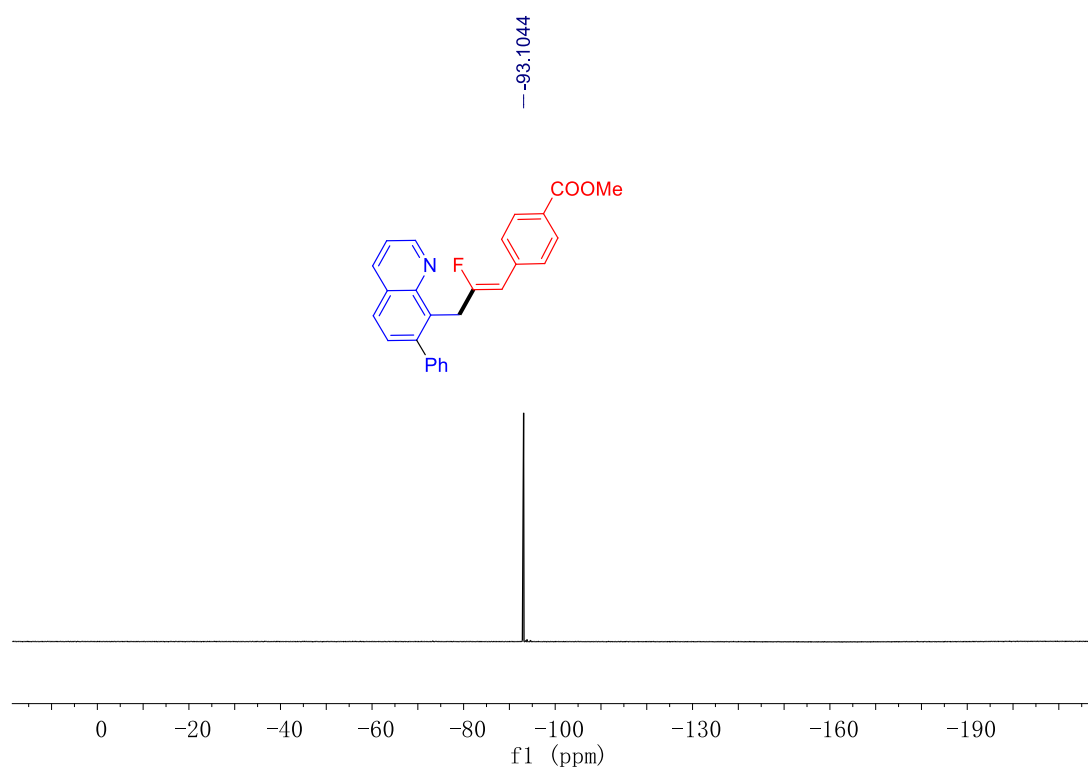

Supplement: c7cc06048c1.pdf [file c7cc06048c1.pdf]
